# Supplementary material for: NMR Characterization of Information Flow and Allosteric Communities in the MAP Kinase p38γ
Source: PubMed Central journal article supplement (PMC4926091; doi:10.1038/srep28655), 2016-06-29
Supplement: srep28655-s1.pdf [file srep28655-s1.pdf]

# **NMR Characterization of Information Flow and Allosteric Communities in the MAP Kinase p38 $\gamma$**

Phillip C. Aoto, Bryan T. Martin, and Peter E. Wright\*

## **Supplementary Information**

### Protein expression and purification

Specifically methyl protonated samples (Ile  $\delta$ 1, Val  $\gamma$ 1 or  $\gamma$ 2, Leu  $\delta$ 1 or  $\delta$ 2) for 3D side-chain assignment were expressed in cells grown in M9 minimal media in D<sub>2</sub>O and <sup>2</sup>H glucose supplemented with Val/Leu precursor  $\alpha$ -ketoisovalerate (2-keto-3-methyl-d<sub>3</sub>-3-d<sub>1</sub>-1,2,3,4- <sup>13</sup>C butyrate) and Ile precursor  $\alpha$ -keto-butyrates (2-keto-3,3,-d<sub>2</sub>-1,2,3,4 <sup>13</sup>C butyrate) <sup>1</sup>. Protein was purified and exchanged into NMR buffer as described in the main text, except that samples used for backbone assignments were collected at pH 6.8 in 10% D<sub>2</sub>O.

### NMR spectroscopy

Ile, Leu, and Val methyl side-chain resonances were assigned using methyl to backbone correlation experiments with specifically labeled methyl residues <sup>2</sup>. 3D side-chain correlation spectra were acquired at 293K using 30-50% non-uniform sampling (NUS) on a Bruker Avance III 800MHz spectrometer equipped with cryoprobe. Spectra for backbone assignments were acquired at 293K on Bruker Avance 750MHz and 900MHz spectrometers equipped with triple resonance gradient probes. Amide <sup>1</sup>H-<sup>15</sup>N, <sup>13</sup>C CO, C $\alpha$ , and C $\beta$  resonances were assigned using 3D TROSY HNCA, HNCACB, HNCOCA, and HNCO spectra acquired with 30-50% NUS. Sinusoidal weighted Poisson gap sampling schemes were generated as in <sup>3</sup> and optimal schemes were selected <sup>4</sup> for use in the <sup>13</sup>C indirect dimension. The <sup>15</sup>N constant time dimension was acquired with uniform sampling. NUS was implemented on 750MHz and 900MHz spectrometers by modification of the pulse program to include explicit looping based on an increment list corresponding to the NUS scheme. Mutagenesis described in the main text was used to supplement

assignments for residues that lacked backbone assignments or which had degenerate C $\alpha$  and C $\beta$  chemical shifts, and also to assign Met  $\epsilon$ -methyls. A  $^{13}\text{C}$  NOESY experiment was also acquired to aid in side chain assignment. Stereospecific methyl assignments were made with methyl CHD $_2$  labeled samples using a constant-time  $^{13}\text{C}$  HSQC experiment as described in <sup>5,6</sup>.

### Chemical shift assignments

Assignment of methyls by triple resonance requires prior assignment of C $\alpha$  and C $\beta$  chemical shifts. The  $^1\text{H}$ - $^{15}\text{N}$  TROSY spectrum of His-tagged apo p38 $\gamma$  contains 364 out of an expected 368 backbone resonances (Fig. S1a). Although a high percentage of expected cross peaks are observed, many peaks appear to be undergoing exchange broadening, and their cross peak intensities are near the noise and their linewidths are broad. As a consequence only 285 amide resonances or 77% of the backbone, excluding the His tag and prolines, could be assigned (Fig. S2). The backbone resonances of most regulatory regions of p38 $\gamma$  were assigned, including the activation loop, DFG loop,  $\alpha\text{C}$ -helix,  $\alpha\text{F}$ -helix, MAPK insert, and docking site. Secondary structure predictions from TALOS+, using the assigned backbone chemical shifts, accurately predicts the known secondary structure of p38 $\gamma$  (Fig. S2), giving confidence in the correctness of the assignments. In the  $^1\text{H}$ - $^{13}\text{C}$  HMQC spectrum of MILV specifically labeled His-tagged p38 $\gamma$ , 162 out of 164 expected resonances (Met( $\epsilon$ ), Ile( $\delta$ ), Leu( $\delta 1/\delta 2$ ), Val( $\gamma 1/\gamma 2$ )) were observed (Fig. S1b). Assignments for 121 or 73% of the methyl resonances were made via a tripartite method that combined triple resonance experiments correlating the assigned backbone chemical shift to the methyl resonances,  $^{13}\text{C}$  NOESY spectra to establish through-space connectivities, and single site mutagenesis (Fig. S2). All 13 Met  $\epsilon$ -methyls, as well as all 13 Ile  $\delta$ -methyls were assigned. One or both  $\delta$  and  $\gamma$  methyls were assigned for 32 out of 41 leucines and 24 out of 28 valines, respectively. Stereospecific assignment for 90% of the Leu and Val methyl assignments was accomplished. Assignments were transferred to the spectra of inactive ATP bound, inactive BIRB796 bound, and activated apo states.

### Changes in highly connected residues

Most residues with a high number of network connections (in the top third) in inactive apo p38 $\gamma$  surround the active site and docking site (Fig. S6). To maintain signaling homeostasis, inactive p38 $\gamma$  must remain catalytically inert yet exist in a state that is primed for activation by phosphorylation. This is clearly reflected in the network; the active site is highly connected and is sensitive to interactions throughout the protein. The docking site is also highly connected, consistent with its role in recruiting upstream kinases and facilitation of the conformational rearrangement of the activation loop necessary for phosphorylation<sup>7</sup>. Other regions of high connectivity correspond to elements involved in non-canonical activation, such as the MAPK insert and the  $\alpha$ C-helix<sup>8-10</sup>.

The overall network structure and flow suggests that the C-lobe in the inactive ATP bound and activated states has regulatory significance, as indicated by an increase in the number of highly connected residues in the C-lobe and a decrease in the N-lobe, relative to the inactive apo state (Fig. S6). The binding of ATP to inactive p38 $\gamma$  likely stabilizes a closed conformation, similar to that observed in activated kinases<sup>11,12</sup>. However, activation leads to proper packing of active site residues and further consolidates highly connected residues around the R-spine (Fig. S6). Residues in the C-lobe with high connectivity in the compact forms of p38 $\gamma$  (activated and ATP-bound) surround the  $\alpha$ F-helix, GHI subdomain,  $\alpha$ EF-helix, and P+1 loop (Fig. S7). These regulatory motifs are members of the architectural core of eukaryotic kinases and anchor the allosteric spines, interface with the catalytic loop, and also bind substrate.

### Contacts in the C-lobe

Highly connected residues identified from the network analysis of the compact forms of p38 $\gamma$  surround Y191 in the P+1 loop, which forms an electrostatic and hydrophobic junction between P+1,  $\alpha$ F-helix, and hydrophobic core (Fig. S7a). The P+1 loop interacts with substrate residues immediately adjacent to the substrate

phospho-acceptor site. This region, including Y191, has been shown to play a role in coupling the catalytically relevant open to closed domain movement in PKA <sup>13</sup>. Residues with high connectivity also suggest the GHI subdomain has an important role in the network. The GHI subdomain participates in various regulatory and allosteric interactions in eukaryotic kinases and is connected through hydrophobic interactions to the  $\alpha$ -EF and F-helices, which indirectly access the active site <sup>14</sup>. Examples of regulation through GHI subdomain interactions include myristate binding in c-Abl and allosteric inhibitors for Bcr-Abl, which access a pocket above the GHI subdomain, between the H, E, and F-helices <sup>15</sup>. This binding pocket is adjacent to the highly connected residues in the compact forms of p38 $\gamma$  (Fig. S7b). Although myristate and derived inhibitors are thought to regulate c-Abl by  $\alpha$ I-helix disruption and subsequent stabilization of SH2/SH3 domain docking <sup>15,16</sup>, it is possible that myristate binding also perturbs the network in this highly connected region. The myristate pocket in c-Abl does not exist in p38 $\gamma$ , suggesting different kinases may exploit this critical node in different ways.

#### Pathways of docking site mediated auto-activation

The pathways described in Fig. 7 may be involved in docking site mediated auto-activation. A pivot around the hinge between the N and C-lobes facilitates the opening and closing of the kinase. Along with this movement, change in the orientation of M112 in the hinge has been suggested to allow ATP binding <sup>17</sup>. The influence that docking site residues have on the hinge, as revealed by the mediation analysis, may thus have consequences on stabilization of the open (inactive) or closed (active) states as well as the propensity for ATP binding. Indeed, cooperativity between docking site interactions and nucleotide binding has been observed experimentally in activated p38 $\alpha$  <sup>11</sup>. Here, we also observe that the docking site is indirectly connected to the  $\alpha$ C-helix and L16 loop. The position of the  $\alpha$ C-helix is thought to influence the alignment of catalytic residues in kinases <sup>8</sup> and it has been proposed that the  $\alpha$ C-helix position is stabilized by the L16 loop in MAPKs <sup>18-20</sup>. Taken together, the docking site's influence on the hinge and its effect on active-site residues revealed by the network analysis corroborate a mechanism

proposed for docking site induced auto-activation of p38 $\alpha$  by TGF $\beta$ -activated kinase 1 binding protein (TAB1), whereby TAB1 docking peptide binding increases the p38 $\alpha$  affinity for ATP and facilitates closure of N and C-lobes and rearrangement of the  $\alpha$ C-helix, leading to auto-phosphorylation<sup>21</sup>. The critical flow demonstrates that overlapping and redundant pathways connect the docking site to the activation loop and catalytic residues.

#### Reducing local-effects of mutation on correlations

Spearman ranked correlation coefficients were used in the analysis and identify monotonic relationships, whereas Pearson's correlation coefficient (unranked) will only identify linear relationships. Methyls near mutation sites undergo large chemical shift perturbations relative to distant methyls. Thus, these large chemical shifts near sites of mutation may bias pairwise linear correlations (e.g. correctly identifying strong correlations between residues that are in similar proximity to multiple mutation sites; but giving weak or failing to find linear correlations between residues that are not near the same mutation sites). Ranking, thus allows non-linear but monotonic relationships to be properly identified for use in the network analysis described within. As described in the main text, negative correlations were discarded for simplicity of analysis. We could not rationalize an interpretation of negative correlations of chemical shift differences in the context of our network analysis utilizing information flow. However, important information about the network may be included in negative correlations and their incorporation into the described network analysis may be an area of future study.

#### Minimum number of mutations required for network analysis

The network analysis only reveals relationships that are perturbed by the mutations. Thus, to thoroughly describe a protein's network structure mutations need to be dispersed throughout the protein. Obviously, the most comprehensive network structure will result from 1) the greatest number of mutants possible (and number of observed resonance perturbations) and 2) when mutants are chosen to sample the entire protein. The enrichment of 2-point correlation p-values can be

used to determine if an adequate number of mutants are being examined for the network analysis of a system.

To determine the minimum number of mutations required for accurate description of the networks of p38 $\gamma$ , datasets for individual mutations within the apo inactive state of p38 $\gamma$  were randomly removed from the analysis until the original network structure was no longer reproduced. With the 78 observed methyl perturbations at least 11 mutations were necessary to reproduce the principal features of the network structure described in the main text (which used 20 mutants). See Figure S9 for details of the network structure derived from 11 mutations (L77V, M109L, M112L, M120L, M137L, L159V, L174V, L198V, M216L, I238L, M291L) -see main text Figure 3 for comparison. Within the set of 11 mutations that led to successful identification of the network, individual mutant datasets were replaced one at a time from the total set of 20 mutant datasets. Each of the combinations results in a network structure that is similar to the original network (derived with 20 mutants) and gives similar enhancements in one-tailed p-values for two point correlations. The enhancement of one-tailed p-values for two point correlations predicts the performance of the network analysis.

### **Supplementary Figures**

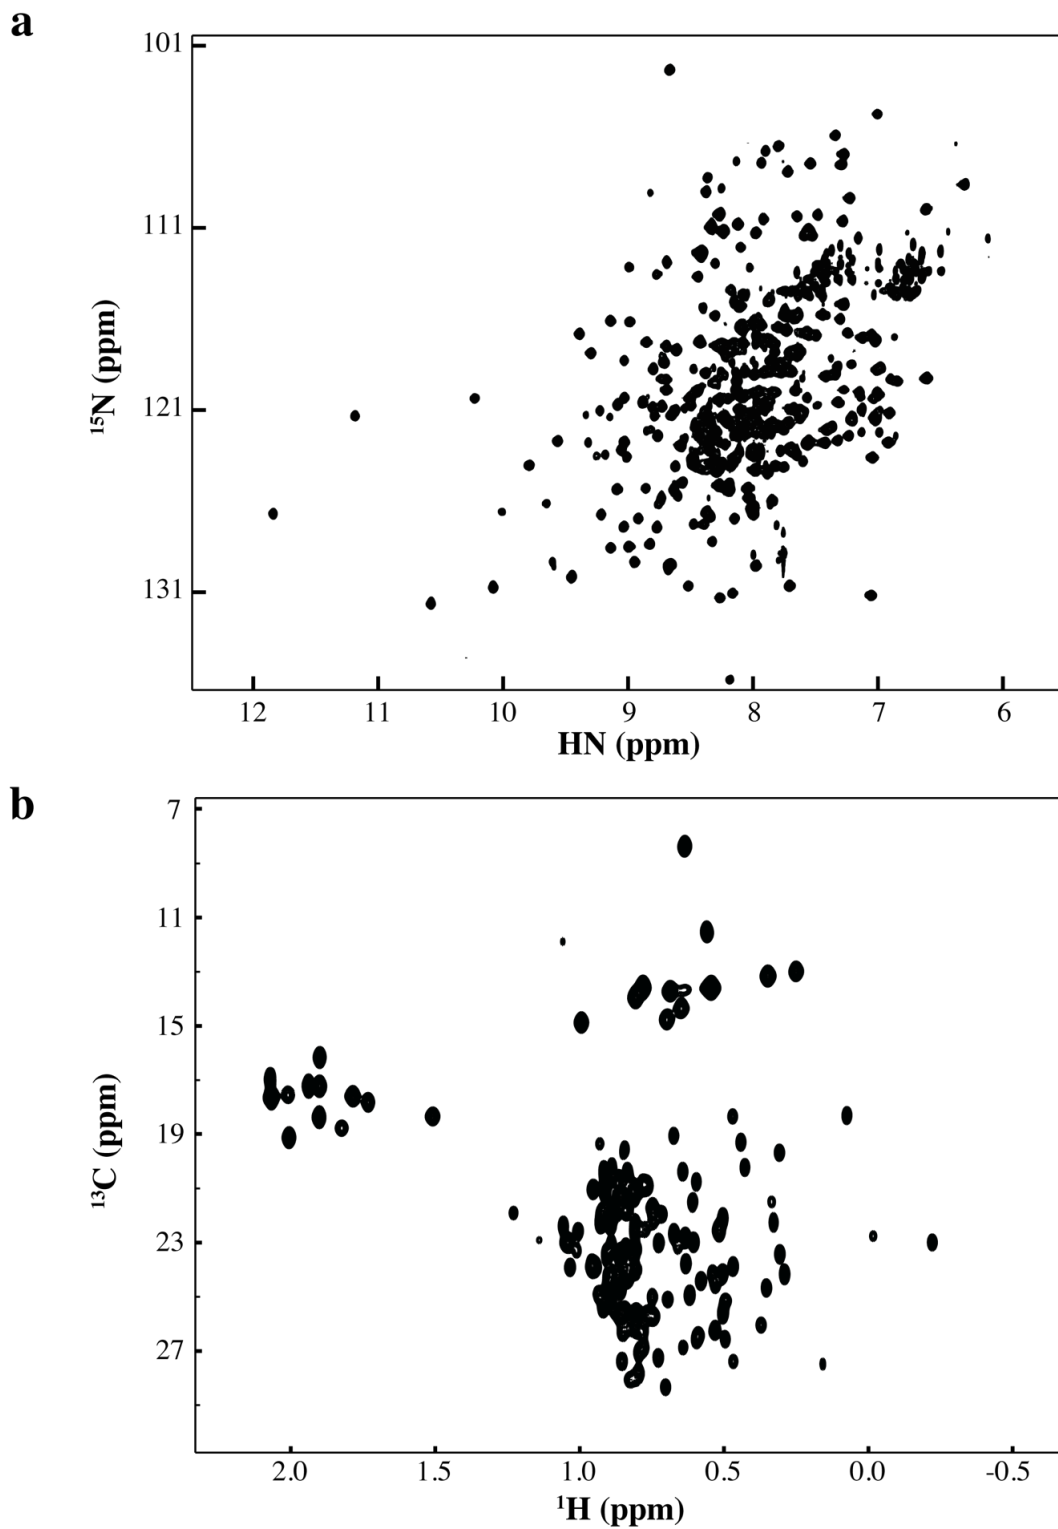

**Figure S1.** NMR spectra of His-tagged apo p38 $\gamma$ . a)  $^1\text{H}$ - $^{15}\text{N}$  TROSY of uniformly  $^{15}\text{N}$ -labeled and b)  $^1\text{H}$ - $^{13}\text{C}$  HMQC of MILV specifically labeled apo p38 $\gamma$ .

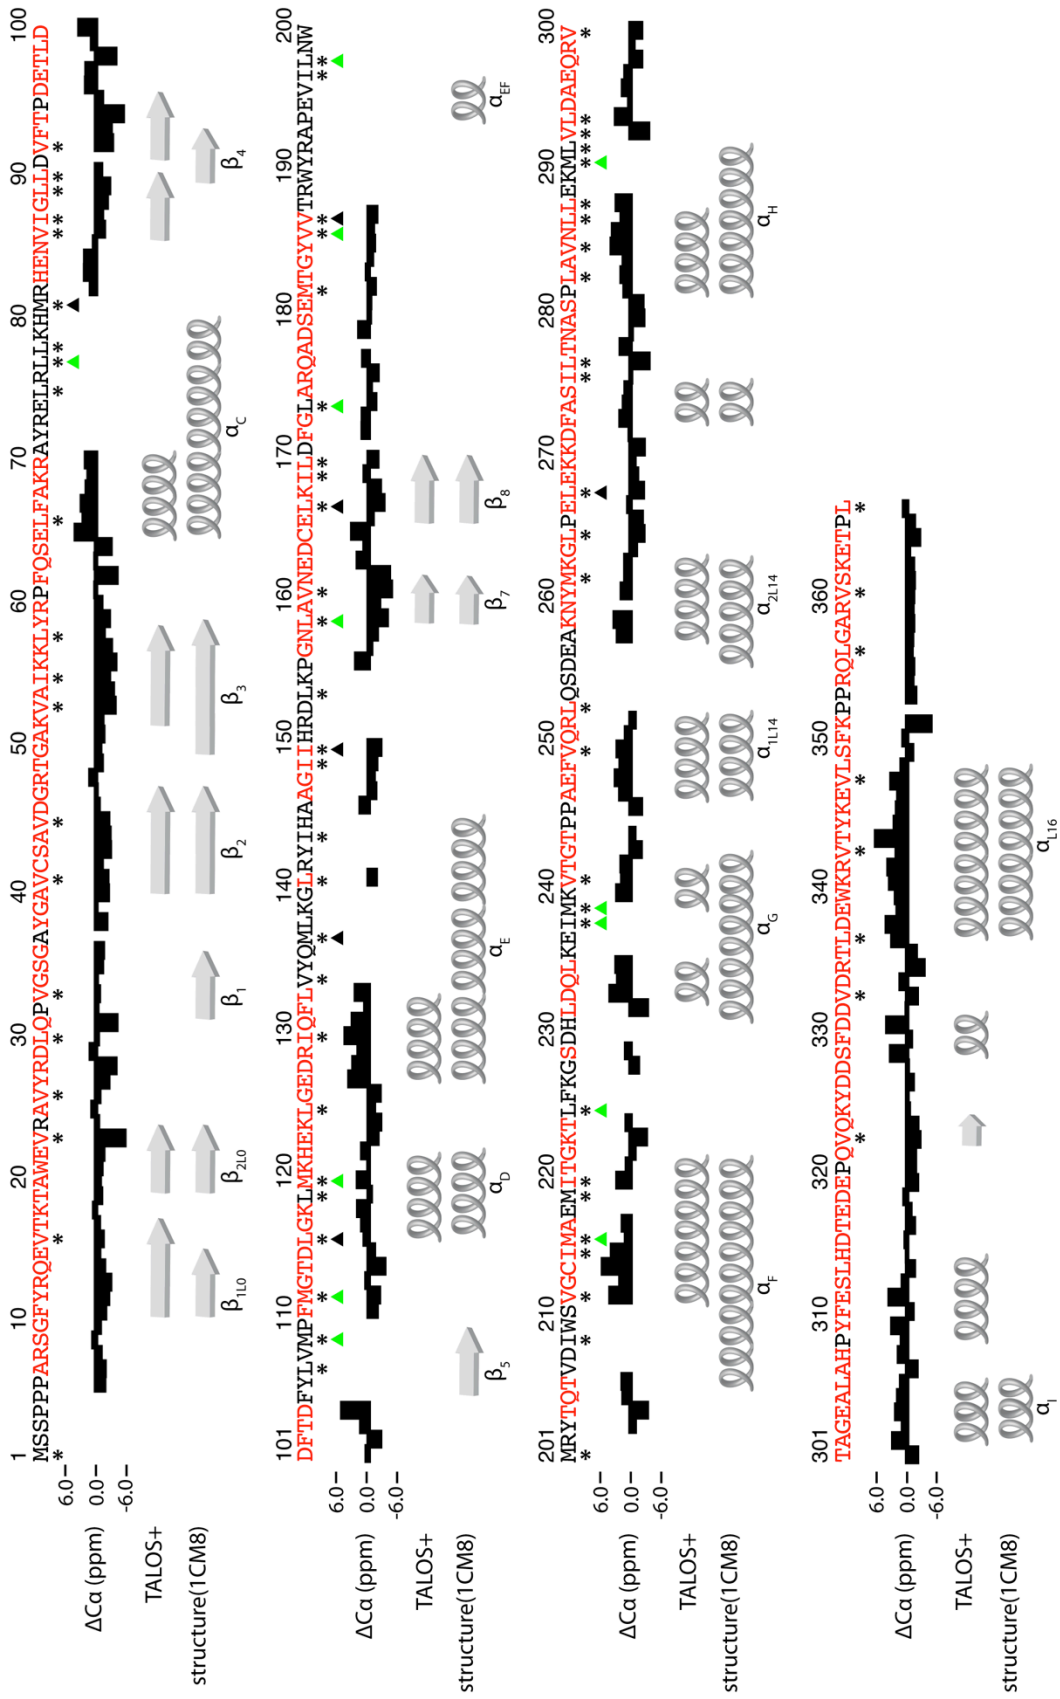



**Figure S2.** NMR assignments and secondary structure of p38 $\gamma$ . Residues for which backbone assignments could be made are shown in red, and side chain methyl assignments are indicated by asterisks. Deviations of  $^{13}\text{C}\alpha$  chemical shifts from random coil values are shown as black bars. The 20 methyl containing side chains subjected to conservative mutagenesis are indicated by triangles (green and black). The 13 mutations used in the inactive ATP bound, BIRB796 bound, and activated states are shown as green triangles.



mutagenesis. a) Communities are grouped links (paired residues). The partition density function described in <sup>22</sup> was used to determine a cut-off (red dashed line) to obtain the 4 communities. b) Link communities in a) plotted by color on the structure of p38 $\gamma$ . The communities are similar to those in Fig. 3 and correspond to the MAPK-insert (red), N-lobe (green), entire protein (purple), and the active-site/docking-site (yellow). Some communities identified in Fig. 3 are not identified here, such as the R and C-spines, and the C-lobe, instead they are included in a single community encompassing the entire protein (purple), which was not identified in the results presented in Fig. 3. c) Network graph of link communities, demonstrating residue (node) connections and overlap. Nodes (circles) represent residues in p38 $\gamma$ . The community membership of each residue is indicated by pie-chart color corresponding to communities in a).

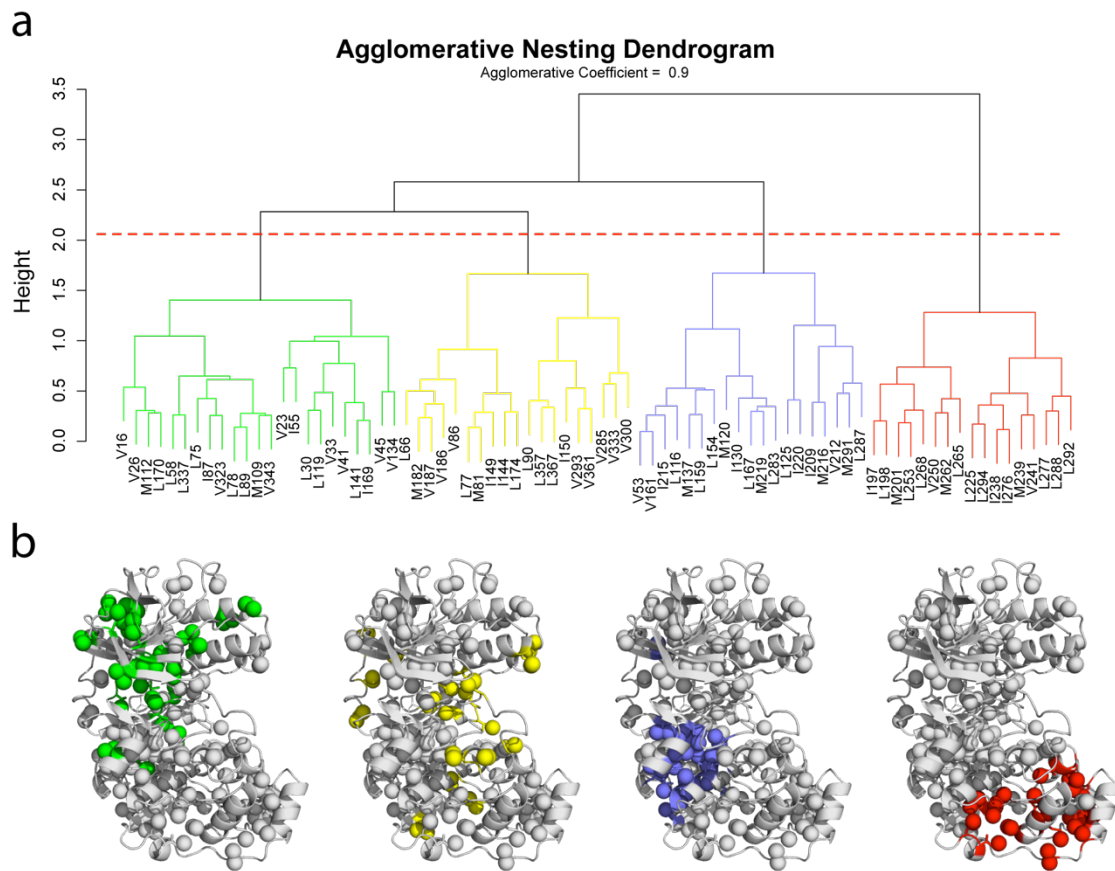

**Figure S4.** Agglomerative hierarchical clustering of inactive apo p38 $\gamma$ . a) Non-overlapping communities and hierarchy were identified by agglomerative clustering

of two-point correlations of chemical shift perturbations caused by conservative mutagenesis using Ward's method within the agnes function in R <sup>24</sup>. A threshold (red dashed line) was chosen to give 4 communities. b) Communities in a) plotted by color on the structure of p38 $\gamma$ . The communities correspond to regulatory elements, similar to those in Fig. 3: N-lobe/C-spine (green), R-spine (yellow), docking-site (blue), MAPK-insert (red). Some of the differences in results from Fig. 3, such as the docking-site having a distinct community and the absence of a C-lobe community, is likely due to the inability of the agglomerative clustering method to identify overlapping communities.

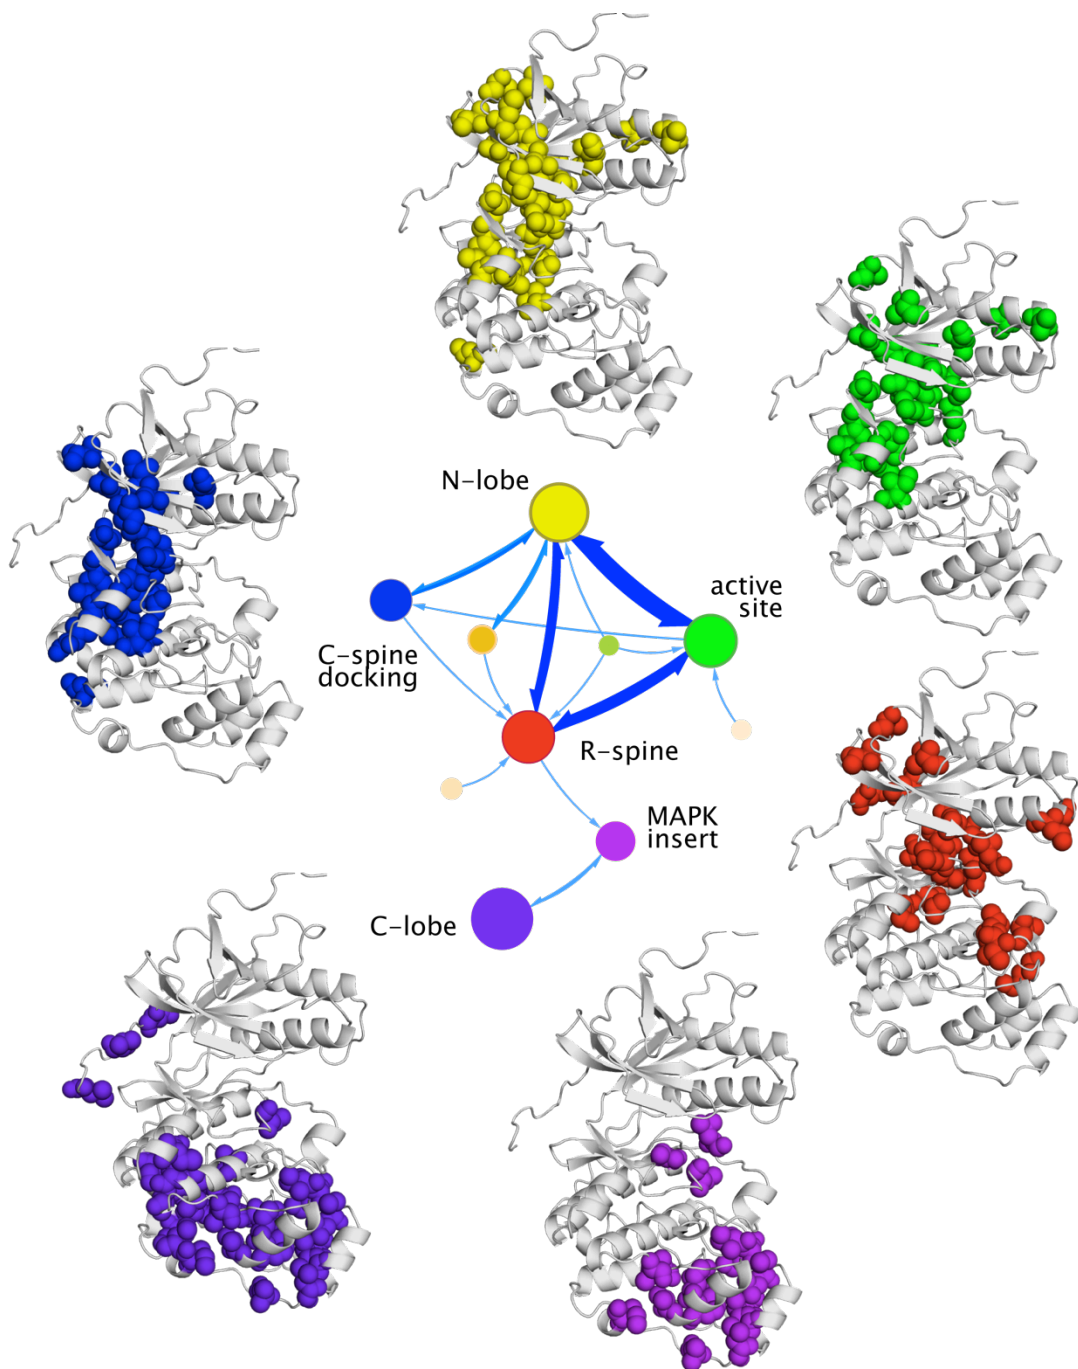

**Figure S5.** Network structure and flow for inactive apo p38 $\gamma$  derived from a limited set of mutants. Identified communities from chemical shift perturbation networks are colored based on tertiary structure and regulatory element: N-lobe, yellow; C-lobe, purple; active-site, green; C-spine, blue; R-spine, red; MAPK-insert, lavender. The size of the modules represents the amount of flux and connections between residues within the module. Thickness of arrows between communities represents

the amount of flux between communities. Using a common set of 13 mutants of inactive apo p38 $\gamma$  (used also for ATP bound, BIRB796 bound, and activated states) in the network analysis yields clustered communities similar to the analysis with 20 mutants described in the main text (see Fig. 3). One noticeable difference is that the module most closely corresponding to the 'R-spine' residues is linked to the C-lobe and MAPK insert in this analysis, whereas the results from 20 mutants has the active site community linked to the C-lobe and MAPK insert. The R-spine and active site communities are overlapped so that this does not reflect a major change in the network structure. The remainder of the network connections are very similar for the analysis performed using data from 13 or 20 mutants. The relative flow between communities is also similar.

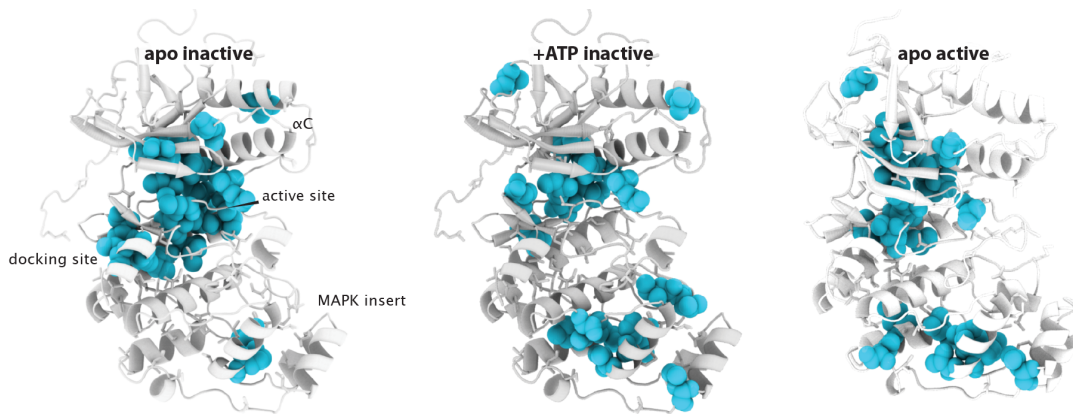

**Figure S6.** Critical network nodes reveal regulatory sites and pathways. Residues with a large number of connections to the network (cyan spheres) highlight regions that are important in the function and regulation of p38 $\gamma$ . Changes in state of p38 $\gamma$  cause reorganization of the network, illustrated by redistribution of highly connected residues. An increase in connected residues in a regulatory region indicates the region has greater influence on the network.

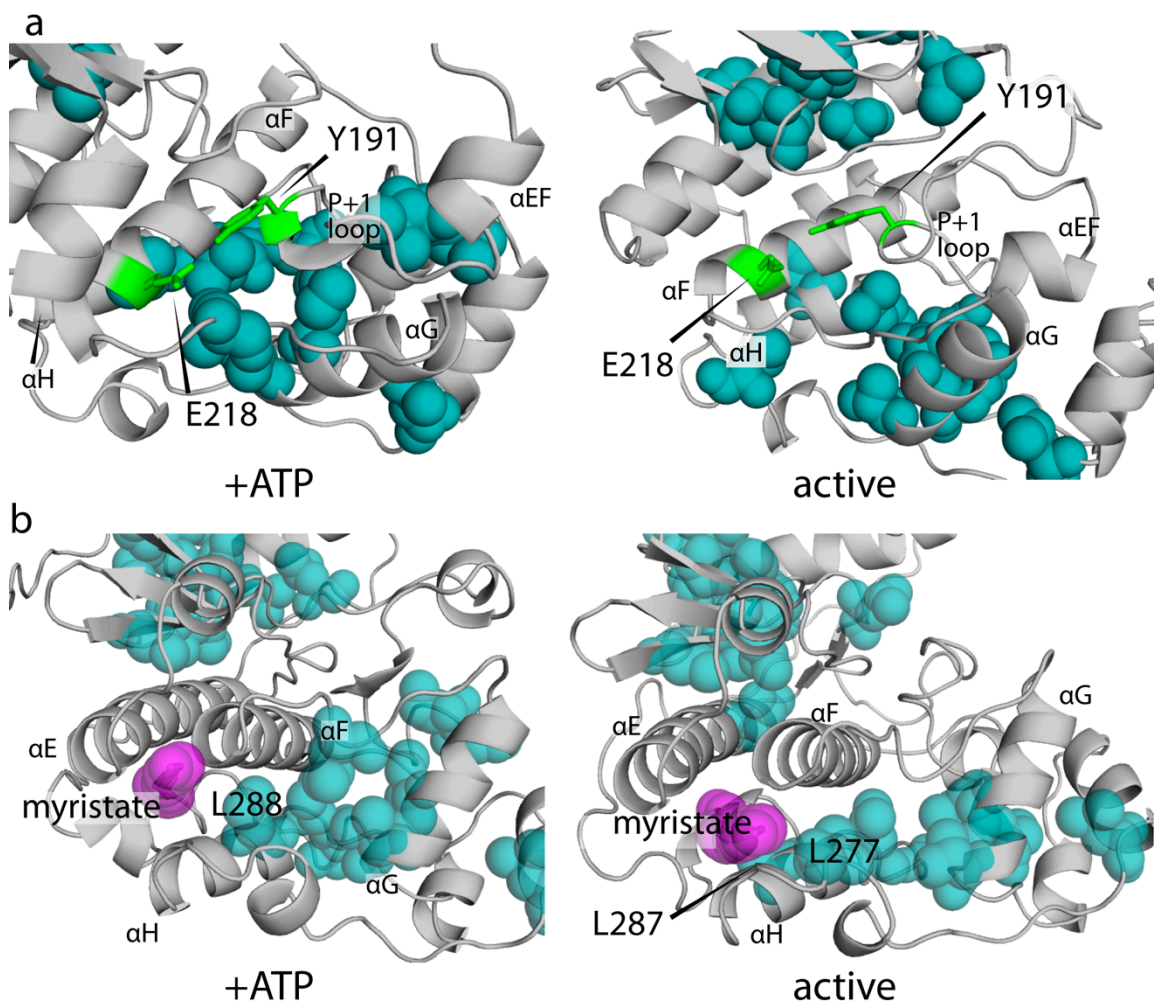

**Figure S7.** Residues with high network connectivity in the C-lobe of compact forms of p38γ surround the architectural core of eukaryotic kinases. a) Y191 in the P+1 loop and E218 in the F-helix constitute an electrostatic and hydrophobic node coupling the N and C-lobes and active site<sup>13</sup>. Residues with high connectivity (cyan spheres) surround Y191 and the P+1 loop in the inactive ATP bound and activated forms of p38γ. b) An abundance of highly connected residues are found in the GHI subdomain in inactive ATP bound and activated forms of p38γ. An example of regulation via interaction with the GHI subdomain is myristate (purple spheres) binding to c-Abl. The c-Abl myristate binding site's proximity to the clusters of highly connected residues in p38γ (cyan spheres) is illustrated.

## 2-point correlation statistics

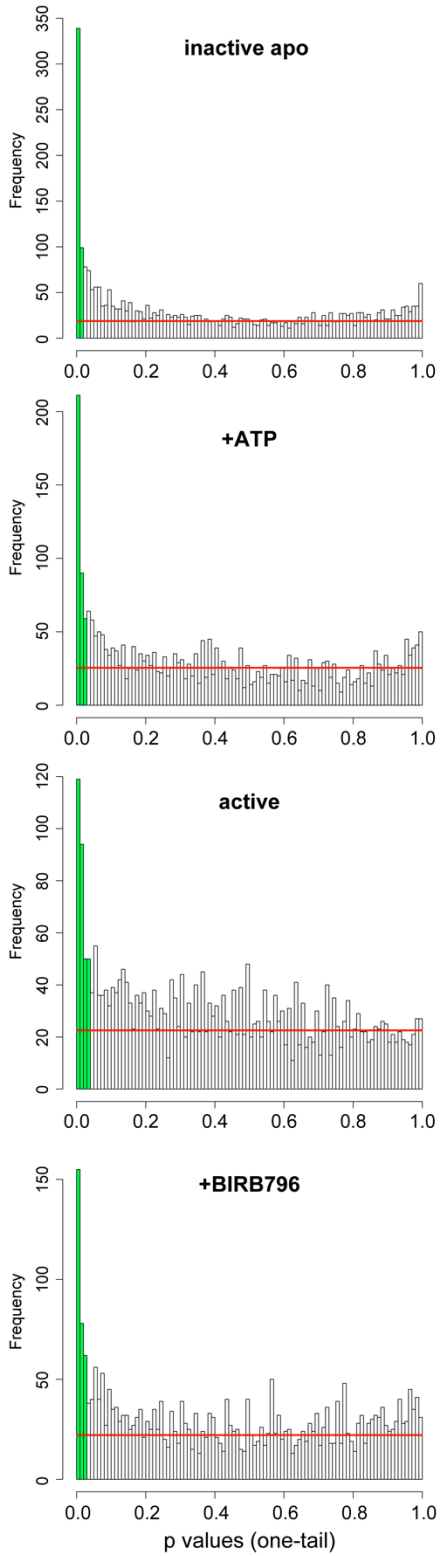

## 3-point partial correlation statistics

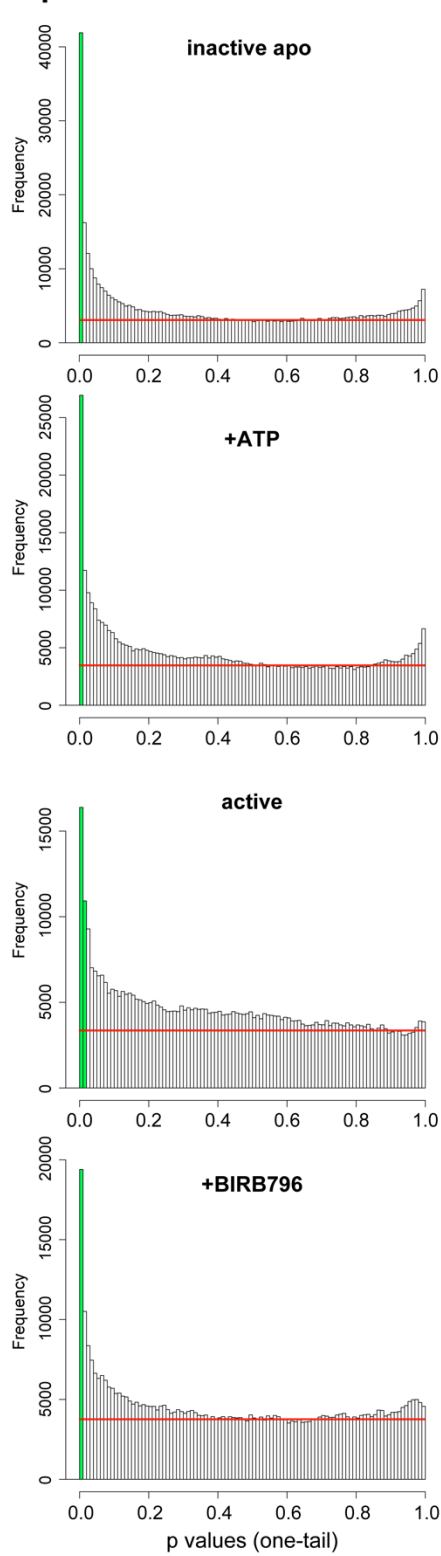



**Figure S8.** Two point correlation and multiple regression statistics. One tailed p-value histograms from t-tests of two-point ranked correlations (left) and three-point multiple regression partial correlations (right) are shown. Critical p-values were chosen (green) for enrichment of the alternative hypothesis over the uniformly distributed null p-values (approximated by red line). Uncorrected p-values  $\leq 0.01$  (0.005) were considered significant for 2 (3) point correlations of inactive apo p38 $\gamma$ . Uncorrected p-values  $\leq 0.03$  (0.015) were considered significant for 2(3) point correlations of inactive p38 $\gamma$  complexed with ATP or BIRB796. In the active apo state uncorrected p-values  $\leq 0.04$  (0.02) were considered significant for 2(3) point correlations. A soft-threshold was used on two-point correlation coefficients for probabilities of teleportation in the MapEquation analysis, as described in the main text. Three point multiple regression partial correlation coefficients were used as described in the main text in the calculation of three-residue flow for MapEquation.

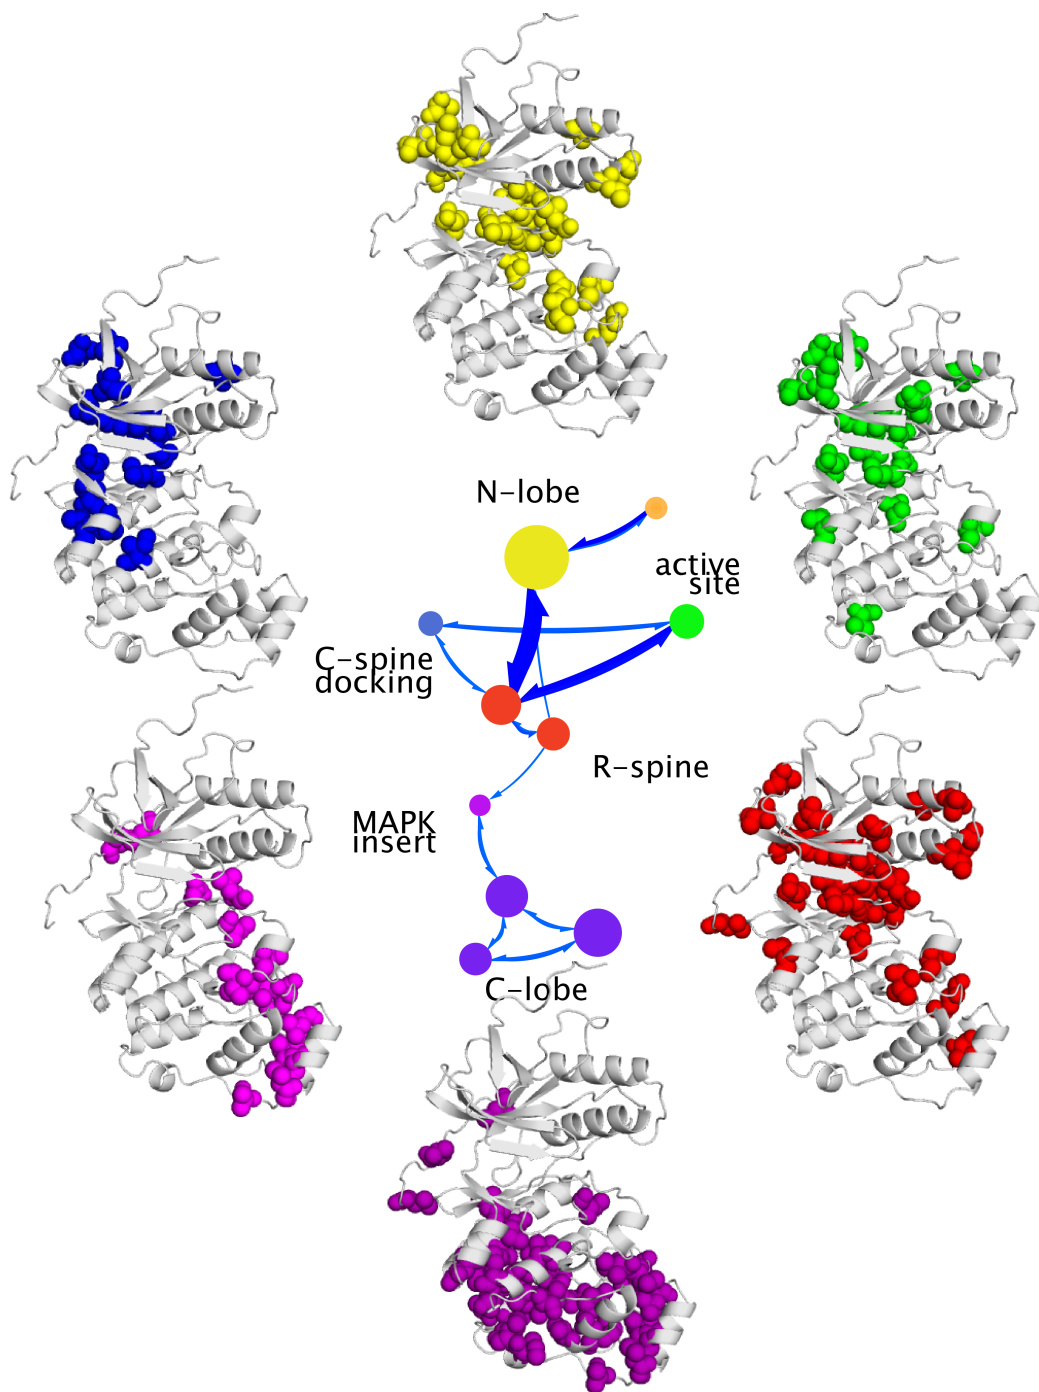

**Figure S9.** Representative network structure and flow for inactive apo p38 $\gamma$  derived from a minimal set of mutants. Identified communities from chemical shift perturbation networks are colored based on tertiary structure and regulatory element: N-lobe, yellow; C-lobe, purple; active-site, green; C-spine, blue; R-spine, red; MAPK-insert, lavender. The size of the modules represents the amount of flux

and connections between residues within the module. Thickness of arrows between communities represents the amount of flux between communities. Using a minimal set of 11 mutants of inactive apo p38 $\gamma$  in the network analysis yields clustered communities similar to the analysis with 20 mutants (and 13 mutants) described in the text (see Fig. 3 and Fig. S5). One noticeable difference is that the module most closely corresponding to the 'R-spine' residues is linked to the C-lobe and MAPK insert in this analysis, whereas the results from 20 mutants has the active site community linked to the C-lobe and MAPK insert. The R-spine and active site communities are overlapped so that this does not reflect a major change in the network structure. The overall network structure is the same but some communities are split (i.e. using a greater number of mutants the C-lobe is a single community, here it is represented by 3 highly overlapped communities). The relative flow between communities is also similar.

**Table S1. <sup>1</sup>H-<sup>13</sup>C average chemical shift perturbations from wildtype inactive apo p38γ (Hz)**

| Residue | L77V  | M81L  | M109L | M112L | L116V  | M120L | M137L | I150L | L159V | L167V | L174V | V186A | V187A | L198V | M216L | L225V | I238L  | M239L | L268V | M291L |
|---------|-------|-------|-------|-------|--------|-------|-------|-------|-------|-------|-------|-------|-------|-------|-------|-------|--------|-------|-------|-------|
| 16      | 6.1   | 3.3   | 7.1   | 12.5  | 8.8    | 7.2   | 3.5   | 6.0   | 4.1   | 4.9   | 7.8   | 2.1   | 7.6   | 5.0   | 1.9   | 4.0   | 1.8    | 4.3   | 0.8   | 3.0   |
| 23      | 4.0   | 2.6   | 6.7   | 5.2   | 5.1    | 3.5   | 2.2   | 4.1   | 4.9   | 4.2   | 3.3   | 3.8   | 3.7   | 4.2   | 1.4   | 8.1   | 1.7    | 1.3   | 4.1   | 4.6   |
| 26      | 7.5   | 10.8  | 11.9  | 5.3   | 3.4    | 5.3   | 3.2   | 2.8   | 1.9   | 5.1   | 6.1   | 1.3   | 3.2   | 1.8   | 1.6   | 1.8   | 1.3    | 1.7   | 3.0   | 1.8   |
| 30      | 5.4   | 8.2   | 10.6  | 4.1   | 7.0    | 0.6   | 3.4   | 7.2   | 4.7   | 5.3   | 6.6   | 1.5   | 6.9   | 10.7  | 3.5   | 3.4   | 4.4    | 0.0   | 1.1   | 3.2   |
| 33      | 3.0   | 7.5   | 5.1   | 14.2  | 4.8    | 4.3   | 4.2   | 5.7   | 0.8   | 7.2   | 4.7   | 0.9   | 3.0   | 6.2   | 5.8   | 3.6   | 1.1    | 0.0   | 0.8   | 4.8   |
| 41      | 5.5   | 7.4   | 9.1   | 18.7  | 8.6    | 0.4   | 9.7   | 7.3   | 8.4   | 4.2   | 9.2   | 4.1   | 7.4   | 5.2   | 10.0  | 4.2   | 3.4    | 0.0   | 3.9   | 10.1  |
| 45      | 8.7   | 2.6   | 5.2   | 17.9  | 6.9    | 1.1   | 6.9   | 5.1   | 10.3  | 11.2  | 10.3  | 5.7   | 11.4  | 6.8   | 6.2   | 7.0   | 5.7    | 3.0   | 3.7   | 4.1   |
| 53      | 1.7   | 7.8   | 8.7   | 31.1  | 10.4   | 8.5   | 9.6   | 5.7   | 7.6   | 8.9   | 3.3   | 1.2   | 4.6   | 5.0   | 7.6   | 2.8   | 1.8    | 0.0   | 1.2   | 8.2   |
| 55      | 1.4   | 15.4  | 17.0  | 4.8   | 3.4    | 0.0   | 1.5   | 4.8   | 3.8   | 4.7   | 4.8   | 3.3   | 5.3   | 1.2   | 5.3   | 3.5   | 3.1    | 0.0   | 5.6   | 8.6   |
| 58      | 8.7   | 12.8  | 8.7   | 3.0   | 2.5    | 0.9   | 3.3   | 5.1   | 3.6   | 2.1   | 14.4  | 1.1   | 5.9   | 2.6   | 3.5   | 1.6   | 1.5    | 0.0   | 1.3   | 3.2   |
| 66      | 14.0  | 19.5  | 7.4   | 2.4   | 5.6    | 5.8   | 3.9   | 19.8  | 7.7   | 11.7  | 12.5  | 10.1  | 7.5   | 3.5   | 4.4   | 8.9   | 0.0    | 3.8   | 1.5   | 2.9   |
| 75      | 8.3   | 4.3   | 10.1  | 4.0   | 2.8    | 1.3   | 4.2   | 5.2   | 2.5   | 0.6   | 1.1   | 2.0   | 4.3   | 4.2   | 1.4   | 1.5   | 0.9    | 0.0   | 0.6   | 2.4   |
| 77      | 141.4 | 144.5 | 7.9   | 18.8  | 11.7   | 10.7  | 42.2  | 48.1  | 19.7  | 4.5   | 93.0  | 15.0  | 15.8  | 9.9   | 7.7   | 5.5   | 4.5    | 8.1   | 1.8   | 9.0   |
| 78      | 100.9 | 54.8  | 25.0  | 13.9  | 13.8   | 8.1   | 13.8  | 11.6  | 12.8  | 4.8   | 39.4  | 7.6   | 9.8   | 5.1   | 4.7   | 4.2   | 5.0    | 7.9   | 0.0   | 6.9   |
| 81      | 22.3  | 383.9 | 8.4   | 17.5  | 15.6   | 10.9  | 36.4  | 53.3  | 24.7  | 4.0   | 134.8 | 13.9  | 5.5   | 6.6   | 5.3   | 4.1   | 4.5    | 2.3   | 5.3   | 2.4   |
| 86      | 14.8  | 13.8  | 0.0   | 12.6  | 3.8    | 4.9   | 2.4   | 3.1   | 1.9   | 3.3   | 26.7  | 3.6   | 11.9  | 1.8   | 0.8   | 4.5   | 2.7    | 0.0   | 1.7   | 3.4   |
| 87      | 25.3  | 33.9  | 31.5  | 39.0  | 4.8    | 1.5   | 3.0   | 8.4   | 13.7  | 1.4   | 20.4  | 3.8   | 5.3   | 7.7   | 4.6   | 6.8   | 7.6    | 0.0   | 2.6   | 7.5   |
| 89      | 42.4  | 17.6  | 117.0 | 16.1  | 15.7   | 5.1   | 11.8  | 10.7  | 12.1  | 9.0   | 15.8  | 6.0   | 6.0   | 5.6   | 5.9   | 4.1   | 6.7    | 5.7   | 3.4   | 10.7  |
| 90      | 6.5   | 17.9  | 0.0   | 1.1   | 1.9    | 2.7   | 8.4   | 5.0   | 5.3   | 8.9   | 18.5  | 5.3   | 6.6   | 9.4   | 4.4   | 4.0   | 3.1    | 4.2   | 1.9   | 4.1   |
| 109     | 17.2  | 30.9  | 117.0 | 13.2  | 7.4    | 3.8   | 9.7   | 5.3   | 13.8  | 1.2   | 12.1  | 1.3   | 0.9   | 0.8   | 3.8   | 1.5   | 1.4    | 0.0   | 4.9   | 4.7   |
| 112     | 12.7  | 9.0   | 23.2  | 60.6  | 10.6   | 11.3  | 10.6  | 7.9   | 18.6  | 55.5  | 8.8   | 3.8   | 4.8   | 5.5   | 6.8   | 5.7   | 0.6    | 8.2   | 1.8   | 1.5   |
| 116     | 12.3  | 13.3  | 15.6  | 13.4  | 17.7.4 | 24.4  | 27.0  | 14.2  | 49.9  | 12.9  | 14.0  | 3.3   | 10.3  | 12.6  | 4.9   | 9.9   | 5.3    | 7.5   | 4.1   | 14.9  |
| 119     | 3.2   | 4.8   | 7.9   | 12.1  | 3.4    | 0.0   | 4.9   | 5.6   | 7.7   | 16.0  | 6.4   | 0.2   | 5.3   | 6.1   | 2.3   | 2.9   | 2.0    | 0.0   | 0.5   | 3.1   |
| 120     | 4.7   | 5.3   | 0.8   | 3.0   | 71.3   | 29.5  | 3.8   | 5.5   | 1.2   | 5.3   | 5.3   | 1.9   | 5.3   | 11.3  | 9.1   | 10.5  | 3.8    | 0.0   | 0.8   | 2.0   |
| 125     | 4.7   | 10.2  | 9.4   | 11.6  | 7.6    | 29.5  | 19.8  | 20.7  | 4.8   | 5.5   | 3.2   | 4.9   | 8.3   | 12.0  | 10.3  | 8.3   | 4.9    | 6.6   | 10.8  | 25.0  |
| 130     | 7.0   | 9.8   | 0.0   | 5.8   | 12.0   | 6.0   | 12.9  | 18.6  | 17.4  | 6.8   | 8.0   | 3.6   | 7.2   | 5.4   | 16.0  | 10.1  | 4.2    | 7.1   | 3.4   | 5.9   |
| 134     | 2.9   | 1.4   | 0.0   | 6.0   | 1.6    | 1.5   | 12.8  | 3.3   | 14.5  | 13.6  | 1.1   | 2.9   | 7.8   | 4.1   | 3.1   | 1.5   | 2.4    | 0.0   | 1.5   | 18.7  |
| 137     | 32.0  | 40.5  | 11.4  | 11.5  | 41.5   | 10.3  | 98.0  | 6.7   | 119.0 | 42.1  | 19.2  | 1.9   | 6.0   | 23.9  | 21.3  | 3.0   | 5.1    | 8.8   | 7.5   | 34.0  |
| 141     | 21.9  | 53.1  | 10.6  | 23.1  | 20.5   | 5.3   | 28.8  | 15.0  | 29.4  | 18.9  | 30.3  | 12.0  | 6.1   | 11.5  | 13.0  | 7.1   | 6.1    | 7.2   | 2.1   | 13.7  |
| 144     | 58.0  | 56.9  | 6.0   | 14.0  | 13.0   | 6.5   | 40.8  | 59.3  | 39.2  | 15.4  | 81.4  | 7.9   | 8.2   | 11.4  | 11.2  | 6.8   | 11.9   | 14.7  | 8.9   | 9.5   |
| 149     | 141.4 | 383.9 | 7.6   | 25.2  | 18.4   | 5.5   | 53.4  | 37.1  | 3.6   | 5.4   | 164.6 | 13.3  | 9.1   | 22.6  | 2.4   | 4.0   | 5.5    | 11.3  | 1.5   | 6.1   |
| 150     | 14.3  | 17.0  | 7.8   | 6.2   | 2.4    | 7.9   | 4.2   | 85.5  | 4.5   | 4.8   | 19.9  | 2.3   | 7.7   | 22.9  | 18.6  | 6.0   | 8.7    | 13.9  | 5.5   | 20.3  |
| 154     | 3.8   | 19.2  | 16.2  | 12.6  | 64.2   | 19.0  | 50.4  | 23.2  | 14.8  | 42.1  | 1.9   | 6.7   | 9.2   | 13.0  | 9.5   | 4.7   | 9.3    | 18.4  | 6.2   | 6.0   |
| 159     | 3.6   | 18.9  | 9.3   | 5.6   | 78.8   | 11.7  | 45.3  | 13.8  | 119.0 | 115.5 | 4.8   | 4.2   | 11.3  | 5.6   | 12.3  | 1.9   | 1.8    | 8.6   | 2.3   | 29.3  |
| 161     | 2.4   | 6.7   | 11.1  | 38.1  | 100.2  | 9.6   | 20.4  | 6.0   | 60.8  | 84.3  | 5.5   | 2.2   | 7.7   | 3.7   | 10.2  | 3.5   | 3.8    | 0.5   | 3.1   | 6.6   |
| 167     | 11.5  | 30.0  | 8.7   | 8.3   | 87.6   | 16.1  | 53.7  | 12.1  | 73.6  | 115.5 | 13.0  | 10.2  | 7.7   | 11.6  | 17.0  | 12.5  | 7.6    | 9.1   | 9.8   | 9.9   |
| 169     | 7.7   | 24.1  | 10.4  | 18.8  | 17.7   | 4.9   | 90.7  | 46.3  | 54.3  | 11.5  | 18.3  | 3.4   | 7.6   | 9.3   | 19.4  | 5.8   | 8.6    | 7.1   | 2.7   | 14.2  |
| 170     | 11.3  | 34.7  | 33.8  | 35.8  | 16.1   | 9.2   | 20.7  | 31.5  | 15.5  | 22.2  | 14.0  | 8.6   | 4.4   | 3.0   | 4.7   | 1.6   | 4.0    | 1.9   | 4.1   | 5.5   |
| 174     | 112.8 | 46.9  | 3.9   | 18.7  | 4.9    | 6.5   | 26.1  | 85.5  | 23.3  | 6.1   | 164.6 | 9.4   | 25.9  | 11.9  | 3.9   | 5.3   | 11.1   | 8.3   | 10.1  | 11.7  |
| 182     | 27.2  | 22.1  | 6.6   | 3.3   | 5.5    | 4.4   | 4.7   | 8.4   | 11.6  | 6.2   | 30.2  | 27.2  | 13.0  | 4.4   | 1.5   | 2.7   | 8.8    | 5.1   | 1.7   | 1.7   |
| 186     | 14.6  | 11.9  | 1.9   | 6.7   | 1.2    | 3.8   | 2.8   | 17.5  | 6.5   | 4.2   | 8.0   | 38.3  | 45.5  | 8.7   | 3.6   | 4.8   | 6.1    | 3.8   | 3.3   | 4.4   |
| 187     | 9.5   | 20.3  | 2.8   | 5.0   | 3.2    | 0.8   | 4.4   | 20.4  | 5.4   | 4.8   | 17.1  | 22.5  | 70.3  | 1.9   | 3.4   | 4.3   | 8.4    | 6.8   | 1.0   | 3.0   |
| 197     | 6.4   | 12.1  | 2.9   | 10.0  | 5.6    | 6.6   | 28.5  | 44.2  | 14.1  | 8.4   | 8.7   | 6.3   | 22.7  | 51.8  | 12.9  | 15.0  | 31.6   | 9.8   | 16.3  | 19.0  |
| 198     | 5.5   | 12.8  | 3.6   | 6.8   | 5.6    | 11.4  | 13.0  | 30.9  | 14.2  | 8.2   | 15.5  | 6.8   | 15.8  | 51.8  | 16.6  | 8.0   | 29.0   | 18.1  | 21.8  | 15.3  |
| 201     | 14.2  | 30.4  | 11.7  | 12.2  | 4.1    | 10.8  | 12.0  | 16.8  | 12.7  | 8.6   | 21.4  | 6.0   | 15.9  | 17.5  | 7.8   | 8.2   | 15.6   | 28.8  | 14.4  | 12.8  |
| 209     | 22.8  | 7.6   | 2.1   | 6.8   | 12.3   | 7.0   | 82.4  | 6.8   | 9.6   | 6.8   | 15.3  | 4.0   | 10.4  | 49.9  | 40.3  | 5.3   | 1.5    | 20.0  | 10.8  | 22.7  |
| 212     | 7.5   | 14.5  | 6.1   | 4.6   | 4.0    | 5.2   | 20.0  | 3.7   | 19.1  | 5.1   | 6.9   | 4.3   | 2.8   | 7.0   | 15.9  | 3.4   | 8.3    | 2.4   | 4.5   | 13.8  |
| 215     | 5.3   | 19.9  | 17.9  | 15.9  | 22.8   | 14.1  | 20.8  | 10.7  | 109.1 | 14.1  | 10.1  | 3.5   | 13.6  | 10.0  | 11.7  | 18.0  | 11.4   | 3.6   | 3.9   | 11.3  |
| 216     | 6.0   | 3.0   | 0.8   | 3.8   | 11.3   | 11.7  | 4.0   | 0.8   | 8.2   | 17.7  | 11.7  | 2.1   | 4.7   | 5.2   | 115.3 | 3.7   | 1.9    | 12.0  | 3.8   | 31.9  |
| 219     | 4.6   | 3.5   | 7.6   | 2.4   | 95.7   | 14.6  | 36.4  | 13.7  | 21.2  | 15.2  | 3.5   | 1.8   | 6.6   | 13.4  | 33.1  | 16.6  | 1.3    | 8.3   | 1.3   | 4.5   |
| 220     | 6.6   | 15.6  | 2.9   | 7.6   | 6.0    | 9.0   | 9.8   | 12.0  | 4.4   | 2.3   | 7.2   | 2.0   | 3.4   | 7.3   | 115.3 | 9.3   | 6.2    | 1.9   | 5.5   | 16.2  |
| 225     | 2.5   | 5.3   | 4.9   | 5.1   | 12.7   | 25.2  | 13.2  | 28.6  | 7.3   | 4.7   | 6.5   | 3.0   | 5.2   | 13.3  | 9.1   | 531.4 | 91.7   | 48.7  | 15.6  | 33.4  |
| 238     | 3.3   | 6.6   | 0.0   | 0.0   | 1.5    | 3.0   | 9.4   | 4.0   | 9.0   | 2.4   | 4.6   | 2.6   | 5.1   | 7.9   | 12.7  | 39.9  | 140.7  | 30.1  | 15.0  | 11.7  |
| 239     | 1.3   | 13.7  | 6.4   | 2.7   | 1.5    | 8.2   | 2.6   | 33.5  | 5.3   | 3.7   | 6.0   | 3.2   | 12.2  | 17.7  | 6.7   | 7.3   | 27.5   | 86.2  | 37.7  | 25.2  |
| 241     | 5.1   | 12.5  | 8.6   | 2.1   | 5.6    | 5.3   | 2.1   | 9.2   | 4.4   | 3.2   | 6.6   | 3.5   | 2.9   | 12.6  | 6.3   | 20.9  | 33.4   | 28.4  | 11.1  | 18.5  |
| 250     | 16.0  | 5.5   | 7.4   | 9.5   | 6.9    | 3.8   | 5.5   | 16.7  | 8.1   | 6.8   | 15.1  | 7.6   | 5.0   | 18.1  | 6.6   | 10.0  | 22.1   | 16.0  | 28.5  | 18.6  |
| 253     | 13.4  | 13.5  | 10.6  | 4.2   | 3.9    | 9.5   | 14.4  | 18.2  | 11.2  | 5.5   | 14.2  | 5.4   | 12.0  | 19.4  | 9.1   | 8.6   | 28.9   | 86.2  | 21.1  | 11.8  |
| 262     | 2.1   | 5.3   | 1.4   | 3.8   | 2.0    | 0.0   | 2.3   | 9.5   | 0.8   | 0.8   | 3.4   | 7.3   | 1.5   | 12.5  | 1.9   | 1.6   | 19.2   | 82.4  | 11.0  | 6.1   |
| 265     | 3.0   | 8.2   | 0.0   | 8.2   | 5.7    | 0.0   | 7.0   | 4.8   | 6.9   | 7.0   | 8.2   | 4.8   | 8.1   | 11.1  | 4.0   | 10.6  | 32.5   | 64.8  | 58.7  | 9.4   |
| 268     | 7.7   | 11.7  | 5.7   | 10.3  | 2.9    | 4.0   | 10.0  | 12.8  | 12.2  | 6.4   | 7.6   | 3.8   | 5.9   | 17.7  | 3.9   | 9.7   | 11.4   | 47.1  | 58.7  | 9.0   |
| 276     | 3.3   | 7.0   | 0.0   | 2.0   | 1.7    | 7.1   | 6.6   | 3.5   | 6.0   | 2.0   | 2.3   | 3.1   | 3.2   | 11.8  | 13.5  | 42.7  | 9.2    | 23.3  | 19.5  | 10.6  |
| 277     | 5.8   | 5.4   | 6.2   | 2.0   | 11.9   | 11.9  | 15.4  | 7.3   | 12.9  | 5.1   | 5.8   | 1.9   | 2.5   | 7.6   | 50.8  | 61.4  | 23.5   | 6.7   | 11.3  | 25.9  |
| 283     | 6.7   | 9.3   | 9.7   | 4.5   | 6.6    | 6.6   | 26.5  | 10.1  | 15.1  | 28.5  | 8.4   | 0.8   | 5.7   | 9.7   | 19.9  | 9.4   | 3.8    | 3.9   | 4.8   | 8.0   |
| 285     | 4.3   | 3.5   | 5.6   | 2.7   | 5.0    | 0.0   | 1.9   | 9.9   | 3.1   | 6.1   | 9.9   | 3.2   | 4.6   | 4.5   | 4.6   | 9.2   | 8.8    | 3.5   | 6.0   | 3.7   |
| 287     | 7.6   | 6.9   | 4.3   | 7.9   | 3.8    | 14.3  | 13.2  | 5.9   | 9.6   | 7.2   | 8.8   | 3.8   | 9.0   | 2.7   | 48.5  | 12.3  | 9.9    | 4.1   | 7.3   | 60.8  |
| 288     | 8.4   | 5.8   | 4.7   | 4.0   | 11.0   | 6.8   | 14.0  | 11.3  | 5.0   | 6.5   | 6.9   | 3.9   | 7.9   | 14.6  | 52.1  | 133.1 | 7.7    | 6.8   | 15.3  | 54.7  |
| 291     | 5.3   | 2.3   | 0.4   | 1.4   | 8.8    | 3.3   | 17.3  | 0.9   | 14.1  | 6.2   | 5.4   | 6.2   | 1.7   | 5.3   | 64.3  | 6.0   | 11.1</ |       |       |       |

**Table S2. <sup>1</sup>H-<sup>13</sup>C average chemical shift perturbations from wildtype p38γ + ATP (Hz)**

| Residue | L77V  | M109L | M112L | M120L | L159V | L174V | V186A | L198V | M216L | L225V | I238L | M239L | M291L |
|---------|-------|-------|-------|-------|-------|-------|-------|-------|-------|-------|-------|-------|-------|
| 16      | 5.7   | 6.9   | 5.9   | 5.5   | 4.4   | 5.8   | 2.5   | 3.0   | 2.8   | 1.9   | 2.7   | 2.4   | 5.8   |
| 23      | 10.2  | 4.9   | 4.6   | 4.2   | 5.7   | 5.4   | 1.3   | 3.3   | 9.2   | 12.0  | 8.3   | 3.8   | 7.2   |
| 26      | 9.3   | 13.2  | 4.7   | 1.7   | 3.3   | 4.7   | 1.6   | 3.2   | 4.1   | 0.8   | 1.8   | 0.4   | 1.6   |
| 30      | 1.3   | 15.8  | 2.9   | 7.2   | 4.6   | 7.8   | 1.1   | 9.3   | 7.9   | 2.0   | 2.2   | 0.4   | 4.4   |
| 33      | 5.4   | 27.4  | 22.7  | 10.3  | 5.8   | 12.7  | 1.4   | 9.8   | 4.4   | 1.4   | 2.3   | 10.5  | 6.9   |
| 41      | 3.8   | 11.2  | 11.0  | 12.6  | 7.7   | 4.2   | 5.1   | 5.8   | 6.3   | 3.9   | 5.9   | 4.9   | 6.9   |
| 45      | 10.0  | 5.2   | 17.5  | 5.5   | 6.6   | 3.8   | 6.3   | 5.9   | 9.3   | 10.8  | 7.8   | 3.6   | 6.0   |
| 53      | 6.1   | 17.3  | 30.2  | 7.4   | 29.2  | 8.8   | 4.9   | 5.3   | 9.9   | 8.9   | 2.8   | 4.0   | 4.7   |
| 55      | 8.4   | 14.8  | 2.4   | 7.5   | 21.3  | 10.4  | 7.7   | 6.4   | 5.8   | 11.7  | 4.8   | 11.9  | 12.0  |
| 58      | 5.3   | 11.2  | 2.2   | 5.8   | 4.6   | 8.7   | 5.2   | 5.9   | 4.7   | 2.0   | 1.4   | 4.8   | 2.7   |
| 66      | 6.0   | 8.4   | 0.2   | 1.5   | 6.2   | 15.2  | 6.2   | 10.3  | 8.1   | 11.8  | 9.3   | 10.9  | 10.4  |
| 75      | 5.1   | 9.1   | 4.6   | 1.6   | 3.4   | 1.9   | 3.0   | 4.1   | 4.9   | 2.2   | 1.3   | 1.9   | 4.0   |
| 77      | 134.8 | 19.7  | 13.2  | 13.6  | 14.0  | 50.1  | 7.8   | 10.7  | 14.0  | 9.2   | 9.2   | 6.6   | 10.9  |
| 78      | 26.7  | 21.1  | 12.1  | 10.4  | 11.1  | 23.3  | 3.0   | 6.0   | 13.3  | 2.7   | 4.2   | 7.3   | 15.8  |
| 81      | 38.2  | 42.5  | 8.0   | 11.2  | 18.7  | 137.0 | 7.3   | 7.3   | 18.1  | 8.0   | 6.0   | 8.9   | 9.6   |
| 86      | 15.5  | 14.7  | 11.9  | 6.2   | 23.6  | 18.0  | 2.0   | 1.5   | 11.0  | 9.8   | 7.6   | 0.0   | 2.6   |
| 87      | 28.4  | 48.9  | 52.2  | 9.3   | 29.0  | 15.1  | 2.1   | 4.9   | 20.2  | 5.1   | 9.5   | 6.5   | 8.8   |
| 89      | 33.7  | 33.9  | 20.0  | 13.1  | 16.0  | 13.9  | 2.1   | 6.0   | 12.9  | 6.6   | 2.6   | 2.7   | 11.7  |
| 90      | 9.1   | 5.1   | 9.3   | 0.8   | 2.0   | 8.4   | 2.6   | 6.6   | 12.2  | 4.1   | 2.6   | 10.0  | 9.3   |
| 109     | 9.2   | 48.9  | 21.6  | 7.7   | 11.5  | 12.7  | 8.8   | 8.2   | 7.0   | 7.7   | 7.2   | 9.0   | 8.8   |
| 112     | 13.1  | 29.4  | 55.8  | 7.9   | 44.0  | 8.5   | 7.4   | 4.8   | 8.4   | 4.9   | 0.6   | 6.8   | 6.2   |
| 116     | 8.8   | 9.2   | 10.0  | 18.6  | 62.0  | 9.2   | 2.6   | 1.7   | 14.6  | 5.4   | 1.7   | 4.4   | 3.9   |
| 119     | 2.1   | 10.7  | 7.8   | 9.3   | 5.9   | 1.8   | 3.9   | 7.9   | 1.5   | 2.2   | 2.2   | 2.1   | 3.3   |
| 120     | 7.9   | 2.0   | 0.8   | 56.0  | 13.4  | 0.0   | 0.0   | 6.5   | 15.5  | 5.0   | 10.2  | 0.0   | 1.5   |
| 125     | 6.6   | 5.3   | 10.7  | 56.0  | 18.0  | 7.1   | 5.7   | 7.7   | 11.3  | 6.1   | 3.7   | 8.9   | 11.3  |
| 130     | 4.2   | 3.9   | 1.7   | 9.5   | 13.5  | 6.6   | 3.7   | 5.5   | 13.2  | 10.5  | 6.9   | 8.7   | 6.1   |
| 134     | 6.4   | 4.0   | 1.9   | 3.1   | 1.2   | 5.8   | 0.0   | 2.3   | 18.6  | 3.8   | 7.0   | 4.0   | 15.1  |
| 137     | 24.0  | 2.9   | 10.7  | 11.9  | 114.8 | 3.2   | 10.0  | 12.2  | 21.3  | 10.3  | 9.9   | 6.8   | 32.9  |
| 141     | 46.4  | 10.6  | 11.9  | 6.4   | 23.5  | 14.0  | 6.6   | 8.5   | 12.1  | 9.7   | 12.5  | 13.7  | 16.7  |
| 144     | 78.1  | 19.3  | 12.4  | 13.3  | 30.0  | 68.1  | 6.1   | 14.3  | 15.2  | 10.1  | 13.0  | 12.8  | 26.0  |
| 149     | 134.8 | 29.2  | 15.2  | 11.7  | 22.0  | 123.2 | 4.6   | 12.9  | 8.0   | 11.1  | 12.1  | 9.6   | 3.9   |
| 150     | 15.5  | 10.0  | 13.0  | 13.4  | 23.7  | 26.7  | 7.9   | 18.2  | 10.9  | 15.6  | 15.3  | 19.7  | 9.1   |
| 154     | 2.7   | 6.2   | 4.1   | 12.2  | 20.2  | 16.7  | 7.0   | 9.4   | 33.3  | 13.6  | 8.8   | 2.7   | 14.4  |
| 159     | 18.8  | 11.8  | 5.1   | 13.7  | 118.1 | 3.8   | 9.9   | 7.7   | 12.5  | 9.5   | 11.8  | 12.5  | 16.6  |
| 161     | 10.2  | 6.6   | 53.2  | 8.0   | 46.8  | 10.5  | 7.3   | 6.3   | 18.6  | 9.3   | 1.9   | 1.4   | 4.9   |
| 167     | 20.6  | 8.3   | 13.2  | 9.7   | 77.4  | 10.5  | 5.4   | 5.8   | 42.0  | 4.9   | 5.3   | 9.4   | 20.2  |
| 169     | 11.4  | 9.2   | 17.1  | 6.1   | 57.3  | 13.9  | 10.6  | 10.1  | 13.4  | 9.2   | 8.9   | 4.6   | 12.0  |
| 170     | 13.4  | 13.3  | 12.1  | 2.5   | 6.8   | 8.4   | 4.3   | 6.6   | 6.8   | 4.8   | 7.1   | 3.2   | 4.7   |
| 174     | 130.8 | 20.9  | 24.9  | 17.2  | 23.8  | 137.0 | 9.8   | 10.7  | 13.1  | 10.2  | 8.9   | 10.2  | 10.7  |
| 182     | 11.3  | 1.5   | 1.7   | 2.3   | 3.1   | 18.3  | 13.4  | 1.1   | 2.8   | 4.7   | 6.1   | 4.5   | 1.7   |
| 186     | 8.3   | 2.0   | 2.7   | 2.3   | 2.1   | 10.6  | 51.0  | 5.6   | 12.4  | 3.8   | 3.6   | 8.7   | 2.2   |
| 187     | 10.7  | 1.6   | 4.6   | 0.8   | 2.9   | 16.6  | 29.4  | 4.8   | 5.6   | 4.0   | 8.9   | 5.1   | 1.4   |
| 197     | 4.2   | 9.1   | 3.9   | 9.7   | 11.6  | 11.3  | 5.2   | 37.7  | 10.4  | 14.3  | 42.6  | 22.0  | 16.2  |
| 198     | 2.7   | 5.6   | 9.4   | 11.3  | 11.8  | 7.5   | 5.3   | 52.8  | 6.2   | 13.5  | 16.6  | 71.5  | 15.3  |
| 201     | 12.4  | 7.5   | 2.3   | 3.4   | 5.0   | 10.2  | 5.2   | 21.9  | 1.9   | 3.3   | 4.7   | 35.9  | 15.6  |
| 209     | 3.6   | 2.3   | 10.5  | 10.6  | 14.4  | 13.6  | 3.4   | 52.8  | 32.7  | 5.4   | 4.7   | 10.7  | 16.8  |
| 212     | 3.8   | 7.4   | 7.3   | 3.4   | 21.0  | 3.3   | 2.2   | 7.6   | 13.3  | 5.6   | 5.5   | 4.3   | 11.8  |
| 215     | 11.3  | 5.4   | 12.4  | 11.5  | 89.2  | 21.7  | 5.4   | 16.0  | 11.0  | 8.5   | 11.4  | 9.0   | 30.7  |
| 216     | 1.1   | 1.9   | 3.8   | 11.8  | 10.6  | 6.8   | 0.8   | 1.5   | 118.6 | 7.8   | 0.4   | 9.6   | 28.8  |
| 219     | 2.9   | 4.5   | 11.9  | 11.3  | 27.8  | 6.0   | 0.8   | 2.6   | 44.9  | 12.1  | 0.0   | 0.8   | 0.8   |
| 220     | 7.2   | 2.1   | 1.5   | 1.5   | 13.9  | 7.9   | 2.1   | 10.4  | 118.6 | 7.9   | 6.7   | 4.0   | 15.1  |
| 225     | 2.6   | 5.8   | 1.7   | 31.3  | 6.6   | 10.0  | 7.4   | 19.5  | 19.1  | 236.9 | 93.9  | 45.1  | 41.6  |
| 238     | 4.5   | 7.3   | 1.1   | 11.5  | 8.9   | 1.5   | 4.1   | 5.4   | 10.4  | 47.3  | 138.7 | 18.2  | 9.9   |
| 239     | 10.7  | 1.7   | 2.4   | 8.5   | 4.6   | 1.5   | 3.2   | 34.0  | 6.4   | 14.1  | 27.6  | 76.7  | 34.8  |
| 241     | 1.1   | 8.5   | 0.5   | 7.7   | 3.6   | 6.2   | 1.7   | 18.5  | 6.9   | 27.6  | 40.7  | 32.1  | 19.3  |
| 250     | 7.0   | 12.3  | 5.1   | 1.6   | 8.9   | 5.8   | 3.4   | 21.9  | 12.2  | 6.0   | 21.3  | 16.2  | 16.4  |
| 253     | 11.7  | 9.5   | 6.1   | 11.4  | 14.1  | 9.6   | 10.3  | 14.3  | 10.9  | 9.5   | 28.2  | 29.4  | 27.9  |
| 262     | 0.4   | 0.0   | 0.9   | 0.6   | 1.1   | 1.2   | 0.8   | 18.1  | 0.8   | 0.8   | 17.3  | 72.0  | 0.9   |
| 265     | 0.0   | 0.0   | 2.3   | 3.8   | 4.5   | 4.2   | 0.0   | 15.2  | 2.2   | 7.6   | 37.2  | 73.5  | 9.7   |
| 268     | 1.5   | 3.8   | 4.0   | 2.2   | 8.1   | 5.1   | 4.5   | 24.0  | 2.6   | 9.6   | 53.3  | 51.5  | 7.0   |
| 276     | 9.7   | 6.2   | 3.4   | 6.8   | 6.8   | 7.1   | 1.7   | 3.8   | 12.2  | 60.5  | 18.7  | 27.1  | 9.4   |
| 277     | 6.5   | 2.3   | 1.3   | 15.0  | 11.7  | 6.4   | 2.4   | 3.5   | 58.1  | 57.3  | 20.2  | 14.0  | 32.2  |
| 283     | 6.5   | 3.9   | 7.4   | 3.2   | 11.9  | 10.7  | 6.9   | 9.7   | 18.5  | 12.7  | 8.0   | 5.1   | 19.5  |
| 285     | 5.6   | 9.9   | 2.8   | 1.3   | 3.2   | 6.7   | 0.8   | 0.9   | 12.6  | 2.1   | 3.9   | 6.6   | 7.6   |
| 287     | 4.4   | 12.4  | 3.4   | 8.7   | 11.2  | 3.7   | 6.4   | 7.1   | 57.7  | 5.2   | 11.4  | 12.7  | 63.7  |
| 288     | 1.7   | 5.4   | 4.3   | 8.2   | 9.7   | 6.6   | 3.6   | 10.8  | 40.3  | 135.1 | 12.8  | 10.0  | 44.3  |
| 291     | 1.4   | 4.1   | 0.8   | 1.1   | 11.1  | 6.2   | 0.6   | 9.8   | 60.0  | 6.0   | 6.8   | 0.8   | 116.8 |
| 292     | 2.9   | 10.9  | 5.7   | 11.9  | 6.6   | 11.1  | 5.2   | 15.8  | 16.2  | 23.7  | 21.1  | 23.4  | 60.5  |
| 293     | 1.3   | 1.9   | 2.3   | 3.9   | 3.9   | 3.5   | 3.8   | 13.4  | 10.3  | 8.0   | 8.5   | 8.3   | 18.9  |
| 294     | 9.9   | 6.3   | 3.1   | 10.5  | 2.2   | 7.0   | 3.5   | 30.2  | 7.9   | 12.2  | 113.9 | 58.0  | 22.3  |
| 300     | 7.2   | 7.5   | 11.5  | 1.7   | 5.1   | 6.0   | 10.3  | 6.4   | 14.0  | 10.3  | 15.9  | 4.5   | 15.0  |
| 323     | 31.8  | 18.4  | 8.6   | 2.9   | 2.0   | 29.9  | 2.8   | 3.5   | 6.2   | 13.4  | 7.1   | 10.1  | 9.4   |
| 333     | 5.3   | 1.9   | 2.5   | 1.2   | 0.4   | 7.9   | 2.6   | 2.3   | 5.9   | 3.9   | 1.7   | 1.5   | 1.4   |
| 337     | 9.9   | 10.4  | 5.6   | 0.9   | 4.7   | 13.6  | 2.6   | 3.7   | 6.4   | 0.5   | 3.7   | 3.6   | 5.4   |
| 343     | 1.3   | 7.4   | 6.0   | 7.1   | 12.4  | 11.6  | 4.9   | 3.2   | 5.1   | 6.1   | 8.7   | 10.0  | 7.3   |
| 357     | 0.4   | 1.3   | 0.7   | 0.8   | 1.8   | 1.8   | 1.3   | 2.2   | 1.5   | 0.4   | 0.7   | 1.5   | 3.4   |
| 361     | 1.0   | 0.4   | 1.1   | 1.2   | 1.3   | 0.8   | 0.8   | 0.4   | 1.8   | 0.8   | 0.9   | 0.4   | 3.0   |
| 367     | 0.8   | 1.1   | 0.9   | 1.9   | 0.6   | 1.1   | 0.9   | 1.5   | 3.8   | 1.4   | 1.4   | 1.4   | 4.6   |

**Table S3. <sup>1</sup>H-<sup>13</sup>C average chemical shift perturbations from activated wildtype p38γ (Hz)**

| Residue | L77V  | M109L | M112L | M120L | L159V | L174V | V186A | L198V | M216L | L225V | I238L | M239L | M291L |
|---------|-------|-------|-------|-------|-------|-------|-------|-------|-------|-------|-------|-------|-------|
| 16      | 7.4   | 5.4   | 11.2  | 5.0   | 11.1  | 4.3   | 8.0   | 6.5   | 7.6   | 3.9   | 6.1   | 5.4   | 6.2   |
| 23      | 4.9   | 11.5  | 11.5  | 8.0   | 3.2   | 11.3  | 8.3   | 11.2  | 2.8   | 5.4   | 12.0  | 10.5  | 13.5  |
| 26      | 10.9  | 7.6   | 4.0   | 2.7   | 3.4   | 8.5   | 1.7   | 2.4   | 3.5   | 8.6   | 3.4   | 6.9   | 4.7   |
| 30      | 2.6   | 11.2  | 6.2   | 1.7   | 5.7   | 1.8   | 2.6   | 2.5   | 1.2   | 3.4   | 3.0   | 4.0   | 6.8   |
| 33      | 7.4   | 7.9   | 23.0  | 1.5   | 2.4   | 5.4   | 5.9   | 3.5   | 5.3   | 7.9   | 1.5   | 3.3   | 6.2   |
| 41      | 1.8   | 11.5  | 16.3  | 3.1   | 4.3   | 7.2   | 3.5   | 3.4   | 2.1   | 6.4   | 9.1   | 5.7   | 3.3   |
| 45      | 9.5   | 6.7   | 7.5   | 2.5   | 1.4   | 2.0   | 4.1   | 4.2   | 5.0   | 5.0   | 1.6   | 4.2   | 8.2   |
| 53      | 6.5   | 9.8   | 27.7  | 9.4   | 26.5  | 4.6   | 1.9   | 4.4   | 11.0  | 7.0   | 1.8   | 3.6   | 7.2   |
| 55      | 7.7   | 14.0  | 13.3  | 5.9   | 10.8  | 7.3   | 5.0   | 6.1   | 5.6   | 8.3   | 8.8   | 12.3  | 12.6  |
| 58      | 13.9  | 9.0   | 4.4   | 2.4   | 5.8   | 8.7   | 2.6   | 8.2   | 5.6   | 4.3   | 3.1   | 6.4   | 3.3   |
| 66      | 10.2  | 6.4   | 6.8   | 8.1   | 11.4  | 7.9   | 4.5   | 4.7   | 2.7   | 7.5   | 5.0   | 5.4   | 5.0   |
| 75      | 8.5   | 9.1   | 0.8   | 0.7   | 2.8   | 3.7   | 5.3   | 7.6   | 2.9   | 2.4   | 3.7   | 7.4   | 2.8   |
| 77      | 145.3 | 21.0  | 22.0  | 8.1   | 16.2  | 65.0  | 11.8  | 8.4   | 14.0  | 9.2   | 15.5  | 27.4  | 13.6  |
| 78      | 98.7  | 30.5  | 17.0  | 4.4   | 11.6  | 35.0  | 2.6   | 4.4   | 12.8  | 16.3  | 13.6  | 6.5   | 26.8  |
| 81      | 22.0  | 23.0  | 29.3  | 2.7   | 26.4  | 168.0 | 7.0   | 8.9   | 9.8   | 7.7   | 15.2  | 10.5  | 10.3  |
| 86      | 21.0  | 4.2   | 18.5  | 3.2   | 1.5   | 14.2  | 0.8   | 4.2   | 5.4   | 10.7  | 7.7   | 9.5   | 12.7  |
| 87      | 22.8  | 34.0  | 49.5  | 6.0   | 13.1  | 11.3  | 8.1   | 12.8  | 13.0  | 11.3  | 13.6  | 14.4  | 14.8  |
| 89      | 34.8  | 44.0  | 13.2  | 7.6   | 15.7  | 11.3  | 1.5   | 6.6   | 3.9   | 15.8  | 13.7  | 5.4   | 14.7  |
| 90      | 22.3  | 1.7   | 1.1   | 1.1   | 4.6   | 2.3   | 5.5   | 0.6   | 5.3   | 1.5   | 3.1   | 2.0   | 2.6   |
| 109     | 12.1  | 44.0  | 9.8   | 0.8   | 19.9  | 11.6  | 7.7   | 5.5   | 2.4   | 2.5   | 9.0   | 8.6   | 11.4  |
| 112     | 7.4   | 30.3  | 72.0  | 5.6   | 30.3  | 6.9   | 5.0   | 9.2   | 5.8   | 9.8   | 10.4  | 10.3  | 8.1   |
| 116     | 13.3  | 16.6  | 10.6  | 19.5  | 79.8  | 14.9  | 6.7   | 12.7  | 16.4  | 6.3   | 8.4   | 7.1   | 15.3  |
| 119     | 1.6   | 9.0   | 9.9   | 2.0   | 1.3   | 1.6   | 0.7   | 3.3   | 1.6   | 2.7   | 4.5   | 3.4   | 4.7   |
| 120     | 0.8   | 2.4   | 5.8   | 41.7  | 2.9   | 3.0   | 1.5   | 4.5   | 15.3  | 9.4   | 5.4   | 4.1   | 6.8   |
| 125     | 9.5   | 15.3  | 6.5   | 35.6  | 19.9  | 13.9  | 6.3   | 9.0   | 8.4   | 4.8   | 5.7   | 6.9   | 17.0  |
| 130     | 5.3   | 18.3  | 13.5  | 5.3   | 14.3  | 3.8   | 7.5   | 3.4   | 27.7  | 17.9  | 16.3  | 13.0  | 15.9  |
| 134     | 0.8   | 3.3   | 17.7  | 3.9   | 4.9   | 6.6   | 5.7   | 1.9   | 13.8  | 7.1   | 0.8   | 2.7   | 1.1   |
| 137     | 26.9  | 8.4   | 13.9  | 11.5  | 116.2 | 29.7  | 0.2   | 21.0  | 24.8  | 16.1  | 2.6   | 3.4   | 26.0  |
| 141     | 57.6  | 23.1  | 72.0  | 15.3  | 18.4  | 74.2  | 19.4  | 16.0  | 19.9  | 46.7  | 12.1  | 12.0  | 25.2  |
| 144     | 37.9  | 15.0  | 39.3  | 13.9  | 20.3  | 79.5  | 14.0  | 12.4  | 10.4  | 11.3  | 13.2  | 15.6  | 13.8  |
| 149     | 145.3 | 20.2  | 43.3  | 12.6  | 6.6   | 158.3 | 8.7   | 33.2  | 14.5  | 5.5   | 12.0  | 11.6  | 17.7  |
| 150     | 12.4  | 14.8  | 8.7   | 3.6   | 17.5  | 27.6  | 14.7  | 21.1  | 15.9  | 10.0  | 16.3  | 28.1  | 22.1  |
| 154     | 14.6  | 12.6  | 16.4  | 16.2  | 39.3  | 13.6  | 17.3  | 13.9  | 12.9  | 24.3  | 4.0   | 18.1  | 15.2  |
| 159     | 19.3  | 18.7  | 6.3   | 17.7  | 128.6 | 12.6  | 1.6   | 1.6   | 13.9  | 13.1  | 10.1  | 14.1  | 18.0  |
| 161     | 5.7   | 9.2   | 37.1  | 3.8   | 52.9  | 7.1   | 5.7   | 10.5  | 10.3  | 12.0  | 6.9   | 6.9   | 9.8   |
| 167     | 5.8   | 14.7  | 11.9  | 3.9   | 16.6  | 8.6   | 3.3   | 2.6   | 7.0   | 10.8  | 1.9   | 8.5   | 21.7  |
| 169     | 20.7  | 14.4  | 15.8  | 14.9  | 34.8  | 16.4  | 4.1   | 10.1  | 11.3  | 15.0  | 8.4   | 12.4  | 16.2  |
| 170     | 17.6  | 12.8  | 11.7  | 8.5   | 16.1  | 18.9  | 2.4   | 1.8   | 8.2   | 10.5  | 8.2   | 6.7   | 7.9   |
| 174     | 29.2  | 25.4  | 15.0  | 1.9   | 22.8  | 168.0 | 14.6  | 6.5   | 16.0  | 6.8   | 9.0   | 10.9  | 11.5  |
| 182     | 14.7  | 7.7   | 5.0   | 1.2   | 5.4   | 14.6  | 11.3  | 6.8   | 2.0   | 1.1   | 7.6   | 8.1   | 1.6   |
| 186     | 2.4   | 2.9   | 1.8   | 3.1   | 3.2   | 10.1  | 26.6  | 2.0   | 4.4   | 2.0   | 1.9   | 2.1   | 1.8   |
| 187     | 3.8   | 1.9   | 2.4   | 3.1   | 2.3   | 6.5   | 21.4  | 3.2   | 4.0   | 1.9   | 3.6   | 4.9   | 3.2   |
| 197     | 11.8  | 14.5  | 13.3  | 3.9   | 10.4  | 10.9  | 11.7  | 14.7  | 8.1   | 18.8  | 13.8  | 20.5  | 15.4  |
| 198     | 9.7   | 9.3   | 9.5   | 10.3  | 6.6   | 31.2  | 13.1  | 64.4  | 27.1  | 8.5   | 17.5  | 41.5  | 30.9  |
| 201     | 24.2  | 11.7  | 6.7   | 5.0   | 8.3   | 25.3  | 17.0  | 8.2   | 9.8   | 4.5   | 15.7  | 7.2   | 2.3   |
| 209     | 12.3  | 9.8   | 14.1  | 9.8   | 26.4  | 19.6  | 8.6   | 64.4  | 19.3  | 8.4   | 22.0  | 9.8   | 19.5  |
| 212     | 5.0   | 3.8   | 8.3   | 5.3   | 11.4  | 4.0   | 1.9   | 4.8   | 6.0   | 7.6   | 6.6   | 1.5   | 15.5  |
| 215     | 13.0  | 18.4  | 10.0  | 17.4  | 128.6 | 11.1  | 12.2  | 9.9   | 16.9  | 20.0  | 17.0  | 9.8   | 19.8  |
| 216     | 5.4   | 12.3  | 5.3   | 11.1  | 11.9  | 5.6   | 3.9   | 3.0   | 131.9 | 3.2   | 6.8   | 15.0  | 32.6  |
| 219     | 9.7   | 12.2  | 4.9   | 14.8  | 17.6  | 10.6  | 7.0   | 0.6   | 40.8  | 6.9   | 2.3   | 3.1   | 11.6  |
| 220     | 8.5   | 18.8  | 10.0  | 8.3   | 13.9  | 2.3   | 7.7   | 3.8   | 131.9 | 20.5  | 19.7  | 20.1  | 6.6   |
| 225     | 12.3  | 3.5   | 7.9   | 27.4  | 13.8  | 22.5  | 14.6  | 23.5  | 30.1  | 131.3 | 78.2  | 45.1  | 52.0  |
| 238     | 4.2   | 4.9   | 2.4   | 4.6   | 7.7   | 2.4   | 2.4   | 7.1   | 16.5  | 28.8  | 105.9 | 23.1  | 13.7  |
| 239     | 7.4   | 16.4  | 8.1   | 7.1   | 22.4  | 33.5  | 2.4   | 24.4  | 18.8  | 21.6  | 38.5  | 97.7  | 34.8  |
| 241     | 9.6   | 3.9   | 10.3  | 7.6   | 4.7   | 10.8  | 3.8   | 10.5  | 16.9  | 14.9  | 20.1  | 20.5  | 21.9  |
| 250     | 13.8  | 13.6  | 3.3   | 7.6   | 4.0   | 18.3  | 2.4   | 20.9  | 7.3   | 8.5   | 10.7  | 29.7  | 10.8  |
| 253     | 25.9  | 10.9  | 6.0   | 10.7  | 13.4  | 24.8  | 8.4   | 44.5  | 14.9  | 9.9   | 23.8  | 36.9  | 24.5  |
| 262     | 5.7   | 4.6   | 4.6   | 5.3   | 0.8   | 7.3   | 6.1   | 23.3  | 12.4  | 1.9   | 20.9  | 82.2  | 6.2   |
| 265     | 3.6   | 2.9   | 10.9  | 4.6   | 3.8   | 7.2   | 0.2   | 11.7  | 8.4   | 12.3  | 28.7  | 68.7  | 8.5   |
| 268     | 6.7   | 6.2   | 4.1   | 2.2   | 17.5  | 6.8   | 4.0   | 9.5   | 7.4   | 15.4  | 17.0  | 18.1  | 5.8   |
| 276     | 5.2   | 7.6   | 4.1   | 7.5   | 9.8   | 8.5   | 8.5   | 6.8   | 17.7  | 49.0  | 4.1   | 21.5  | 9.9   |
| 277     | 5.5   | 5.5   | 9.3   | 12.0  | 14.6  | 2.5   | 3.5   | 9.1   | 63.1  | 66.5  | 24.0  | 12.9  | 36.2  |
| 283     | 13.8  | 12.7  | 15.1  | 9.3   | 26.5  | 11.8  | 10.2  | 18.8  | 19.3  | 12.6  | 12.0  | 13.7  | 53.7  |
| 285     | 4.7   | 8.5   | 5.4   | 1.7   | 3.1   | 4.0   | 2.6   | 1.3   | 4.9   | 3.5   | 13.1  | 2.6   | 3.2   |
| 287     | 11.8  | 11.2  | 11.5  | 6.1   | 11.7  | 9.6   | 4.3   | 6.3   | 46.9  | 17.2  | 4.8   | 7.8   | 87.3  |
| 288     | 11.1  | 12.8  | 9.5   | 7.8   | 7.2   | 20.9  | 7.1   | 21.6  | 34.4  | 89.1  | 29.3  | 13.3  | 43.7  |
| 291     | 7.7   | 8.2   | 2.4   | 3.1   | 15.2  | 5.3   | 7.0   | 10.4  | 57.2  | 6.1   | 12.2  | 9.2   | 97.0  |
| 292     | 9.3   | 12.0  | 8.8   | 12.5  | 12.6  | 16.1  | 4.1   | 14.0  | 20.2  | 23.4  | 15.0  | 15.7  | 38.0  |
| 293     | 1.1   | 2.3   | 1.2   | 1.5   | 1.6   | 1.8   | 5.5   | 12.8  | 2.8   | 11.8  | 11.2  | 9.9   | 13.4  |
| 294     | 12.8  | 11.5  | 22.3  | 14.9  | 16.7  | 24.1  | 23.1  | 41.6  | 51.9  | 55.7  | 73.6  | 67.7  | 26.6  |
| 300     | 9.3   | 5.3   | 3.8   | 9.3   | 3.5   | 3.7   | 10.1  | 2.9   | 10.6  | 4.1   | 3.4   | 4.1   | 13.2  |
| 323     | 28.1  | 5.6   | 5.2   | 4.1   | 4.1   | 23.6  | 1.9   | 2.5   | 5.5   | 11.0  | 3.4   | 8.0   | 6.1   |
| 333     | 6.3   | 2.5   | 1.9   | 0.9   | 3.1   | 2.1   | 3.2   | 3.8   | 1.0   | 3.1   | 2.1   | 1.9   | 0.9   |
| 337     | 8.6   | 10.2  | 2.8   | 3.7   | 4.4   | 8.2   | 5.1   | 5.7   | 1.1   | 1.7   | 5.4   | 3.1   | 6.9   |
| 343     | 7.9   | 3.3   | 7.0   | 1.5   | 6.3   | 2.8   | 4.6   | 2.6   | 6.5   | 5.2   | 1.5   | 3.6   | 10.9  |
| 357     | 1.7   | 1.2   | 1.6   | 3.1   | 3.6   | 1.7   | 3.0   | 1.5   | 1.8   | 1.0   | 3.5   | 2.6   | 2.0   |
| 361     | 0.5   | 0.8   | 2.6   | 1.0   | 1.6   | 1.3   | 1.0   | 0.5   | 0.4   | 0.8   | 0.6   | 1.4   | 1.2   |
| 367     | 1.0   | 1.5   | 1.0   | 1.6   | 0.8   | 1.7   | 1.0   | 1.2   | 1.7   | 0.8   | 0.3   | 0.8   | 1.1   |

**Table S4. <sup>1</sup>H-<sup>13</sup>C average chemical shift perturbations from wildtype p38γ + BIRB796 (Hz)**

| Residue | L77V | M109L | M112L | M120L | L159V | L174V | V186A | L198V | M216L | L225V | M239L | M291L |
|---------|------|-------|-------|-------|-------|-------|-------|-------|-------|-------|-------|-------|
| 16      | 8.3  | 21.3  | 9.8   | 2.8   | 3.4   | 12.0  | 2.4   | 7.0   | 0.4   | 9.7   | 4.5   | 9.1   |
| 23      | 2.4  | 43.1  | 15.1  | 4.0   | 5.8   | 30.7  | 4.2   | 2.1   | 5.7   | 5.4   | 3.8   | 3.6   |
| 26      | 1.2  | 30.3  | 3.9   | 2.1   | 5.4   | 21.1  | 4.5   | 3.0   | 2.6   | 3.8   | 2.7   | 4.1   |
| 30      | 0.8  | 12.0  | 12.8  | 3.0   | 6.3   | 18.2  | 3.4   | 2.7   | 1.4   | 7.9   | 2.5   | 4.3   |
| 33      | 1.7  | 15.3  | 9.3   | 4.3   | 0.8   | 4.2   | 2.4   | 4.3   | 0.2   | 5.7   | 2.4   | 3.6   |
| 41      | 7.1  | 12.3  | 7.4   | 4.1   | 8.0   | 11.1  | 2.4   | 2.5   | 9.3   | 5.9   | 2.0   | 5.3   |
| 45      | 5.8  | 3.7   | 4.0   | 3.7   | 5.2   | 9.1   | 0.0   | 2.4   | 2.6   | 6.0   | 5.6   | 3.1   |
| 53      | 6.8  | 10.4  | 17.6  | 8.4   | 11.8  | 8.1   | 2.5   | 7.3   | 6.2   | 6.1   | 6.1   | 6.2   |
| 55      | 5.4  | 20.7  | 12.8  | 0.2   | 1.7   | 12.1  | 3.6   | 1.7   | 6.4   | 9.2   | 3.5   | 3.6   |
| 58      | 12.6 | 45.3  | 5.3   | 4.0   | 3.3   | 44.2  | 10.7  | 2.5   | 2.4   | 3.1   | 5.7   | 5.8   |
| 66      | 5.3  | 7.2   | 9.8   | 3.5   | 7.0   | 44.7  | 9.0   | 2.2   | 3.4   | 6.6   | 4.8   | 4.1   |
| 75      | 0.0  | 18.8  | 1.0   | 0.0   | 1.6   | 2.6   | 2.6   | 1.1   | 1.1   | 3.1   | 1.0   | 0.8   |
| 77      | 86.6 | 86.3  | 3.8   | 3.2   | 11.6  | 44.3  | 8.9   | 2.7   | 8.5   | 4.1   | 3.7   | 6.6   |
| 78      | 11.5 | 59.9  | 10.6  | 4.1   | 5.7   | 12.1  | 2.4   | 3.1   | 4.1   | 6.2   | 7.9   | 7.5   |
| 81      | 76.5 | 11.4  | 1.5   | 0.0   | 1.5   | 5.3   | 1.1   | 3.2   | 0.8   | 0.8   | 1.7   | 4.2   |
| 86      | 5.9  | 7.5   | 2.3   | 2.3   | 6.1   | 27.7  | 9.9   | 2.7   | 4.5   | 4.3   | 6.8   | 6.4   |
| 87      | 3.6  | 197.6 | 78.6  | 6.6   | 15.8  | 44.6  | 5.3   | 9.8   | 11.6  | 9.9   | 7.6   | 10.7  |
| 89      | 3.3  | 11.5  | 7.6   | 2.3   | 6.8   | 73.6  | 6.0   | 0.0   | 1.9   | 4.5   | 5.9   | 5.7   |
| 90      | 7.5  | 6.0   | 14.1  | 3.0   | 11.5  | 37.7  | 10.1  | 1.1   | 0.4   | 12.7  | 2.4   | 1.7   |
| 109     | 8.4  | 253.6 | 65.8  | 7.1   | 6.8   | 5.3   | 0.9   | 3.5   | 0.9   | 3.1   | 1.4   | 3.1   |
| 112     | 7.0  | 74.3  | 78.6  | 9.6   | 8.9   | 12.6  | 5.0   | 5.9   | 6.8   | 2.6   | 1.2   | 6.9   |
| 116     | 12.1 | 11.5  | 17.9  | 29.2  | 77.8  | 8.5   | 3.9   | 9.9   | 8.9   | 8.9   | 10.0  | 6.0   |
| 119     | 3.4  | 8.4   | 29.2  | 7.2   | 19.4  | 2.9   | 8.5   | 2.0   | 6.4   | 1.9   | 5.7   | 5.8   |
| 120     | 1.1  | 1.1   | 1.9   | 97.0  | 10.7  | 3.5   | 0.6   | 4.6   | 12.3  | 3.8   | 0.4   | 1.1   |
| 125     | 0.0  | 1.5   | 6.1   | 24.0  | 21.6  | 3.3   | 5.3   | 4.2   | 11.0  | 0.0   | 10.7  | 8.6   |
| 130     | 7.7  | 9.4   | 5.3   | 4.9   | 8.9   | 3.8   | 14.7  | 5.9   | 14.3  | 8.9   | 5.0   | 15.9  |
| 134     | 10.8 | 1.1   | 2.3   | 7.4   | 14.6  | 7.2   | 7.7   | 5.7   | 16.6  | 5.4   | 7.7   | 15.8  |
| 137     | 11.1 | 4.8   | 12.3  | 6.1   | 106.9 | 7.1   | 0.6   | 12.4  | 24.8  | 11.5  | 10.3  | 34.0  |
| 141     | 13.4 | 12.0  | 12.4  | 24.4  | 17.7  | 10.8  | 6.6   | 58.2  | 13.6  | 11.7  | 29.4  | 42.1  |
| 144     | 26.0 | 12.3  | 11.9  | 12.1  | 31.9  | 11.7  | 3.9   | 12.8  | 12.8  | 9.9   | 14.1  | 10.7  |
| 149     | 86.6 | 36.9  | 3.8   | 5.3   | 9.4   | 34.6  | 7.1   | 2.7   | 7.1   | 4.8   | 3.3   | 2.4   |
| 150     | 12.6 | 6.1   | 2.3   | 5.6   | 11.6  | 7.9   | 1.5   | 17.4  | 1.3   | 9.7   | 14.0  | 13.3  |
| 154     | 4.4  | 9.0   | 18.4  | 25.9  | 37.7  | 11.5  | 0.2   | 11.5  | 2.3   | 3.8   | 1.9   | 17.0  |
| 159     | 13.4 | 23.1  | 11.4  | 12.6  | 227.8 | 5.5   | 7.0   | 6.2   | 13.4  | 8.1   | 9.7   | 7.5   |
| 161     | 7.0  | 38.0  | 38.4  | 12.2  | 32.6  | 7.6   | 2.9   | 10.2  | 40.2  | 3.9   | 11.2  | 3.5   |
| 167     | 4.4  | 26.2  | 4.9   | 16.2  | 204.9 | 8.1   | 7.5   | 11.6  | 17.4  | 8.8   | 14.0  | 7.6   |
| 169     | 66.1 | 26.7  | 6.0   | 27.4  | 19.9  | 9.3   | 4.5   | 23.4  | 6.5   | 9.3   | 13.3  | 17.1  |
| 170     | 7.7  | 16.2  | 23.5  | 51.9  | 27.2  | 11.3  | 3.4   | 6.3   | 7.0   | 4.3   | 2.9   | 10.5  |
| 174     | 9.3  | 18.0  | 8.9   | 6.4   | 11.9  | 97.2  | 10.8  | 5.3   | 10.7  | 9.1   | 4.6   | 10.1  |
| 182     | 1.4  | 4.5   | 2.4   | 1.4   | 1.4   | 8.1   | 5.3   | 5.6   | 1.4   | 1.1   | 1.4   | 1.4   |
| 186     | 0.5  | 3.0   | 0.8   | 0.5   | 3.3   | 6.8   | 22.4  | 3.7   | 3.7   | 2.4   | 1.5   | 2.3   |
| 187     | 1.7  | 2.5   | 4.7   | 0.6   | 3.7   | 6.9   | 18.0  | 7.2   | 6.8   | 1.1   | 4.5   | 6.5   |
| 197     | 6.1  | 10.8  | 4.5   | 4.6   | 9.2   | 2.7   | 4.1   | 23.1  | 6.6   | 4.6   | 40.5  | 13.1  |
| 198     | 4.7  | 8.8   | 4.5   | 9.5   | 9.9   | 3.6   | 2.4   | 58.2  | 6.1   | 10.4  | 16.5  | 21.8  |
| 201     | 2.0  | 6.2   | 3.8   | 11.3  | 9.1   | 3.2   | 2.3   | 43.9  | 0.0   | 5.9   | 13.4  | 11.4  |
| 209     | 9.1  | 15.7  | 13.4  | 0.0   | 24.6  | 0.0   | 2.4   | 30.5  | 27.8  | 7.9   | 15.9  | 17.8  |
| 212     | 5.7  | 4.7   | 1.8   | 2.7   | 7.9   | 5.0   | 2.2   | 6.8   | 6.3   | 7.2   | 6.8   | 12.6  |
| 215     | 0.8  | 12.1  | 11.9  | 10.5  | 123.8 | 2.1   | 8.6   | 12.4  | 15.0  | 9.4   | 14.0  | 13.5  |
| 216     | 1.5  | 7.1   | 4.8   | 10.9  | 6.8   | 1.6   | 0.2   | 5.3   | 131.5 | 12.1  | 11.1  | 28.9  |
| 219     | 3.1  | 0.8   | 3.1   | 14.4  | 14.7  | 3.0   | 1.5   | 2.5   | 29.4  | 7.8   | 0.2   | 8.1   |
| 220     | 3.5  | 7.8   | 7.1   | 5.2   | 6.6   | 6.6   | 15.8  | 0.0   | 131.5 | 7.7   | 7.0   | 11.0  |
| 225     | 3.0  | 7.3   | 4.4   | 29.4  | 5.0   | 12.6  | 20.5  | 19.1  | 9.0   | 242.0 | 31.1  | 40.3  |
| 238     | 1.9  | 2.1   | 0.0   | 8.1   | 10.0  | 7.2   | 1.5   | 12.0  | 12.1  | 55.7  | 24.3  | 11.8  |
| 239     | 1.5  | 2.3   | 3.4   | 7.7   | 9.8   | 9.5   | 3.8   | 55.8  | 9.8   | 15.2  | 82.9  | 33.1  |
| 241     | 0.8  | 0.0   | 1.0   | 3.1   | 5.7   | 6.4   | 3.5   | 12.2  | 8.6   | 48.3  | 28.8  | 15.0  |
| 250     | 4.2  | 8.7   | 5.4   | 5.3   | 4.5   | 4.0   | 3.9   | 13.4  | 1.7   | 12.7  | 15.1  | 18.6  |
| 253     | 2.3  | 8.4   | 9.7   | 11.0  | 8.4   | 7.4   | 10.2  | 24.9  | 2.3   | 5.6   | 62.4  | 24.0  |
| 262     | 0.0  | 0.0   | 0.0   | 1.3   | 6.2   | 3.5   | 0.0   | 19.7  | 4.2   | 1.7   | 82.9  | 7.0   |
| 265     | 4.6  | 8.1   | 6.7   | 3.0   | 9.0   | 4.8   | 7.1   | 29.2  | 0.8   | 15.8  | 61.6  | 14.6  |
| 268     | 9.5  | 5.7   | 3.8   | 6.6   | 10.7  | 9.6   | 4.9   | 11.9  | 5.6   | 7.4   | 38.8  | 12.0  |
| 276     | 1.9  | 1.1   | 0.0   | 6.8   | 7.5   | 2.9   | 0.8   | 5.4   | 17.6  | 42.3  | 19.8  | 15.5  |
| 277     | 5.4  | 9.7   | 7.7   | 10.2  | 9.6   | 4.4   | 6.4   | 6.6   | 49.4  | 23.4  | 14.1  | 36.7  |
| 283     | 1.7  | 5.6   | 6.6   | 7.2   | 11.4  | 1.9   | 2.4   | 7.3   | 24.2  | 6.2   | 5.1   | 11.4  |
| 285     | 8.3  | 0.1   | 1.6   | 2.5   | 5.3   | 1.6   | 0.7   | 0.1   | 2.0   | 9.4   | 0.6   | 7.4   |
| 287     | 7.9  | 5.9   | 7.8   | 4.5   | 2.6   | 3.1   | 6.1   | 9.6   | 49.9  | 4.7   | 13.4  | 75.0  |
| 288     | 3.8  | 5.8   | 5.3   | 6.8   | 5.5   | 6.4   | 10.3  | 12.4  | 44.1  | 139.4 | 9.5   | 42.9  |
| 291     | 5.9  | 3.2   | 3.9   | 4.0   | 11.9  | 2.4   | 3.4   | 8.0   | 54.4  | 5.9   | 5.7   | 80.0  |
| 292     | 3.7  | 10.1  | 9.7   | 9.8   | 15.2  | 7.5   | 3.5   | 6.8   | 24.2  | 18.2  | 27.5  | 26.3  |
| 293     | 2.5  | 4.1   | 1.1   | 0.8   | 4.2   | 2.2   | 1.2   | 9.2   | 5.9   | 11.4  | 7.8   | 17.1  |
| 294     | 3.7  | 6.4   | 6.6   | 12.5  | 10.2  | 6.9   | 11.7  | 20.8  | 7.3   | 12.0  | 54.9  | 21.3  |
| 300     | 4.7  | 9.4   | 3.7   | 1.6   | 3.9   | 5.0   | 13.0  | 5.3   | 5.4   | 7.1   | 4.0   | 10.0  |
| 323     | 6.2  | 7.4   | 9.4   | 6.0   | 10.9  | 15.6  | 6.2   | 14.1  | 6.0   | 6.8   | 8.5   | 5.3   |
| 333     | 13.0 | 8.9   | 3.6   | 3.4   | 1.6   | 7.4   | 8.0   | 5.7   | 5.9   | 6.7   | 1.2   | 4.1   |
| 337     | 2.0  | 22.3  | 2.7   | 6.5   | 0.7   | 6.0   | 1.4   | 5.4   | 5.2   | 4.4   | 2.4   | 10.2  |
| 343     | 14.4 | 25.6  | 5.3   | 2.7   | 7.3   | 22.6  | 1.7   | 7.7   | 2.8   | 0.9   | 5.2   | 5.4   |
| 357     | 0.0  | 0.0   | 0.7   | 0.0   | 0.0   | 3.0   | 0.8   | 3.0   | 0.0   | 5.7   | 0.8   | 2.1   |
| 361     | 0.0  | 1.5   | 0.6   | 0.0   | 0.5   | 0.4   | 0.5   | 0.0   | 0.4   | 3.3   | 0.0   | 5.8   |
| 367     | 1.9  | 3.5   | 2.0   | 0.0   | 0.9   | 0.0   | 0.0   | 1.1   | 0.0   | 6.5   | 1.3   | 3.0   |

**Table S5. <sup>1</sup>H, <sup>13</sup>C methyl chemical shift assignments for wildtype p38γ + ATP**

| Res      | ppm    | Res     | ppm    | Res      | ppm    | Res     | ppm    | Res      | ppm   | Res     | ppm    |
|----------|--------|---------|--------|----------|--------|---------|--------|----------|-------|---------|--------|
| 16.hg11  | 0.607  | 16.cg1  | 21.595 | 167.hd11 | 0.815  | 167.cd1 | 28.066 | 300.hg11 | 0.859 | 300.cg1 | 20.535 |
| 16.hg21  | 0.312  | 16.cg2  | 19.787 | 169.hd11 | 0.813  | 169.cd1 | 13.804 | 300.hg21 | 0.788 | 300.cg2 | 20.901 |
| 23.hg11  | 1.014  | 23.cg1  | 22.625 | 170.hd21 | 0.89   | 170.cd2 | 25.737 | 323.hg21 | 1.053 | 323.cg2 | 23.167 |
| 23.hg21  | 0.671  | 23.cg2  | 19.096 | 170.hd11 | 0.906  | 170.cd1 | 24.104 | 323.hg11 | 0.481 | 323.cg1 | 19.438 |
| 26.hg11  | 0.447  | 26.cg1  | 20.331 | 174.hd11 | 0.474  | 174.cd1 | 26.446 | 333.hg21 | 0.882 | 333.cg2 | 20.839 |
| 26.hg21  | 0.109  | 26.cg2  | 18.493 | 182.he1  | 1.964  | 182.ce  | 17.016 | 333.hg11 | 0.834 | 333.cg1 | 21.127 |
| 30.hd11  | 0.638  | 30.cd1  | 25.115 | 186.hg11 | 0.801  | 186.cg1 | 20.995 | 337.hd21 | 0.919 | 337.cd2 | 23.437 |
| 30.hd21  | 0.527  | 30.cd2  | 24.333 | 186.hg21 | 0.889  | 186.cg2 | 20.949 | 337.hd11 | 0.979 | 337.cd1 | 23.927 |
| 33.hg11  | 0.959  | 33.cg1  | 21.689 | 187.hg11 | 0.791  | 187.cg1 | 20.881 | 343.hg21 | 0.867 | 343.cg2 | 19.696 |
| 41.hg21  | 0.865  | 41.cg2  | 21.864 | 187.hg21 | 0.889  | 187.cg2 | 21.024 | 343.hg11 | 0.908 | 343.cg1 | 22.186 |
| 41.hg11  | 0.646  | 41.cg1  | 20.452 | 197.hd11 | 0.688  | 197.cd1 | 13.739 | 348.hg21 | 0.537 | 348.cg2 | 22.794 |
| 45.hg11  | 0.912  | 45.cg1  | 21.942 | 198.hd11 | 0.738  | 198.cd1 | 24.661 | 357.hd11 | 0.877 | 357.cd1 | 24.831 |
| 45.hg21  | 0.857  | 45.cg2  | 21.648 | 209.hd11 | 0.662  | 209.cd1 | 8.453  | 357.hd21 | 0.826 | 357.cd2 | 23.382 |
| 53.hg21  | 0.493  | 53.cg2  | 18.403 | 212.hg21 | 1.13   | 212.cg2 | 23.064 | 361.hg11 | 0.93  | 361.cg1 | 21.1   |
| 53.hg11  | 0.806  | 53.cg1  | 22.223 | 212.hg11 | 1.19   | 212.cg1 | 21.889 | 361.hg21 | 0.935 | 361.cg2 | 20.462 |
| 55.hd11  | 0.356  | 55.cd1  | 13.21  | 215.hd11 | 0.254  | 215.cd1 | 12.969 | 367.hd21 | 0.867 | 367.cd2 | 23.513 |
| 58.hd11  | 0.465  | 58.cd1  | 24.15  | 216.he1  | 1.531  | 216.ce  | 18.242 | 367.hd11 | 0.91  | 367.cd1 | 25.184 |
| 58.hd21  | 0.348  | 58.cd2  | 23.483 | 219.he1  | 1.994  | 219.ce  | 19.064 |          |       |         |        |
| 66.hd21  | 0.865  | 66.cd2  | 24.332 | 220.hd11 | 0.716  | 220.cd1 | 14.804 |          |       |         |        |
| 75.hd21  | 0.528  | 75.cd2  | 22.23  | 225.hd11 | 0.353  | 225.cd1 | 22.316 |          |       |         |        |
| 75.hd11  | 0.302  | 75.cd1  | 24.227 | 225.hd21 | 0.18   | 225.cd2 | 27.666 |          |       |         |        |
| 77.hd11  | -0.091 | 77.cd1  | 22.68  | 238.hd11 | 0.575  | 238.cd1 | 13.726 |          |       |         |        |
| 78.hd11  | 0.535  | 78.cd1  | 22.757 | 239.he1  | 2.001  | 239.ce  | 17.493 |          |       |         |        |
| 81.he1   | 1.76   | 81.ce   | 18.492 | 241.hg11 | 0.751  | 241.cg1 | 21.792 |          |       |         |        |
| 86.hg21  | 0.838  | 86.cg2  | 20.963 | 241.hg21 | 1.059  | 241.cg2 | 23.065 |          |       |         |        |
| 87.hd11  | 1.047  | 87.cd1  | 15.374 | 250.hg21 | 1.027  | 250.cg2 | 23.359 |          |       |         |        |
| 89.hd21  | 0.726  | 89.cd2  | 25.134 | 250.hg11 | 0.934  | 250.cg1 | 21.94  |          |       |         |        |
| 90.hd11  | 0.915  | 90.cd1  | 24.65  | 253.hd11 | 0.683  | 253.cd1 | 23.14  |          |       |         |        |
| 92.hg11  | 0.905  | 92.cg1  | 20.409 | 262.he1  | 2.064  | 262.ce  | 17.547 |          |       |         |        |
| 109.he1  | 1.923  | 109.ce  | 17.239 | 265.hd21 | 0.692  | 265.cd2 | 22.796 |          |       |         |        |
| 112.he1  | 1.694  | 112.ce  | 17.04  | 268.hd21 | 0.752  | 268.cd2 | 25.798 |          |       |         |        |
| 116.hd11 | 0.943  | 116.cd1 | 24.996 | 276.hd11 | 0.585  | 276.cd1 | 13.768 |          |       |         |        |
| 116.hd21 | 0.759  | 116.cd2 | 24.674 | 277.hd11 | 0.745  | 277.cd1 | 27.441 |          |       |         |        |
| 119.hd11 | 0.641  | 119.cd1 | 25.069 | 277.hd21 | 0.654  | 277.cd2 | 23.97  |          |       |         |        |
| 119.hd21 | 0.528  | 119.cd2 | 24.25  | 283.hd21 | 0.359  | 283.cd2 | 24.901 |          |       |         |        |
| 120.he1  | 1.891  | 120.ce  | 16.014 | 285.hg21 | 0.971  | 285.cg2 | 23.994 |          |       |         |        |
| 125.hd11 | 0.796  | 125.cd1 | 26.367 | 285.hg11 | 0.959  | 285.cg1 | 22.35  |          |       |         |        |
| 130.hd11 | 0.707  | 130.cd1 | 13.778 | 287.hd11 | 0.728  | 287.cd1 | 22.002 |          |       |         |        |
| 134.hg21 | 0.865  | 134.cg2 | 19.918 | 287.hd21 | 0.493  | 287.cd2 | 27.596 |          |       |         |        |
| 137.he1  | 1.779  | 137.ce  | 17.303 | 288.hd11 | 0.387  | 288.cd1 | 26.187 |          |       |         |        |
| 141.hd11 | 0.604  | 141.cd1 | 25.138 | 288.hd21 | -0.205 | 288.cd2 | 23.093 |          |       |         |        |
| 144.hd11 | 0.709  | 144.cd1 | 14.412 | 291.he1  | 1.907  | 291.ce  | 18.247 |          |       |         |        |
| 149.hd11 | 0.551  | 149.cd1 | 11.814 | 292.hd21 | 0.738  | 292.cd2 | 21.909 |          |       |         |        |
| 154.hd11 | 0.782  | 154.cd1 | 26.89  | 292.hd11 | 0.657  | 292.cd1 | 26.69  |          |       |         |        |
| 159.hd11 | 0.792  | 159.cd1 | 28.067 | 293.hg11 | 1.076  | 293.cg1 | 22.432 |          |       |         |        |
| 161.hg11 | 0.814  | 161.cg1 | 22.477 | 293.hg21 | 0.901  | 293.cg2 | 20.168 |          |       |         |        |
| 161.hg21 | 0.628  | 161.cg2 | 20.796 | 294.hd11 | 0.598  | 294.cd1 | 24.564 |          |       |         |        |
| 167.hd21 | 0.512  | 167.cd2 | 24.475 | 294.hd21 | 0.363  | 294.cd2 | 21.573 |          |       |         |        |



**Table S6. <sup>1</sup>H, <sup>13</sup>C methyl chemical shift assignments for activated wildtype p38γ**

| Res             | ppm   | Res            | ppm    | Res             | ppm    | Res            | ppm    | Res      | ppm   | Res     | ppm    |
|-----------------|-------|----------------|--------|-----------------|--------|----------------|--------|----------|-------|---------|--------|
| 16.hg11         | 0.622 | 16.cg1         | 21.416 | 167.hd11        | 0.825  | 167.cd1        | 27.88  | 300.hg11 | 0.863 | 300.cg1 | 20.341 |
| 16.hg21         | 0.333 | 16.cg2         | 19.724 | 169.hd11        | 0.833  | 169.cd1        | 13.843 | 300.hg21 | 0.804 | 300.cg2 | 20.929 |
| 23.hg11         | 1.029 | 23.cg1         | 22.578 | <u>170.hd21</u> | 0.881  | <u>170.cd2</u> | 25.634 | 323.hg21 | 1.067 | 323.cg2 | 23.072 |
| 23.hg21         | 0.697 | 23.cg2         | 18.953 | <u>170.hd11</u> | 0.855  | <u>170.cd1</u> | 23.718 | 323.hg11 | 0.466 | 323.cg1 | 19.246 |
| 26.hg11         | 0.473 | 26.cg1         | 20.304 | 174.hd11        | 0.533  | 174.cd1        | 26.55  | 333.hg21 | 0.889 | 333.cg2 | 20.78  |
| 26.hg21         | 0.103 | 26.cg2         | 18.295 | 182.he1         | 1.979  | 182.ce         | 16.911 | 333.hg11 | 0.845 | 333.cg1 | 21.024 |
| 30.hd11         | 0.657 | 30.cd1         | 25.012 | 186.hg11        | 0.815  | 186.cg1        | 20.962 | 337.hd21 | 0.921 | 337.cd2 | 23.239 |
| 30.hd21         | 0.54  | 30.cd2         | 24.239 | 186.hg21        | 0.897  | 186.cg2        | 20.844 | 337.hd11 | 0.983 | 337.cd1 | 23.838 |
| 33.hg11         | 0.982 | 33.cg1         | 21.026 | <u>187.hg11</u> | 0.798  | <u>187.cg1</u> | 20.838 | 343.hg21 | 0.875 | 343.cg2 | 19.761 |
| <u>41.hg21</u>  | 0.887 | <u>41.cg2</u>  | 21.656 | <u>187.hg21</u> | 0.901  | <u>187.cg2</u> | 20.896 | 343.hg11 | 0.907 | 343.cg1 | 21.75  |
| <u>41.hg11</u>  | 0.673 | <u>41.cg1</u>  | 20.387 | 197.hd11        | 0.704  | 197.cd1        | 13.676 | 348.hg21 | 0.541 | 348.cg2 | 22.376 |
| 45.hg11         | 0.919 | 45.cg1         | 21.767 | <u>198.hd11</u> | 0.725  | <u>198.cd1</u> | 24.382 | 357.hd11 | 0.889 | 357.cd1 | 24.723 |
| 45.hg21         | 0.893 | 45.cg2         | 21.437 | 209.hd11        | 0.669  | 209.cd1        | 8.269  | 357.hd21 | 0.836 | 357.cd2 | 23.285 |
| 53.hg21         | 0.496 | 53.cg2         | 18.318 | 212.hg21        | 1.151  | 212.cg2        | 22.951 | 361.hg11 | 0.937 | 361.cg1 | 20.98  |
| 53.hg11         | 0.835 | 53.cg1         | 22.366 | 212.hg11        | 1.199  | 212.cg1        | 21.732 | 361.hg21 | 0.944 | 361.cg2 | 20.338 |
| 55.hd11         | 0.388 | 55.cd1         | 13.09  | 215.hd11        | 0.29   | 215.cd1        | 13.087 | 367.hd21 | 0.879 | 367.cd2 | 23.425 |
| 58.hd11         | 0.482 | 58.cd1         | 23.931 | 216.he1         | 1.532  | 216.ce         | 18.146 | 367.hd11 | 0.92  | 367.cd1 | 25.016 |
| 58.hd21         | 0.346 | 58.cd2         | 23.486 | 219.he1         | 2.017  | 219.ce         | 18.906 |          |       |         |        |
| 66.hd21         | 0.869 | 66.cd2         | 24.262 | 220.hd11        | 0.731  | 220.cd1        | 14.641 |          |       |         |        |
| 75.hd21         | 0.537 | 75.cd2         | 22.082 | 225.hd11        | 0.366  | 225.cd1        | 22.353 |          |       |         |        |
| 75.hd11         | 0.32  | 75.cd1         | 24.177 | 225.hd21        | 0.192  | 225.cd2        | 27.319 |          |       |         |        |
| 77.hd11         | 0.018 | 77.cd1         | 22.707 | 238.hd11        | 0.586  | 238.cd1        | 13.575 |          |       |         |        |
| <u>78.hd11</u>  | 0.546 | <u>78.cd1</u>  | 22.461 | 239.he1         | 2.018  | 239.ce         | 17.339 |          |       |         |        |
| 81.he1          | 1.844 | 81.ce          | 18.536 | 241.hg11        | 0.77   | 241.cg1        | 21.664 |          |       |         |        |
| 86.hg21         | 0.834 | 86.cg2         | 21.061 | 241.hg21        | 1.06   | 241.cg2        | 22.98  |          |       |         |        |
| 87.hd11         | 1.025 | 87.cd1         | 14.907 | 250.hg21        | 1.033  | 250.cg2        | 23.294 |          |       |         |        |
| 89.hd21         | 0.724 | 89.cd2         | 25.111 | 250.hg11        | 0.943  | 250.cg1        | 21.82  |          |       |         |        |
| 90.hd11         | 0.925 | 90.cd1         | 24.445 | 253.hd11        | 0.693  | 253.cd1        | 23.119 |          |       |         |        |
| 92.hg11         | 0.908 | 92.cg1         | 20.318 | 262.he1         | 2.079  | 262.ce         | 17.448 |          |       |         |        |
| 109.he1         | 1.915 | 109.ce         | 17.037 | 265.hd21        | 0.708  | 265.cd2        | 22.72  |          |       |         |        |
| 112.he1         | 1.742 | 112.ce         | 17.608 | 268.hd21        | 0.774  | 268.cd2        | 25.675 |          |       |         |        |
| 116.hd11        | 0.96  | 116.cd1        | 24.914 | 276.hd11        | 0.604  | 276.cd1        | 13.53  |          |       |         |        |
| 116.hd21        | 0.771 | 116.cd2        | 25.011 | 277.hd11        | 0.759  | 277.cd1        | 27.256 |          |       |         |        |
| 119.hd11        | 0.654 | 119.cd1        | 24.873 | 277.hd21        | 0.666  | 277.cd2        | 23.863 |          |       |         |        |
| 119.hd21        | 0.542 | 119.cd2        | 24.152 | 283.hd21        | 0.386  | 283.cd2        | 24.643 |          |       |         |        |
| 120.he1         | 1.914 | 120.ce         | 15.936 | 285.hg21        | 0.98   | 285.cg2        | 23.906 |          |       |         |        |
| 125.hd11        | 0.817 | 125.cd1        | 26.298 | 285.hg11        | 0.954  | 285.cg1        | 22.3   |          |       |         |        |
| 130.hd11        | 0.721 | 130.cd1        | 13.704 | 287.hd11        | 0.743  | 287.cd1        | 21.965 |          |       |         |        |
| 134.hg21        | 0.877 | 134.cg2        | 19.971 | 287.hd21        | 0.501  | 287.cd2        | 27.413 |          |       |         |        |
| 137.he1         | 1.798 | 137.ce         | 17.39  | 288.hd11        | 0.401  | 288.cd1        | 26.088 |          |       |         |        |
| 141.hd11        | 0.529 | 141.cd1        | 25.225 | 288.hd21        | -0.188 | 288.cd2        | 22.998 |          |       |         |        |
| 144.hd11        | 0.665 | 144.cd1        | 14.371 | 291.he1         | 1.915  | 291.ce         | 18.19  |          |       |         |        |
| 149.hd11        | 0.592 | 149.cd1        | 11.514 | 292.hd21        | 0.758  | 292.cd2        | 21.841 |          |       |         |        |
| <u>154.hd11</u> | 0.805 | <u>154.cd1</u> | 26.715 | 292.hd11        | 0.664  | 292.cd1        | 26.815 |          |       |         |        |
| 159.hd11        | 0.819 | 159.cd1        | 27.719 | 293.hg11        | 1.085  | 293.cg1        | 22.336 |          |       |         |        |
| 161.hg11        | 0.837 | 161.cg1        | 22.49  | 293.hg21        | 0.901  | 293.cg2        | 20.102 |          |       |         |        |
| 161.hg21        | 0.623 | 161.cg2        | 20.772 | 294.hd11        | 0.606  | 294.cd1        | 24.415 |          |       |         |        |
| 167.hd21        | 0.557 | 167.cd2        | 24.391 | 294.hd21        | 0.377  | 294.cd2        | 21.653 |          |       |         |        |

\*Underline indicates methyls that are not stereospecifically assigned.

**Table S7. <sup>1</sup>H, <sup>13</sup>C methyl chemical shift assignments for wildtype p38γ + BIRB796**

| Res             | ppm   | Res            | ppm    | Res             | ppm    | Res            | ppm    | Res      | ppm   | Res     | ppm    |
|-----------------|-------|----------------|--------|-----------------|--------|----------------|--------|----------|-------|---------|--------|
| 16.hg11         | 0.647 | 16.cg1         | 21.321 | <u>170.hd21</u> | 0.815  | <u>170.cd2</u> | 25.297 | 333.hg21 | 0.881 | 333.cg2 | 20.757 |
| 16.hg21         | 0.386 | 16.cg2         | 19.948 | <u>170.hd11</u> | 0.831  | <u>170.cd1</u> | 23.686 | 333.hg11 | 0.849 | 333.cg1 | 20.957 |
| 23.hg11         | 1.049 | 23.cg1         | 21.834 | 174.hd11        | 0.579  | 174.cd1        | 26.009 | 337.hd21 | 0.928 | 337.cd2 | 23.421 |
| 23.hg21         | 0.724 | 23.cg2         | 18.854 | 182.he1         | 2.032  | 182.ce         | 16.857 | 337.hd11 | 0.966 | 337.cd1 | 23.841 |
| 26.hg11         | 0.535 | 26.cg1         | 20.555 | 186.hg11        | 0.755  | 186.cg1        | 20.911 | 343.hg21 | 0.893 | 343.cg2 | 19.425 |
| 26.hg21         | 0.028 | 26.cg2         | 17.799 | 186.hg21        | 0.874  | 186.cg2        | 20.74  | 343.hg11 | 0.904 | 343.cg1 | 21.931 |
| 30.hd11         | 0.653 | 30.cd1         | 25.132 | <u>187.hg11</u> | 0.748  | <u>187.cg1</u> | 21.022 | 348.hg21 | 0.563 | 348.cg2 | 22.502 |
| 30.hd21         | 0.535 | 30.cd2         | 24.161 | <u>187.hg21</u> | 0.866  | <u>187.cg2</u> | 20.709 | 357.hd11 | 0.88  | 357.cd1 | 24.724 |
| 33.hg11         | 0.999 | 33.cg1         | 21.309 | 197.hd11        | 0.697  | 197.cd1        | 13.657 | 357.hd21 | 0.826 | 357.cd2 | 23.262 |
| <u>41.hg21</u>  | 0.853 | <u>41.cg2</u>  | 21.573 | <u>198.hd11</u> | 0.724  | <u>198.cd1</u> | 24.536 | 361.hg11 | 0.93  | 361.cg1 | 21.101 |
| <u>41.hg11</u>  | 0.657 | <u>41.cg1</u>  | 20.352 | 209.hd11        | 0.662  | 209.cd1        | 8.192  | 361.hg21 | 0.929 | 361.cg2 | 20.363 |
| 45.hg11         | 0.906 | 45.cg1         | 21.805 | 212.hg21        | 1.154  | 212.cg2        | 22.902 | 367.hd21 | 0.86  | 367.cd2 | 23.373 |
| 45.hg21         | 0.875 | 45.cg2         | 21.665 | 212.hg11        | 1.19   | 212.cg1        | 21.788 | 367.hd11 | 0.907 | 367.cd1 | 25.045 |
| 53.hg21         | 0.498 | 53.cg2         | 18.426 | 215.hd11        | 0.291  | 215.cd1        | 13.11  |          |       |         |        |
| 53.hg11         | 0.858 | 53.cg1         | 22.188 | 216.he1         | 1.514  | 216.ce         | 18.146 |          |       |         |        |
| 55.hd11         | 0.379 | 55.cd1         | 12.872 | 219.he1         | 2.009  | 219.ce         | 18.966 |          |       |         |        |
| 58.hd11         | 0.452 | 58.cd1         | 24.133 | 220.hd11        | 0.724  | 220.cd1        | 14.736 |          |       |         |        |
| 58.hd21         | 0.297 | 58.cd2         | 23.56  | 225.hd11        | 0.348  | 225.cd1        | 22.357 |          |       |         |        |
| 66.hd21         | 0.838 | 66.cd2         | 24.557 | 225.hd21        | 0.187  | 225.cd2        | 27.4   |          |       |         |        |
| 75.hd21         | 0.52  | 75.cd2         | 21.878 | 238.hd11        | 0.57   | 238.cd1        | 13.613 |          |       |         |        |
| 75.hd11         | 0.303 | 75.cd1         | 24.31  | 239.he1         | 2.045  | 239.ce         | 17.328 |          |       |         |        |
| 77.hd11         | 0.364 | 77.cd1         | 24.271 | 241.hg11        | 0.756  | 241.cg1        | 21.651 |          |       |         |        |
| <u>78.hd11</u>  | 0.501 | <u>78.cd1</u>  | 23.158 | 241.hg21        | 1.05   | 241.cg2        | 22.923 |          |       |         |        |
| 81.he1          | 2.08  | 81.ce          | 19.084 | 250.hg21        | 1.005  | 250.cg2        | 23.329 |          |       |         |        |
| 86.hg21         | 0.817 | 86.cg2         | 20.974 | 250.hg11        | 0.935  | 250.cg1        | 21.881 |          |       |         |        |
| 87.hd11         | 1.194 | 87.cd1         | 15.333 | 253.hd11        | 0.668  | 253.cd1        | 23.252 |          |       |         |        |
| 89.hd21         | 0.724 | 89.cd2         | 24.954 | 262.he1         | 2.064  | 262.ce         | 17.437 |          |       |         |        |
| 90.hd11         | 0.92  | 90.cd1         | 24.245 | 265.hd21        | 0.691  | 265.cd2        | 22.622 |          |       |         |        |
| 92.hg11         | 0.904 | 92.cg1         | 20.321 | 268.hd21        | 0.772  | 268.cd2        | 25.765 |          |       |         |        |
| 109.he1         | 1.618 | 109.ce         | 14.923 | 276.hd11        | 0.566  | 276.cd1        | 13.589 |          |       |         |        |
| 112.he1         | 1.712 | 112.ce         | 17.005 | 277.hd11        | 0.749  | 277.cd1        | 27.349 |          |       |         |        |
| 116.hd11        | 0.955 | 116.cd1        | 24.697 | 277.hd21        | 0.657  | 277.cd2        | 23.9   |          |       |         |        |
| 116.hd21        | 0.767 | 116.cd2        | 24.792 | 283.hd21        | 0.364  | 283.cd2        | 24.79  |          |       |         |        |
| 119.hd11        | 0.646 | 119.cd1        | 24.922 | 285.hg21        | 0.966  | 285.cg2        | 23.961 |          |       |         |        |
| 119.hd21        | 0.551 | 119.cd2        | 24.303 | 285.hg11        | 0.974  | 285.cg1        | 21.785 |          |       |         |        |
| 120.he1         | 1.907 | 120.ce         | 15.917 | 287.hd11        | 0.738  | 287.cd1        | 21.883 |          |       |         |        |
| 125.hd11        | 0.808 | 125.cd1        | 26.234 | 287.hd21        | 0.489  | 287.cd2        | 27.368 |          |       |         |        |
| 130.hd11        | 0.721 | 130.cd1        | 13.664 | 288.hd11        | 0.4    | 288.cd1        | 26.079 |          |       |         |        |
| 134.hg21        | 0.883 | 134.cg2        | 19.576 | 288.hd21        | -0.204 | 288.cd2        | 22.971 |          |       |         |        |
| 137.he1         | 1.797 | 137.ce         | 17.384 | 291.he1         | 1.901  | 291.ce         | 18.183 |          |       |         |        |
| 141.hd11        | 0.45  | 141.cd1        | 25.099 | 292.hd21        | 0.747  | 292.cd2        | 21.785 |          |       |         |        |
| 144.hd11        | 0.632 | 144.cd1        | 13.736 | 292.hd11        | 0.673  | 292.cd1        | 26.557 |          |       |         |        |
| 149.hd11        | 0.625 | 149.cd1        | 13.064 | 293.hg11        | 1.068  | 293.cg1        | 22.421 |          |       |         |        |
| <u>154.hd11</u> | 0.771 | <u>154.cd1</u> | 26.641 | 293.hg21        | 0.903  | 293.cg2        | 20.096 |          |       |         |        |
| 159.hd11        | 0.798 | 159.cd1        | 27.793 | 294.hd11        | 0.588  | 294.cd1        | 24.429 |          |       |         |        |
| 161.hg11        | 0.743 | 161.cg1        | 22.261 | 294.hd21        | 0.333  | 294.cd2        | 21.366 |          |       |         |        |
| 161.hg21        | 0.672 | 161.cg2        | 21.21  | 300.hg11        | 0.868  | 300.cg1        | 20.246 |          |       |         |        |
| 167.hd21        | 0.582 | 167.cd2        | 24.869 | 300.hg21        | 0.793  | 300.cg2        | 20.97  |          |       |         |        |
| 167.hd11        | 0.821 | 167.cd1        | 27.868 | 323.hg21        | 1.045  | 323.cg2        | 22.956 |          |       |         |        |
| 169.hd11        | 0.758 | 169.cd1        | 13.656 | 323.hg11        | 0.546  | 323.cg1        | 19.454 |          |       |         |        |

\*Underline indicates methyls that are not stereospecifically assigned.

**\*For Tables S8, S10, S12, S13: Pairwise flow is given as X X Y (pairwise between X and Y residues), three-residue flow is given as X Y Z.**

**Table S8. Methyl 3-residue flow for apo inactive p38γ**

| First Res | Second Res | Third Res | Scaled Flow | First Res | Second Res | Third Res | Scaled Flow |
|-----------|------------|-----------|-------------|-----------|------------|-----------|-------------|
| V16       | V16        | V26       | 171.4       | V26       | L89        | L78       | 4349.0      |
| V16       | V16        | L78       | 134.3       | V26       | L89        | M109      | 4010.6      |
| V16       | V16        | M112      | 181.9       | V26       | L89        | L170      | 3602.3      |
| V16       | V16        | L116      | 60.2        | V26       | M109       | M81       | 4088.1      |
| V16       | V16        | L119      | 40.6        | V26       | M109       | L89       | 4350.7      |
| V16       | V16        | V343      | 50.1        | V26       | M109       | V343      | 3798.1      |
| V16       | V26        | L78       | 3552.0      | V26       | L116       | V53       | 3556.2      |
| V16       | L78        | V26       | 3333.8      | V26       | I149       | L78       | 2618.6      |
| V16       | L78        | V343      | 4521.1      | V26       | I149       | M81       | 2579.8      |
| V16       | V343       | L78       | 3591.7      | V26       | L170       | V53       | 4908.4      |
| V23       | V23        | L119      | 26.7        | V26       | L170       | L89       | 4415.5      |
| V26       | V26        | V16       | 171.4       | V26       | L337       | L58       | 3370.7      |
| V26       | V26        | V53       | 29.5        | V26       | V343       | L78       | 3766.0      |
| V26       | V26        | L58       | 87.9        | V26       | V343       | M109      | 3384.2      |
| V26       | V26        | L78       | 787.4       | L30       | L30        | V33       | 74.0        |
| V26       | V26        | M81       | 67.5        | L30       | L30        | L58       | 612.1       |
| V26       | V26        | L89       | 323.1       | L30       | L30        | L75       | 471.9       |
| V26       | V26        | M109      | 416.8       | L30       | L30        | L78       | 22.3        |
| V26       | V26        | M112      | 542.7       | L30       | L30        | I87       | 268.0       |
| V26       | V26        | L116      | 67.5        | L30       | L30        | L89       | 86.1        |
| V26       | V26        | L119      | 30.3        | L30       | L30        | L119      | 521.2       |
| V26       | V26        | I149      | 22.3        | L30       | L30        | V323      | 78.8        |
| V26       | V26        | L170      | 591.5       | L30       | L58        | L78       | 4755.5      |
| V26       | V26        | L337      | 75.4        | L30       | L58        | L89       | 4751.3      |
| V26       | V26        | V343      | 289.0       | L30       | L78        | L58       | 2018.5      |
| V26       | V53        | L116      | 2982.6      | L30       | L78        | L89       | 3581.8      |
| V26       | V53        | L170      | 2229.5      | L30       | I87        | L89       | 3816.5      |
| V26       | L58        | L89       | 2931.3      | L30       | I87        | V323      | 4226.8      |
| V26       | L58        | L337      | 3493.2      | L30       | L89        | L58       | 2687.1      |
| V26       | L78        | M81       | 5908.9      | L30       | L89        | L78       | 4772.4      |
| V26       | L78        | L89       | 5954.4      | L30       | L89        | I87       | 2834.9      |
| V26       | L78        | I149      | 6804.4      | L30       | V323       | I87       | 3076.3      |
| V26       | L78        | V343      | 5334.6      | V33       | L30        | L119      | 2960.1      |
| V26       | M81        | L78       | 2865.0      | V33       | V33        | L30       | 74.0        |
| V26       | M81        | M109      | 2501.7      | V33       | V33        | V41       | 34.7        |
| V26       | M81        | I149      | 3250.3      | V33       | V33        | V53       | 603.5       |
| V26       | L89        | L58       | 4154.1      | V33       | V33        | L119      | 100.7       |

| First Res | Second Res | Third Res | Scaled Flow |
|-----------|------------|-----------|-------------|
| V33       | V33        | M120      | 46.3        |
| V33       | V33        | V161      | 46.8        |
| V33       | V33        | I169      | 37.8        |
| V33       | V33        | L170      | 109.3       |
| V33       | V33        | I220      | 32.2        |
| V33       | V41        | I169      | 3011.9      |
| V33       | V53        | V161      | 7568.1      |
| V33       | L119       | L30       | 3184.6      |
| V33       | V161       | V53       | 3755.5      |
| V33       | I169       | V41       | 3065.2      |
| V41       | V33        | V53       | 2638.8      |
| V41       | V41        | V33       | 34.7        |
| V41       | V41        | V53       | 181.9       |
| V41       | V41        | I55       | 67.1        |
| V41       | V41        | L58       | 347.8       |
| V41       | V41        | I87       | 39.5        |
| V41       | V41        | L89       | 164.6       |
| V41       | V41        | M109      | 87.9        |
| V41       | V41        | L116      | 22.3        |
| V41       | V41        | L119      | 79.9        |
| V41       | V41        | M137      | 25.3        |
| V41       | V41        | L141      | 171.4       |
| V41       | V41        | V161      | 89.9        |
| V41       | V41        | I169      | 633.3       |
| V41       | V41        | L170      | 37.7        |
| V41       | V41        | V323      | 31.0        |
| V41       | V53        | V33       | 3881.9      |
| V41       | V53        | L116      | 4308.2      |
| V41       | V53        | V161      | 5420.8      |
| V41       | V53        | L170      | 3750.5      |
| V41       | L58        | I87       | 4559.8      |
| V41       | L58        | L89       | 3869.1      |
| V41       | L58        | V323      | 4030.6      |
| V41       | I87        | L58       | 2634.9      |
| V41       | I87        | L89       | 2730.7      |
| V41       | I87        | M109      | 2710.8      |
| V41       | I87        | V323      | 3339.3      |
| V41       | L89        | L58       | 3119.5      |
| V41       | L89        | I87       | 3810.0      |
| V41       | L89        | M109      | 4301.6      |
| V41       | L89        | L141      | 3570.3      |

| First Res | Second Res | Third Res | Scaled Flow |
|-----------|------------|-----------|-------------|
| V41       | L89        | L170      | 4457.9      |
| V41       | M109       | I87       | 3235.3      |
| V41       | M109       | L89       | 3679.4      |
| V41       | M109       | L170      | 3500.4      |
| V41       | L116       | V53       | 2679.1      |
| V41       | L116       | V161      | 2561.4      |
| V41       | M137       | L141      | 2567.1      |
| V41       | L141       | L89       | 3608.5      |
| V41       | L141       | M137      | 3961.8      |
| V41       | L141       | I169      | 3439.7      |
| V41       | L141       | L170      | 3584.4      |
| V41       | V161       | V53       | 4537.8      |
| V41       | V161       | L116      | 3447.9      |
| V41       | I169       | L141      | 5186.8      |
| V41       | L170       | V53       | 2591.1      |
| V41       | L170       | L89       | 3163.1      |
| V41       | L170       | M109      | 2903.7      |
| V41       | L170       | L141      | 2516.4      |
| V41       | V323       | L58       | 2215.3      |
| V41       | V323       | I87       | 3176.1      |
| V45       | V45        | L119      | 273.9       |
| V45       | V45        | V134      | 42.6        |
| V45       | V45        | L357      | 63.2        |
| V53       | V26        | M112      | 2558.7      |
| V53       | V26        | L170      | 2313.7      |
| V53       | V41        | I169      | 3335.9      |
| V53       | V53        | V26       | 29.5        |
| V53       | V53        | V33       | 603.5       |
| V53       | V53        | V41       | 181.9       |
| V53       | V53        | M112      | 161.3       |
| V53       | V53        | L116      | 827.3       |
| V53       | V53        | L119      | 72.4        |
| V53       | V53        | M137      | 164.6       |
| V53       | V53        | L154      | 168.0       |
| V53       | V53        | L159      | 480.3       |
| V53       | V53        | V161      | 4391.7      |
| V53       | V53        | I169      | 155.0       |
| V53       | V53        | L170      | 533.4       |
| V53       | V53        | I215      | 854.9       |
| V53       | M112       | V26       | 3771.2      |
| V53       | M137       | L159      | 3024.5      |

| First Res | Second Res | Third Res | Scaled Flow |
|-----------|------------|-----------|-------------|
| V53       | L159       | M137      | 4172.5      |
| V53       | I169       | V41       | 3196.8      |
| V53       | L170       | V26       | 4906.4      |
| I55       | I55        | V41       | 67.1        |
| I55       | I55        | L58       | 80.2        |
| L58       | V26        | L78       | 2858.3      |
| L58       | V26        | L170      | 3311.5      |
| L58       | L58        | V26       | 87.9        |
| L58       | L58        | L30       | 612.1       |
| L58       | L58        | V41       | 347.8       |
| L58       | L58        | I55       | 80.2        |
| L58       | L58        | L66       | 39.5        |
| L58       | L58        | L75       | 402.1       |
| L58       | L58        | L77       | 221.3       |
| L58       | L58        | L78       | 394.9       |
| L58       | L58        | M81       | 164.6       |
| L58       | L58        | I87       | 749.2       |
| L58       | L58        | L89       | 787.4       |
| L58       | L58        | M109      | 374.1       |
| L58       | L58        | L119      | 203.4       |
| L58       | L58        | L141      | 200.8       |
| L58       | L58        | I149      | 26.7        |
| L58       | L58        | I169      | 193.0       |
| L58       | L58        | L170      | 52.5        |
| L58       | L58        | L174      | 64.5        |
| L58       | L58        | V323      | 394.9       |
| L58       | L58        | L337      | 883.2       |
| L58       | L58        | V343      | 106.7       |
| L58       | L77        | L78       | 4275.9      |
| L58       | L77        | M81       | 4983.9      |
| L58       | L77        | L141      | 3384.4      |
| L58       | L77        | I149      | 5231.8      |
| L58       | L77        | L174      | 4563.2      |
| L58       | L78        | V26       | 4317.0      |
| L58       | L78        | L77       | 5095.1      |
| L58       | L78        | M81       | 4479.5      |
| L58       | L78        | L89       | 4490.0      |
| L58       | L78        | I149      | 5549.8      |
| L58       | L78        | V343      | 5222.6      |
| L58       | M81        | L77       | 4597.0      |
| L58       | M81        | L78       | 3467.4      |

| First Res | Second Res | Third Res | Scaled Flow |
|-----------|------------|-----------|-------------|
| L58       | M81        | I149      | 3705.9      |
| L58       | L89        | L78       | 5768.1      |
| L58       | L89        | M109      | 4794.9      |
| L58       | L89        | L141      | 4585.9      |
| L58       | L89        | L170      | 6165.0      |
| L58       | M109       | L89       | 3667.5      |
| L58       | M109       | L170      | 4382.7      |
| L58       | M109       | V343      | 4325.4      |
| L58       | L141       | L77       | 3293.6      |
| L58       | L141       | L89       | 2915.4      |
| L58       | L141       | I169      | 4096.9      |
| L58       | L141       | L170      | 3555.8      |
| L58       | I149       | L77       | 3192.2      |
| L58       | I149       | L78       | 2841.7      |
| L58       | I149       | M81       | 2451.5      |
| L58       | I149       | L174      | 2488.3      |
| L58       | I149       | V323      | 2517.1      |
| L58       | I169       | L141      | 4052.9      |
| L58       | L170       | V26       | 2947.0      |
| L58       | L170       | L89       | 2827.7      |
| L58       | L170       | M109      | 2628.2      |
| L58       | L170       | L141      | 2565.4      |
| L58       | L174       | L77       | 3352.8      |
| L58       | L174       | I149      | 2996.5      |
| L58       | V323       | I149      | 4915.7      |
| L58       | V343       | L78       | 3621.7      |
| L58       | V343       | M109      | 3052.6      |
| L66       | L66        | L58       | 39.5        |
| L66       | L66        | L77       | 82.4        |
| L66       | L66        | M81       | 46.7        |
| L66       | L66        | L90       | 58.9        |
| L66       | L66        | M182      | 300.0       |
| L66       | L66        | V186      | 28.0        |
| L66       | L66        | V187      | 80.6        |
| L66       | L66        | L357      | 120.2       |
| L66       | L77        | M81       | 4587.7      |
| L66       | M81        | L77       | 4042.9      |
| L66       | M182       | V187      | 4539.2      |
| L66       | V186       | V187      | 2964.4      |
| L66       | V187       | M182      | 3210.5      |
| L66       | V187       | V186      | 3718.3      |

| First Res | Second Res | Third Res | Scaled Flow |
|-----------|------------|-----------|-------------|
| L75       | L58        | L89       | 4100.7      |
| L75       | L75        | L30       | 471.9       |
| L75       | L75        | L58       | 402.1       |
| L75       | L75        | L77       | 148.8       |
| L75       | L75        | L78       | 221.3       |
| L75       | L75        | M81       | 64.5        |
| L75       | L75        | I87       | 289.0       |
| L75       | L75        | L89       | 131.6       |
| L75       | L75        | M109      | 37.7        |
| L75       | L75        | I149      | 58.9        |
| L75       | L75        | L170      | 26.0        |
| L75       | L75        | V323      | 126.2       |
| L75       | L77        | L78       | 4273.5      |
| L75       | L77        | M81       | 4995.4      |
| L75       | L77        | I149      | 4563.4      |
| L75       | L78        | L77       | 4757.4      |
| L75       | L78        | M81       | 4456.7      |
| L75       | L78        | L89       | 5026.9      |
| L75       | L78        | M109      | 4187.4      |
| L75       | L78        | I149      | 4570.5      |
| L75       | L78        | L170      | 3918.5      |
| L75       | M81        | L77       | 4086.1      |
| L75       | M81        | L78       | 3274.6      |
| L75       | M81        | M109      | 3181.3      |
| L75       | M81        | I149      | 2990.1      |
| L75       | M81        | L170      | 3024.8      |
| L75       | I87        | L89       | 3655.7      |
| L75       | I87        | M109      | 3967.2      |
| L75       | I87        | V323      | 4054.7      |
| L75       | L89        | L58       | 2977.8      |
| L75       | L89        | L78       | 4375.4      |
| L75       | L89        | I87       | 2944.4      |
| L75       | L89        | M109      | 4424.7      |
| L75       | L89        | L170      | 4394.6      |
| L75       | M109       | L78       | 2740.5      |
| L75       | M109       | M81       | 2833.7      |
| L75       | M109       | I87       | 2402.6      |
| L75       | M109       | L89       | 3327.0      |
| L75       | M109       | L170      | 3161.2      |
| L75       | I149       | L77       | 3658.0      |
| L75       | I149       | L78       | 3291.0      |

| First Res | Second Res | Third Res | Scaled Flow |
|-----------|------------|-----------|-------------|
| L75       | I149       | M81       | 2930.3      |
| L75       | I149       | V323      | 3069.2      |
| L75       | L170       | L78       | 2379.0      |
| L75       | L170       | M81       | 2499.3      |
| L75       | L170       | L89       | 3065.2      |
| L75       | L170       | M109      | 2932.4      |
| L75       | V323       | I87       | 3231.8      |
| L75       | V323       | I149      | 3671.5      |
| L77       | L58        | I87       | 3960.8      |
| L77       | L58        | L89       | 3553.2      |
| L77       | L58        | L337      | 4207.2      |
| L77       | L77        | L58       | 221.3       |
| L77       | L77        | L66       | 82.4        |
| L77       | L77        | L75       | 148.8       |
| L77       | L77        | L78       | 2422.5      |
| L77       | L77        | M81       | 3124.4      |
| L77       | L77        | V86       | 127.9       |
| L77       | L77        | I87       | 66.0        |
| L77       | L77        | L89       | 181.9       |
| L77       | L77        | L90       | 35.0        |
| L77       | L77        | M109      | 60.2        |
| L77       | L77        | L141      | 689.1       |
| L77       | L77        | I144      | 221.3       |
| L77       | L77        | I149      | 1918.7      |
| L77       | L77        | I169      | 37.7        |
| L77       | L77        | L170      | 52.5        |
| L77       | L77        | L174      | 1397.8      |
| L77       | L77        | M182      | 181.9       |
| L77       | L77        | V186      | 64.5        |
| L77       | L77        | V187      | 89.9        |
| L77       | L77        | V323      | 243.7       |
| L77       | L77        | L337      | 52.5        |
| L77       | L77        | V343      | 95.9        |
| L77       | L78        | L89       | 9852.7      |
| L77       | L78        | M109      | 7892.5      |
| L77       | L78        | L170      | 6965.0      |
| L77       | L78        | V343      | 9640.2      |
| L77       | M81        | M109      | 8115.1      |
| L77       | I87        | L58       | 2924.9      |
| L77       | I87        | L89       | 2872.6      |
| L77       | I87        | M109      | 2993.4      |

| First Res | Second Res | Third Res | Scaled Flow |
|-----------|------------|-----------|-------------|
| L77       | I87        | V323      | 3040.9      |
| L77       | L89        | L58       | 3366.0      |
| L77       | L89        | L78       | 3362.2      |
| L77       | L89        | I87       | 3685.0      |
| L77       | L89        | M109      | 4526.5      |
| L77       | L89        | L141      | 2960.2      |
| L77       | L89        | L170      | 4420.4      |
| L77       | L89        | V343      | 3493.5      |
| L77       | M109       | L78       | 2057.5      |
| L77       | M109       | M81       | 1732.9      |
| L77       | M109       | I87       | 2933.5      |
| L77       | M109       | L89       | 3457.9      |
| L77       | M109       | L170      | 3222.6      |
| L77       | M109       | V343      | 3263.8      |
| L77       | L141       | L89       | 4536.8      |
| L77       | L141       | I144      | 4687.8      |
| L77       | L141       | I169      | 6380.7      |
| L77       | I144       | L141      | 3228.8      |
| L77       | I169       | L141      | 2876.3      |
| L77       | L170       | L78       | 1761.6      |
| L77       | L170       | L89       | 3276.3      |
| L77       | L170       | M109      | 3126.6      |
| L77       | M182       | V187      | 4095.7      |
| L77       | V186       | V187      | 3290.5      |
| L77       | V187       | M182      | 3428.6      |
| L77       | V187       | V186      | 3551.4      |
| L77       | V323       | I87       | 4232.4      |
| L77       | L337       | L58       | 2954.0      |
| L77       | V343       | L78       | 2796.5      |
| L77       | V343       | L89       | 2969.8      |
| L77       | V343       | M109      | 3632.0      |
| L78       | L30        | L58       | 2346.8      |
| L78       | L30        | L75       | 2341.8      |
| L78       | L58        | L30       | 4746.8      |
| L78       | L58        | L337      | 3972.1      |
| L78       | L75        | L30       | 3975.2      |
| L78       | L77        | M81       | 6132.9      |
| L78       | L77        | L174      | 9326.3      |
| L78       | L78        | V16       | 134.3       |
| L78       | L78        | V26       | 787.4       |
| L78       | L78        | L30       | 22.3        |

| First Res | Second Res | Third Res | Scaled Flow |
|-----------|------------|-----------|-------------|
| L78       | L78        | L58       | 394.9       |
| L78       | L78        | L75       | 221.3       |
| L78       | L78        | L77       | 2422.5      |
| L78       | L78        | M81       | 1254.2      |
| L78       | L78        | V86       | 23.0        |
| L78       | L78        | I87       | 225.6       |
| L78       | L78        | L89       | 2954.7      |
| L78       | L78        | M109      | 749.2       |
| L78       | L78        | M112      | 128.9       |
| L78       | L78        | L116      | 89.9        |
| L78       | L78        | L141      | 394.9       |
| L78       | L78        | I144      | 39.5        |
| L78       | L78        | I149      | 1355.4      |
| L78       | L78        | L170      | 471.9       |
| L78       | L78        | L174      | 69.0        |
| L78       | L78        | M182      | 185.6       |
| L78       | L78        | V323      | 118.6       |
| L78       | L78        | L337      | 196.9       |
| L78       | L78        | V343      | 1890.5      |
| L78       | M81        | L77       | 4163.3      |
| L78       | I87        | V323      | 3916.1      |
| L78       | M112       | L170      | 2797.0      |
| L78       | L141       | I144      | 5175.1      |
| L78       | I144       | L141      | 2871.0      |
| L78       | I144       | L174      | 2937.0      |
| L78       | I149       | V323      | 5523.8      |
| L78       | L170       | M112      | 4085.6      |
| L78       | L174       | L77       | 2506.2      |
| L78       | L174       | I144      | 3314.3      |
| L78       | L174       | V323      | 2777.8      |
| L78       | V323       | I87       | 3302.8      |
| L78       | V323       | I149      | 2390.8      |
| L78       | V323       | L174      | 3157.7      |
| L78       | L337       | L58       | 3226.5      |
| M81       | V26        | L78       | 2362.6      |
| M81       | V26        | L170      | 2617.8      |
| M81       | L58        | I87       | 3656.5      |
| M81       | L58        | L89       | 3497.2      |
| M81       | L77        | L78       | 5844.2      |
| M81       | L77        | I149      | 7648.3      |
| M81       | L77        | L174      | 7813.7      |

| First Res | Second Res | Third Res | Scaled Flow |
|-----------|------------|-----------|-------------|
| M81       | L78        | V26       | 5998.5      |
| M81       | L78        | L77       | 3249.8      |
| M81       | L78        | L89       | 7695.5      |
| M81       | L78        | I149      | 4806.7      |
| M81       | L78        | V343      | 6962.0      |
| M81       | M81        | V26       | 67.5        |
| M81       | M81        | L58       | 164.6       |
| M81       | M81        | L66       | 46.7        |
| M81       | M81        | L75       | 64.5        |
| M81       | M81        | L77       | 3124.4      |
| M81       | M81        | L78       | 1254.2      |
| M81       | M81        | I87       | 87.9        |
| M81       | M81        | L89       | 145.8       |
| M81       | M81        | M109      | 533.4       |
| M81       | M81        | L116      | 21.7        |
| M81       | M81        | L141      | 463.7       |
| M81       | M81        | I144      | 95.9        |
| M81       | M81        | I149      | 471.9       |
| M81       | M81        | I169      | 73.8        |
| M81       | M81        | L170      | 360.7       |
| M81       | M81        | L174      | 283.6       |
| M81       | M81        | M182      | 69.0        |
| M81       | M81        | V323      | 128.9       |
| M81       | M81        | V343      | 126.2       |
| M81       | I87        | L58       | 3127.7      |
| M81       | I87        | L89       | 3047.5      |
| M81       | I87        | V323      | 3363.3      |
| M81       | L89        | L58       | 3387.9      |
| M81       | L89        | L78       | 3648.8      |
| M81       | L89        | I87       | 3451.5      |
| M81       | L89        | M109      | 3467.5      |
| M81       | L89        | L141      | 3083.3      |
| M81       | L89        | L170      | 3494.3      |
| M81       | L89        | V343      | 3274.6      |
| M81       | M109       | L89       | 5122.7      |
| M81       | M109       | V343      | 4537.8      |
| M81       | L141       | L89       | 4338.0      |
| M81       | L141       | I144      | 4865.9      |
| M81       | L141       | I169      | 5366.2      |
| M81       | I144       | L141      | 3117.0      |
| M81       | I144       | L174      | 2849.0      |

| First Res | Second Res | Third Res | Scaled Flow |
|-----------|------------|-----------|-------------|
| M81       | I149       | L77       | 2854.3      |
| M81       | I149       | L78       | 3226.0      |
| M81       | I149       | V323      | 4220.2      |
| M81       | I169       | L141      | 3233.1      |
| M81       | L170       | V26       | 4081.8      |
| M81       | L170       | L89       | 4525.8      |
| M81       | L174       | L77       | 2477.7      |
| M81       | L174       | I144      | 3801.7      |
| M81       | V323       | I87       | 3691.0      |
| M81       | V323       | I149      | 2889.1      |
| M81       | V343       | L78       | 3182.1      |
| M81       | V343       | L89       | 3156.6      |
| M81       | V343       | M109      | 2960.9      |
| V86       | L77        | L78       | 4948.0      |
| V86       | L77        | I149      | 4493.9      |
| V86       | L77        | L174      | 4339.9      |
| V86       | L78        | L77       | 3391.7      |
| V86       | L78        | I149      | 3219.6      |
| V86       | V86        | L77       | 127.9       |
| V86       | V86        | L78       | 23.0        |
| V86       | V86        | I149      | 50.2        |
| V86       | V86        | L174      | 34.3        |
| V86       | V86        | V186      | 63.2        |
| V86       | V86        | V323      | 57.7        |
| V86       | V86        | L357      | 119.9       |
| V86       | I149       | L77       | 3616.6      |
| V86       | I149       | L78       | 3780.1      |
| V86       | I149       | L174      | 2836.2      |
| V86       | I149       | V323      | 3202.5      |
| V86       | L174       | L77       | 3223.2      |
| V86       | L174       | I149      | 2617.3      |
| V86       | L174       | V186      | 2549.8      |
| V86       | L174       | V323      | 2715.4      |
| V86       | V186       | L174      | 2905.9      |
| V86       | V323       | I149      | 3300.8      |
| V86       | V323       | L174      | 3032.7      |
| I87       | L30        | L119      | 3703.2      |
| I87       | L77        | L78       | 3772.2      |
| I87       | L77        | M81       | 4250.0      |
| I87       | L77        | L141      | 3378.3      |
| I87       | L77        | I149      | 4221.9      |



| First Res | Second Res | Third Res | Scaled Flow |
|-----------|------------|-----------|-------------|
| 187       | L77        | L174      | 3980.1      |
| 187       | L78        | L77       | 5136.1      |
| 187       | L78        | M81       | 4339.8      |
| 187       | L78        | L89       | 4246.2      |
| 187       | L78        | L141      | 3665.7      |
| 187       | L78        | I149      | 4977.7      |
| 187       | L78        | V343      | 4095.9      |
| 187       | M81        | L77       | 4540.6      |
| 187       | M81        | L78       | 3405.3      |
| 187       | M81        | L141      | 3256.5      |
| 187       | M81        | I149      | 3394.6      |
| 187       | 187        | L30       | 268.0       |
| 187       | 187        | V41       | 39.5        |
| 187       | 187        | L58       | 749.2       |
| 187       | 187        | L75       | 289.0       |
| 187       | 187        | L77       | 66.0        |
| 187       | 187        | L78       | 225.6       |
| 187       | 187        | M81       | 87.9        |
| 187       | 187        | L89       | 633.3       |
| 187       | 187        | M109      | 471.9       |
| 187       | 187        | L119      | 74.0        |
| 187       | 187        | L141      | 35.0        |
| 187       | 187        | I149      | 21.7        |
| 187       | 187        | L174      | 22.3        |
| 187       | 187        | V323      | 927.3       |
| 187       | 187        | V343      | 347.8       |
| 187       | L89        | L78       | 5936.6      |
| 187       | L89        | M109      | 4390.7      |
| 187       | L89        | L141      | 5592.7      |
| 187       | M109       | L89       | 3950.4      |
| 187       | M109       | V343      | 3742.9      |
| 187       | L119       | L30       | 2658.2      |
| 187       | L141       | L77       | 2949.3      |
| 187       | L141       | L78       | 2350.4      |
| 187       | L141       | M81       | 2661.0      |
| 187       | L141       | L89       | 2564.9      |
| 187       | I149       | L77       | 3351.1      |
| 187       | I149       | L78       | 2901.8      |
| 187       | I149       | M81       | 2522.0      |
| 187       | I149       | L174      | 2610.7      |
| 187       | I149       | V323      | 2258.7      |

| First Res | Second Res | Third Res | Scaled Flow |
|-----------|------------|-----------|-------------|
| 187       | L174       | L77       | 3175.1      |
| 187       | L174       | I149      | 2623.8      |
| 187       | L174       | V323      | 1967.8      |
| 187       | V323       | I149      | 6317.6      |
| 187       | V323       | L174      | 5476.5      |
| 187       | V343       | L78       | 4660.2      |
| 187       | V343       | M109      | 3385.6      |
| L89       | L30        | L58       | 2409.3      |
| L89       | L30        | L75       | 2869.1      |
| L89       | L30        | L119      | 2895.2      |
| L89       | V41        | I169      | 3289.7      |
| L89       | L58        | L30       | 4698.5      |
| L89       | L75        | L30       | 3181.5      |
| L89       | L77        | L78       | 3038.4      |
| L89       | L77        | M81       | 4859.9      |
| L89       | L77        | I149      | 4413.9      |
| L89       | L78        | L77       | 10368.1     |
| L89       | L78        | M81       | 8669.9      |
| L89       | L78        | I149      | 9126.6      |
| L89       | L78        | V343      | 6789.7      |
| L89       | M81        | L77       | 4584.0      |
| L89       | M81        | L78       | 2396.5      |
| L89       | 187        | V323      | 4699.6      |
| L89       | L89        | V26       | 323.1       |
| L89       | L89        | L30       | 86.1        |
| L89       | L89        | V41       | 164.6       |
| L89       | L89        | L58       | 787.4       |
| L89       | L89        | L75       | 131.6       |
| L89       | L89        | L77       | 181.9       |
| L89       | L89        | L78       | 2954.7      |
| L89       | L89        | M81       | 145.8       |
| L89       | L89        | 187       | 633.3       |
| L89       | L89        | M109      | 1555.6      |
| L89       | L89        | M112      | 118.6       |
| L89       | L89        | L116      | 64.5        |
| L89       | L89        | L119      | 149.2       |
| L89       | L89        | M137      | 37.7        |
| L89       | L89        | L141      | 927.3       |
| L89       | L89        | I144      | 35.0        |
| L89       | L89        | I149      | 131.6       |
| L89       | L89        | I169      | 155.0       |

| First Res | Second Res | Third Res | Scaled Flow |
|-----------|------------|-----------|-------------|
| L89       | L89        | L170      | 1314.1      |
| L89       | L89        | M182      | 55.0        |
| L89       | L89        | V323      | 131.6       |
| L89       | L89        | V343      | 601.7       |
| L89       | L119       | L30       | 3318.3      |
| L89       | M137       | L141      | 2220.0      |
| L89       | L141       | M137      | 5561.3      |
| L89       | L141       | I144      | 6588.9      |
| L89       | L141       | I169      | 5797.0      |
| L89       | I144       | L141      | 2591.0      |
| L89       | I149       | L77       | 4055.5      |
| L89       | I149       | L78       | 2457.4      |
| L89       | I149       | V323      | 3411.2      |
| L89       | I169       | V41       | 3237.8      |
| L89       | I169       | L141      | 3209.8      |
| L89       | V323       | I87       | 2909.9      |
| L89       | V323       | I149      | 3411.2      |
| L89       | V343       | L78       | 2896.8      |
| L90       | L77        | L141      | 3026.7      |
| L90       | L77        | L174      | 3177.5      |
| L90       | L90        | L66       | 58.9        |
| L90       | L90        | L77       | 35.0        |
| L90       | L90        | L141      | 45.6        |
| L90       | L90        | I144      | 123.6       |
| L90       | L90        | L174      | 161.3       |
| L90       | L90        | M182      | 51.3        |
| L90       | L90        | V186      | 51.3        |
| L90       | L90        | V187      | 33.4        |
| L90       | L90        | V293      | 95.9        |
| L90       | L90        | L357      | 111.6       |
| L90       | L90        | V361      | 188.0       |
| L90       | L90        | L367      | 368.4       |
| L90       | L141       | L77       | 3198.3      |
| L90       | L141       | I144      | 3234.0      |
| L90       | I144       | L141      | 4067.7      |
| L90       | I144       | L174      | 3149.4      |
| L90       | L174       | L77       | 4522.0      |
| L90       | L174       | I144      | 3372.1      |
| L90       | M182       | V187      | 3604.3      |
| L90       | V186       | V187      | 3423.8      |
| L90       | V187       | M182      | 3293.1      |

| First Res | Second Res | Third Res | Scaled Flow |
|-----------|------------|-----------|-------------|
| L90       | V187       | V186      | 3128.2      |
| M109      | V26        | M112      | 4180.9      |
| M109      | V41        | I169      | 3313.1      |
| M109      | L77        | L78       | 3335.0      |
| M109      | L77        | M81       | 3649.2      |
| M109      | L77        | L141      | 2873.6      |
| M109      | L78        | L77       | 6914.4      |
| M109      | L78        | M81       | 4095.8      |
| M109      | L78        | L89       | 4329.9      |
| M109      | L78        | V343      | 4183.7      |
| M109      | M81        | L77       | 6656.5      |
| M109      | M81        | L78       | 3603.5      |
| M109      | I87        | V323      | 4668.0      |
| M109      | L89        | L78       | 6081.2      |
| M109      | L89        | L141      | 5493.1      |
| M109      | M109       | V26       | 416.8       |
| M109      | M109       | V41       | 87.9        |
| M109      | M109       | L58       | 374.1       |
| M109      | M109       | L75       | 37.7        |
| M109      | M109       | L77       | 60.2        |
| M109      | M109       | L78       | 749.2       |
| M109      | M109       | M81       | 533.4       |
| M109      | M109       | I87       | 471.9       |
| M109      | M109       | L89       | 1555.6      |
| M109      | M109       | M112      | 58.9        |
| M109      | M109       | L116      | 56.2        |
| M109      | M109       | L141      | 196.9       |
| M109      | M109       | I169      | 61.6        |
| M109      | M109       | L170      | 677.6       |
| M109      | M109       | V323      | 87.9        |
| M109      | M109       | V343      | 912.4       |
| M109      | M112       | V26       | 2482.1      |
| M109      | M112       | L170      | 2474.0      |
| M109      | L141       | L77       | 3843.4      |
| M109      | L141       | L89       | 2523.2      |
| M109      | L141       | I169      | 4570.2      |
| M109      | I169       | V41       | 3054.3      |
| M109      | I169       | L141      | 3434.2      |
| M109      | L170       | M112      | 4956.1      |
| M109      | V323       | I87       | 2911.9      |
| M109      | V343       | L78       | 4539.7      |

| First Res | Second Res | Third Res | Scaled Flow |
|-----------|------------|-----------|-------------|
| M112      | V26        | L78       | 4358.5      |
| M112      | V53        | L116      | 3603.7      |
| M112      | V53        | V161      | 5005.0      |
| M112      | V53        | I215      | 3956.3      |
| M112      | L78        | V26       | 2841.2      |
| M112      | L78        | L89       | 4597.7      |
| M112      | L78        | M109      | 3657.5      |
| M112      | L78        | V343      | 4220.2      |
| M112      | L89        | L78       | 4502.9      |
| M112      | L89        | M109      | 4202.2      |
| M112      | L89        | L141      | 3813.8      |
| M112      | L89        | L170      | 3127.3      |
| M112      | L89        | V343      | 3234.2      |
| M112      | M109       | L78       | 3041.5      |
| M112      | M109       | L89       | 3568.1      |
| M112      | M109       | L170      | 2457.3      |
| M112      | M109       | V343      | 3219.0      |
| M112      | M112       | V16       | 181.9       |
| M112      | M112       | V26       | 542.7       |
| M112      | M112       | V53       | 161.3       |
| M112      | M112       | L78       | 128.9       |
| M112      | M112       | L89       | 118.6       |
| M112      | M112       | M109      | 58.9        |
| M112      | M112       | L116      | 121.1       |
| M112      | M112       | L119      | 105.9       |
| M112      | M112       | M137      | 72.1        |
| M112      | M112       | L141      | 52.5        |
| M112      | M112       | V161      | 185.6       |
| M112      | M112       | L170      | 689.1       |
| M112      | M112       | I215      | 51.3        |
| M112      | M112       | V343      | 109.0       |
| M112      | L116       | V53       | 3348.1      |
| M112      | M137       | L141      | 3239.5      |
| M112      | L141       | L89       | 3157.7      |
| M112      | L141       | M137      | 3018.2      |
| M112      | V161       | V53       | 5195.6      |
| M112      | V161       | I215      | 4793.0      |
| M112      | L170       | L89       | 5354.2      |
| M112      | L170       | M109      | 4954.8      |
| M112      | I215       | V53       | 3012.5      |
| M112      | I215       | V161      | 3515.7      |

| First Res | Second Res | Third Res | Scaled Flow |
|-----------|------------|-----------|-------------|
| M112      | V343       | L78       | 4048.3      |
| M112      | V343       | L89       | 3167.8      |
| M112      | V343       | M109      | 3713.2      |
| L116      | V26        | L78       | 3232.4      |
| L116      | V26        | M109      | 2941.8      |
| L116      | V26        | M112      | 2899.6      |
| L116      | V26        | L170      | 2841.3      |
| L116      | V41        | I169      | 2590.1      |
| L116      | V53        | V161      | 6284.0      |
| L116      | L78        | V26       | 3453.7      |
| L116      | L78        | M81       | 4117.7      |
| L116      | L78        | L89       | 4515.9      |
| L116      | L78        | M109      | 3471.0      |
| L116      | L78        | L141      | 3185.5      |
| L116      | L78        | V343      | 4262.6      |
| L116      | M81        | L78       | 3043.6      |
| L116      | M81        | M109      | 2667.2      |
| L116      | M81        | L141      | 2695.3      |
| L116      | M81        | L170      | 2247.5      |
| L116      | L89        | L78       | 4184.1      |
| L116      | L89        | M109      | 3817.5      |
| L116      | L89        | L141      | 3591.6      |
| L116      | L89        | L170      | 3373.5      |
| L116      | L89        | V343      | 3229.8      |
| L116      | M109       | V26       | 2825.2      |
| L116      | M109       | L78       | 3120.0      |
| L116      | M109       | M81       | 3243.5      |
| L116      | M109       | L89       | 3703.5      |
| L116      | M109       | L170      | 2867.8      |
| L116      | M109       | V343      | 3437.2      |
| L116      | M112       | V26       | 3330.1      |
| L116      | M112       | L170      | 3168.2      |
| L116      | L116       | V16       | 60.2        |
| L116      | L116       | V26       | 67.5        |
| L116      | L116       | V41       | 22.3        |
| L116      | L116       | V53       | 827.3       |
| L116      | L116       | L78       | 89.9        |
| L116      | L116       | M81       | 21.7        |
| L116      | L116       | L89       | 64.5        |
| L116      | L116       | M109      | 56.2        |
| L116      | L116       | M112      | 121.1       |

| First Res | Second Res | Third Res | Scaled Flow |
|-----------|------------|-----------|-------------|
| L116      | L116       | L119      | 26.7        |
| L116      | L116       | M137      | 234.5       |
| L116      | L116       | L141      | 31.8        |
| L116      | L116       | L154      | 48.9        |
| L116      | L116       | L159      | 463.7       |
| L116      | L116       | V161      | 506.2       |
| L116      | L116       | I169      | 139.9       |
| L116      | L116       | L170      | 178.3       |
| L116      | L116       | I215      | 347.8       |
| L116      | L116       | M219      | 33.5        |
| L116      | L116       | V343      | 42.5        |
| L116      | M137       | L141      | 4115.9      |
| L116      | M137       | L159      | 3162.4      |
| L116      | L141       | L78       | 2538.4      |
| L116      | L141       | M81       | 2905.7      |
| L116      | L141       | L89       | 3088.9      |
| L116      | L141       | M137      | 2558.5      |
| L116      | L141       | I169      | 3227.9      |
| L116      | L141       | L170      | 2460.8      |
| L116      | L154       | L159      | 2408.2      |
| L116      | L159       | M137      | 3910.8      |
| L116      | L159       | L154      | 4377.3      |
| L116      | L159       | V161      | 3688.9      |
| L116      | V161       | V53       | 5213.1      |
| L116      | V161       | L159      | 3802.7      |
| L116      | V161       | I215      | 4709.4      |
| L116      | I169       | V41       | 3887.5      |
| L116      | I169       | L141      | 4516.5      |
| L116      | L170       | V26       | 3607.0      |
| L116      | L170       | M81       | 3612.9      |
| L116      | L170       | L89       | 4326.3      |
| L116      | L170       | M109      | 3790.9      |
| L116      | L170       | M112      | 3502.2      |
| L116      | L170       | L141      | 3669.3      |
| L116      | I215       | V161      | 4157.3      |
| L116      | V343       | L78       | 3607.2      |
| L116      | V343       | L89       | 2949.9      |
| L116      | V343       | M109      | 3235.9      |
| L119      | V26        | M112      | 2660.6      |
| L119      | V26        | L170      | 2512.2      |
| L119      | V33        | V53       | 3296.9      |

| First Res | Second Res | Third Res | Scaled Flow |
|-----------|------------|-----------|-------------|
| L119      | V41        | I169      | 2996.8      |
| L119      | V53        | V33       | 3049.0      |
| L119      | V53        | L116      | 3619.9      |
| L119      | V53        | V161      | 4457.1      |
| L119      | V53        | L170      | 2690.0      |
| L119      | L58        | I87       | 3855.9      |
| L119      | L58        | L89       | 3599.2      |
| L119      | I87        | L58       | 2992.5      |
| L119      | I87        | L89       | 2974.0      |
| L119      | L89        | L58       | 3313.0      |
| L119      | L89        | I87       | 3527.3      |
| L119      | L89        | L141      | 3720.4      |
| L119      | L89        | L170      | 3665.4      |
| L119      | M112       | V26       | 3505.5      |
| L119      | M112       | L170      | 2991.9      |
| L119      | L116       | V53       | 2930.6      |
| L119      | L116       | V161      | 2519.7      |
| L119      | L119       | V16       | 40.6        |
| L119      | L119       | V23       | 26.7        |
| L119      | L119       | V26       | 30.3        |
| L119      | L119       | L30       | 521.2       |
| L119      | L119       | V33       | 100.7       |
| L119      | L119       | V41       | 79.9        |
| L119      | L119       | V45       | 273.9       |
| L119      | L119       | V53       | 72.4        |
| L119      | L119       | L58       | 203.4       |
| L119      | L119       | I87       | 74.0        |
| L119      | L119       | L89       | 149.2       |
| L119      | L119       | M112      | 105.9       |
| L119      | L119       | L116      | 26.7        |
| L119      | L119       | M137      | 22.7        |
| L119      | L119       | L141      | 102.6       |
| L119      | L119       | V161      | 143.3       |
| L119      | L119       | I169      | 152.3       |
| L119      | L119       | L170      | 249.1       |
| L119      | L119       | L283      | 65.4        |
| L119      | M137       | L141      | 2639.3      |
| L119      | M137       | I169      | 2299.0      |
| L119      | L141       | L89       | 3387.1      |
| L119      | L141       | M137      | 3655.4      |
| L119      | L141       | I169      | 3778.3      |

| First Res | Second Res | Third Res | Scaled Flow |
|-----------|------------|-----------|-------------|
| L119      | V161       | V53       | 5257.5      |
| L119      | V161       | L116      | 3671.3      |
| L119      | I169       | V41       | 3510.0      |
| L119      | I169       | M137      | 3515.9      |
| L119      | I169       | L141      | 4172.0      |
| L119      | L170       | V26       | 4151.2      |
| L119      | L170       | V53       | 3689.9      |
| L119      | L170       | L89       | 4217.7      |
| L119      | L170       | M112      | 3752.3      |
| M120      | M120       | V33       | 46.3        |
| M120      | M120       | L167      | 54.7        |
| M120      | M120       | M219      | 43.6        |
| M120      | M120       | I220      | 22.7        |
| M120      | L167       | M219      | 3131.5      |
| M120      | M219       | L167      | 2985.7      |
| L125      | L125       | I220      | 144.7       |
| L125      | L125       | L294      | 21.8        |
| I130      | I130       | L141      | 36.8        |
| I130      | I130       | I144      | 60.2        |
| I130      | I130       | L159      | 61.6        |
| I130      | I130       | L167      | 230.0       |
| I130      | I130       | I169      | 258.0       |
| I130      | I130       | M219      | 448.9       |
| I130      | I130       | L283      | 53.7        |
| I130      | I130       | L292      | 23.5        |
| I130      | L141       | I144      | 3304.9      |
| I130      | L141       | I169      | 3139.2      |
| I130      | I144       | L141      | 3672.8      |
| I130      | I169       | L141      | 5037.7      |
| V134      | V134       | V45       | 42.6        |
| V134      | V134       | L159      | 23.9        |
| M137      | V41        | I169      | 2411.4      |
| M137      | V53        | L116      | 3337.8      |
| M137      | V53        | V161      | 4981.2      |
| M137      | V53        | L170      | 3804.1      |
| M137      | V53        | I215      | 4045.7      |
| M137      | L89        | L141      | 2592.5      |
| M137      | L89        | L170      | 3564.2      |
| M137      | M112       | L170      | 3492.9      |
| M137      | L116       | V53       | 3678.7      |
| M137      | M137       | V41       | 25.3        |

| First Res | Second Res | Third Res | Scaled Flow |
|-----------|------------|-----------|-------------|
| M137      | M137       | V53       | 164.6       |
| M137      | M137       | L89       | 37.7        |
| M137      | M137       | M112      | 72.1        |
| M137      | M137       | L116      | 234.5       |
| M137      | M137       | L119      | 22.7        |
| M137      | M137       | L141      | 612.1       |
| M137      | M137       | I144      | 34.2        |
| M137      | M137       | L159      | 841.0       |
| M137      | M137       | V161      | 204.7       |
| M137      | M137       | L167      | 424.3       |
| M137      | M137       | I169      | 367.3       |
| M137      | M137       | L170      | 26.7        |
| M137      | M137       | I209      | 59.6        |
| M137      | M137       | V212      | 253.2       |
| M137      | M137       | I215      | 41.5        |
| M137      | M137       | M216      | 35.9        |
| M137      | M137       | M219      | 25.1        |
| M137      | M137       | L283      | 148.8       |
| M137      | L141       | L89       | 5498.0      |
| M137      | L141       | I144      | 5853.0      |
| M137      | L141       | I169      | 4551.2      |
| M137      | L141       | L170      | 4820.1      |
| M137      | I144       | L141      | 2705.2      |
| M137      | L159       | V161      | 4898.7      |
| M137      | V161       | V53       | 5284.1      |
| M137      | V161       | L159      | 3047.5      |
| M137      | V161       | I215      | 4967.9      |
| M137      | L167       | M219      | 4723.1      |
| M137      | I169       | V41       | 4646.9      |
| M137      | I169       | L141      | 3817.0      |
| M137      | L170       | V53       | 2516.4      |
| M137      | L170       | L89       | 3322.9      |
| M137      | L170       | M112      | 2828.0      |
| M137      | L170       | L141      | 2119.0      |
| M137      | I215       | V53       | 2928.8      |
| M137      | I215       | V161      | 3390.2      |
| M137      | M219       | L167      | 2335.7      |
| M137      | M219       | L283      | 2354.1      |
| M137      | L283       | M219      | 3504.8      |
| L141      | L58        | I87       | 4139.2      |
| L141      | L77        | L78       | 5279.6      |

| First Res | Second Res | Third Res | Scaled Flow |
|-----------|------------|-----------|-------------|
| L141      | L77        | M81       | 5534.7      |
| L141      | L77        | I149      | 5653.2      |
| L141      | L77        | L174      | 6042.9      |
| L141      | L78        | L77       | 4333.1      |
| L141      | L78        | M81       | 3814.2      |
| L141      | L78        | L89       | 4369.0      |
| L141      | L78        | M109      | 3790.9      |
| L141      | L78        | I149      | 4570.0      |
| L141      | L78        | V343      | 5839.5      |
| L141      | M81        | L77       | 4792.4      |
| L141      | M81        | L78       | 4024.1      |
| L141      | I87        | L58       | 2742.1      |
| L141      | I87        | L89       | 2228.3      |
| L141      | I87        | M109      | 2482.3      |
| L141      | I87        | V323      | 2995.2      |
| L141      | I87        | V343      | 2707.2      |
| L141      | L89        | L78       | 6011.4      |
| L141      | L89        | I87       | 5666.7      |
| L141      | L89        | M109      | 5599.7      |
| L141      | L89        | L170      | 4492.3      |
| L141      | L89        | V343      | 5628.9      |
| L141      | M109       | L78       | 3079.4      |
| L141      | M109       | I87       | 3726.8      |
| L141      | M109       | L89       | 3306.0      |
| L141      | M109       | V343      | 4318.7      |
| L141      | M112       | L170      | 2577.9      |
| L141      | L116       | L159      | 2816.7      |
| L141      | M137       | L159      | 5416.1      |
| L141      | L141       | V41       | 171.4       |
| L141      | L141       | L58       | 200.8       |
| L141      | L141       | L77       | 689.1       |
| L141      | L141       | L78       | 394.9       |
| L141      | L141       | M81       | 463.7       |
| L141      | L141       | I87       | 35.0        |
| L141      | L141       | L89       | 927.3       |
| L141      | L141       | L90       | 45.6        |
| L141      | L141       | M109      | 196.9       |
| L141      | L141       | M112      | 52.5        |
| L141      | L141       | L116      | 31.8        |
| L141      | L141       | L119      | 102.6       |
| L141      | L141       | I130      | 36.8        |

| First Res | Second Res | Third Res | Scaled Flow |
|-----------|------------|-----------|-------------|
| L141      | L141       | M137      | 612.1       |
| L141      | L141       | I144      | 1159.7      |
| L141      | L141       | I149      | 164.6       |
| L141      | L141       | L159      | 35.0        |
| L141      | L141       | L167      | 70.5        |
| L141      | L141       | I169      | 1532.2      |
| L141      | L141       | L170      | 455.5       |
| L141      | L141       | L174      | 51.3        |
| L141      | L141       | V212      | 22.3        |
| L141      | L141       | V323      | 118.6       |
| L141      | L141       | V343      | 33.4        |
| L141      | I144       | L174      | 5743.5      |
| L141      | I149       | L77       | 3591.5      |
| L141      | I149       | L78       | 3537.5      |
| L141      | I149       | V323      | 3567.1      |
| L141      | L159       | L116      | 2873.7      |
| L141      | L159       | M137      | 2515.8      |
| L141      | L170       | L89       | 3424.0      |
| L141      | L170       | M112      | 4588.1      |
| L141      | L174       | L77       | 2907.7      |
| L141      | L174       | I144      | 2211.4      |
| L141      | L174       | V323      | 2680.7      |
| L141      | V323       | I87       | 3939.7      |
| L141      | V323       | I149      | 3279.5      |
| L141      | V323       | L174      | 3253.9      |
| L141      | V343       | L78       | 3127.9      |
| L141      | V343       | I87       | 2680.3      |
| L141      | V343       | L89       | 2191.4      |
| L141      | V343       | M109      | 2847.9      |
| I144      | L77        | L78       | 5323.9      |
| I144      | L77        | M81       | 5229.4      |
| I144      | L77        | I149      | 4514.2      |
| I144      | L77        | L174      | 3458.5      |
| I144      | L78        | L77       | 3519.5      |
| I144      | L78        | M81       | 3283.6      |
| I144      | L78        | L89       | 4088.0      |
| I144      | L78        | I149      | 3228.2      |
| I144      | M81        | L77       | 4211.3      |
| I144      | M81        | L78       | 4000.1      |
| I144      | L89        | L78       | 3986.8      |
| I144      | L89        | L141      | 2386.1      |

| First Res | Second Res | Third Res | Scaled Flow |
|-----------|------------|-----------|-------------|
| I144      | M137       | L141      | 2137.8      |
| I144      | L141       | L89       | 6715.1      |
| I144      | L141       | M137      | 6046.6      |
| I144      | L141       | I169      | 5574.9      |
| I144      | I144       | L77       | 221.3       |
| I144      | I144       | L78       | 39.5        |
| I144      | I144       | M81       | 95.9        |
| I144      | I144       | L89       | 35.0        |
| I144      | I144       | L90       | 123.6       |
| I144      | I144       | I130      | 60.2        |
| I144      | I144       | M137      | 34.2        |
| I144      | I144       | L141      | 1159.7      |
| I144      | I144       | I149      | 148.8       |
| I144      | I144       | I169      | 273.1       |
| I144      | I144       | L174      | 633.3       |
| I144      | I144       | V187      | 31.0        |
| I144      | I144       | M201      | 25.3        |
| I144      | I144       | V323      | 47.8        |
| I144      | I144       | V333      | 27.4        |
| I144      | I149       | L77       | 4055.0      |
| I144      | I149       | L78       | 4386.5      |
| I144      | I149       | V323      | 3844.0      |
| I144      | I169       | L141      | 3265.1      |
| I144      | L174       | L77       | 4861.7      |
| I144      | L174       | M201      | 4742.3      |
| I144      | M201       | L174      | 2037.8      |
| I144      | V323       | I149      | 2944.8      |
| I149      | V26        | L78       | 2172.1      |
| I149      | L58        | L75       | 2580.2      |
| I149      | L58        | L78       | 1828.1      |
| I149      | L58        | I87       | 3095.5      |
| I149      | L58        | L89       | 2778.4      |
| I149      | L58        | V323      | 1982.9      |
| I149      | L75        | L58       | 3045.0      |
| I149      | L77        | L78       | 4905.2      |
| I149      | L77        | M81       | 7439.9      |
| I149      | L77        | L174      | 5950.5      |
| I149      | L78        | V26       | 7224.1      |
| I149      | L78        | L58       | 5870.2      |
| I149      | L78        | L77       | 4038.8      |
| I149      | L78        | L89       | 8029.0      |

| First Res | Second Res | Third Res | Scaled Flow |
|-----------|------------|-----------|-------------|
| I149      | L78        | V343      | 7778.5      |
| I149      | M81        | L77       | 3954.4      |
| I149      | I87        | L58       | 2973.8      |
| I149      | I87        | L89       | 2594.8      |
| I149      | I87        | V323      | 2402.3      |
| I149      | I87        | V343      | 2411.9      |
| I149      | L89        | L58       | 3963.5      |
| I149      | L89        | L78       | 3566.9      |
| I149      | L89        | I87       | 3853.1      |
| I149      | L89        | L141      | 3472.0      |
| I149      | L89        | V343      | 3436.0      |
| I149      | L141       | L89       | 3679.4      |
| I149      | L141       | I144      | 3825.3      |
| I149      | I144       | L141      | 3725.4      |
| I149      | I149       | V26       | 22.3        |
| I149      | I149       | L58       | 26.7        |
| I149      | I149       | L75       | 58.9        |
| I149      | I149       | L77       | 1918.7      |
| I149      | I149       | L78       | 1355.4      |
| I149      | I149       | M81       | 471.9       |
| I149      | I149       | V86       | 50.2        |
| I149      | I149       | I87       | 21.7        |
| I149      | I149       | L89       | 131.6       |
| I149      | I149       | L141      | 164.6       |
| I149      | I149       | I144      | 148.8       |
| I149      | I149       | L174      | 347.8       |
| I149      | I149       | M182      | 69.0        |
| I149      | I149       | V323      | 774.5       |
| I149      | I149       | V343      | 70.5        |
| I149      | L174       | L77       | 2860.8      |
| I149      | V323       | L58       | 4941.5      |
| I149      | V323       | I87       | 6231.6      |
| I149      | V343       | L78       | 2976.7      |
| I149      | V343       | I87       | 3085.2      |
| I149      | V343       | L89       | 2959.9      |
| I150      | I150       | L198      | 53.7        |
| I150      | I150       | M201      | 230.0       |
| I150      | I150       | I220      | 44.5        |
| I150      | I150       | M239      | 58.9        |
| I150      | I150       | V241      | 56.2        |
| I150      | I150       | L253      | 31.8        |

| First Res | Second Res | Third Res | Scaled Flow |
|-----------|------------|-----------|-------------|
| I150      | I150       | V293      | 78.8        |
| I150      | I150       | L337      | 106.7       |
| I150      | I150       | V361      | 31.1        |
| I150      | L198       | M239      | 3496.3      |
| I150      | L198       | L253      | 3448.3      |
| I150      | M201       | L253      | 5222.9      |
| I150      | M239       | L198      | 3567.5      |
| I150      | M239       | V241      | 3380.9      |
| I150      | M239       | L253      | 2949.9      |
| I150      | V241       | M239      | 3346.9      |
| I150      | L253       | L198      | 3088.0      |
| I150      | L253       | M201      | 3264.6      |
| I150      | L253       | M239      | 2588.9      |
| I150      | V293       | V361      | 3194.2      |
| I150      | V361       | V293      | 2615.0      |
| L154      | V53        | L116      | 3972.7      |
| L154      | V53        | V161      | 5134.4      |
| L154      | V53        | L170      | 3733.1      |
| L154      | V53        | I215      | 4068.6      |
| L154      | L116       | V53       | 2963.0      |
| L154      | L116       | V161      | 2690.5      |
| L154      | L116       | I215      | 2788.8      |
| L154      | L154       | V53       | 168.0       |
| L154      | L154       | L116      | 48.9        |
| L154      | L154       | L159      | 542.7       |
| L154      | L154       | V161      | 148.8       |
| L154      | L154       | L167      | 28.0        |
| L154      | L154       | L170      | 34.2        |
| L154      | L154       | I215      | 40.5        |
| L154      | L154       | M219      | 97.2        |
| L154      | L159       | V161      | 4684.4      |
| L154      | V161       | V53       | 4973.7      |
| L154      | V161       | L116      | 3494.5      |
| L154      | V161       | L159      | 3167.9      |
| L154      | V161       | I215      | 4678.9      |
| L154      | L167       | M219      | 2696.7      |
| L154      | L170       | V53       | 2582.5      |
| L154      | I215       | V53       | 2915.1      |
| L154      | I215       | L116      | 2679.0      |
| L154      | I215       | V161      | 3460.6      |
| L154      | M219       | L167      | 3538.0      |

| First Res | Second Res | Third Res | Scaled Flow |
|-----------|------------|-----------|-------------|
| L159      | V53        | V161      | 4922.9      |
| L159      | V53        | L170      | 4219.3      |
| L159      | V53        | I215      | 4324.2      |
| L159      | M137       | L141      | 5459.2      |
| L159      | L141       | M137      | 2237.7      |
| L159      | L141       | I169      | 3047.8      |
| L159      | L141       | L170      | 2714.1      |
| L159      | L159       | V53       | 480.3       |
| L159      | L159       | L116      | 463.7       |
| L159      | L159       | I130      | 61.6        |
| L159      | L159       | V134      | 23.9        |
| L159      | L159       | M137      | 841.0       |
| L159      | L159       | L141      | 35.0        |
| L159      | L159       | L154      | 542.7       |
| L159      | L159       | V161      | 1106.0      |
| L159      | L159       | L167      | 323.1       |
| L159      | L159       | I169      | 341.4       |
| L159      | L159       | L170      | 66.0        |
| L159      | L159       | I215      | 134.3       |
| L159      | L159       | M219      | 244.4       |
| L159      | L159       | L283      | 109.0       |
| L159      | V161       | V53       | 6864.8      |
| L159      | V161       | I215      | 6618.8      |
| L159      | I169       | L141      | 5377.2      |
| L159      | L170       | V53       | 2448.7      |
| L159      | L170       | L141      | 3108.8      |
| L159      | I215       | V53       | 2973.4      |
| L159      | I215       | V161      | 3263.7      |
| V161      | V33        | V53       | 1680.7      |
| V161      | V41        | I169      | 2929.0      |
| V161      | V53        | V33       | 11765.3     |
| V161      | M112       | L170      | 3153.8      |
| V161      | M137       | L167      | 3681.7      |
| V161      | V161       | V33       | 46.8        |
| V161      | V161       | V41       | 89.9        |
| V161      | V161       | V53       | 4391.7      |
| V161      | V161       | M112      | 185.6       |
| V161      | V161       | L116      | 506.2       |
| V161      | V161       | L119      | 143.3       |
| V161      | V161       | M137      | 204.7       |
| V161      | V161       | L154      | 148.8       |



| First Res | Second Res | Third Res | Scaled Flow |
|-----------|------------|-----------|-------------|
| V161      | V161       | L159      | 1106.0      |
| V161      | V161       | L167      | 33.4        |
| V161      | V161       | I169      | 212.9       |
| V161      | V161       | L170      | 278.3       |
| V161      | V161       | I215      | 1890.5      |
| V161      | V161       | M219      | 62.5        |
| V161      | V161       | L283      | 26.0        |
| V161      | L167       | M137      | 2401.7      |
| V161      | L167       | M219      | 2850.0      |
| V161      | L167       | L283      | 2785.9      |
| V161      | I169       | V41       | 3653.4      |
| V161      | L170       | M112      | 3538.5      |
| V161      | M219       | L167      | 3260.5      |
| V161      | M219       | L283      | 3052.9      |
| V161      | L283       | L167      | 2649.8      |
| V161      | L283       | M219      | 2538.2      |
| L167      | M137       | L141      | 4225.9      |
| L167      | L141       | M137      | 2596.9      |
| L167      | L141       | I169      | 4062.9      |
| L167      | L154       | L159      | 2382.6      |
| L167      | L159       | L154      | 4322.4      |
| L167      | L159       | V161      | 4975.9      |
| L167      | V161       | L159      | 2840.6      |
| L167      | V161       | I215      | 3670.2      |
| L167      | L167       | M120      | 54.7        |
| L167      | L167       | I130      | 230.0       |
| L167      | L167       | M137      | 424.3       |
| L167      | L167       | L141      | 70.5        |
| L167      | L167       | L154      | 28.0        |
| L167      | L167       | L159      | 323.1       |
| L167      | L167       | V161      | 33.4        |
| L167      | L167       | I169      | 25.3        |
| L167      | L167       | I215      | 36.8        |
| L167      | L167       | M219      | 588.2       |
| L167      | L167       | L283      | 380.9       |
| L167      | I169       | L141      | 3273.3      |
| L167      | I215       | V161      | 3744.5      |
| I169      | V33        | V53       | 2704.1      |
| I169      | V53        | V33       | 3745.6      |
| I169      | V53        | L116      | 3524.2      |
| I169      | V53        | V161      | 4911.6      |

| First Res | Second Res | Third Res | Scaled Flow |
|-----------|------------|-----------|-------------|
| I169      | V53        | I215      | 3748.5      |
| I169      | L58        | L89       | 3554.4      |
| I169      | L77        | M81       | 3938.3      |
| I169      | L77        | L141      | 2131.2      |
| I169      | M81        | L77       | 4557.9      |
| I169      | M81        | M109      | 3114.3      |
| I169      | L89        | L58       | 3351.6      |
| I169      | L89        | M109      | 4387.7      |
| I169      | L89        | L141      | 2505.9      |
| I169      | L89        | L170      | 3645.7      |
| I169      | M109       | M81       | 2990.6      |
| I169      | M109       | L89       | 3515.5      |
| I169      | M109       | L170      | 2770.8      |
| I169      | L116       | V53       | 3432.5      |
| I169      | M137       | L159      | 3531.0      |
| I169      | M137       | L167      | 4239.9      |
| I169      | L141       | L77       | 6805.4      |
| I169      | L141       | L89       | 5768.8      |
| I169      | L141       | I144      | 5484.8      |
| I169      | I144       | L141      | 2788.9      |
| I169      | L159       | M137      | 3450.2      |
| I169      | L159       | V161      | 4073.0      |
| I169      | V161       | V53       | 5351.7      |
| I169      | V161       | L159      | 3542.0      |
| I169      | V161       | I215      | 4718.9      |
| I169      | L167       | M137      | 2200.2      |
| I169      | L167       | L283      | 2271.3      |
| I169      | I169       | V33       | 37.8        |
| I169      | I169       | V41       | 633.3       |
| I169      | I169       | V53       | 155.0       |
| I169      | I169       | L58       | 193.0       |
| I169      | I169       | L77       | 37.7        |
| I169      | I169       | M81       | 73.8        |
| I169      | I169       | L89       | 155.0       |
| I169      | I169       | M109      | 61.6        |
| I169      | I169       | L116      | 139.9       |
| I169      | I169       | L119      | 152.3       |
| I169      | I169       | I130      | 258.0       |
| I169      | I169       | M137      | 367.3       |
| I169      | I169       | L141      | 1532.2      |
| I169      | I169       | I144      | 273.1       |

| First Res | Second Res | Third Res | Scaled Flow |
|-----------|------------|-----------|-------------|
| I169      | I169       | L159      | 341.4       |
| I169      | I169       | V161      | 212.9       |
| I169      | I169       | L167      | 25.3        |
| I169      | I169       | L170      | 273.1       |
| I169      | I169       | V212      | 95.9        |
| I169      | I169       | I215      | 84.2        |
| I169      | I169       | I220      | 24.1        |
| I169      | I169       | L283      | 212.9       |
| I169      | L170       | L89       | 4267.5      |
| I169      | L170       | M109      | 4048.0      |
| I169      | I215       | V53       | 3224.7      |
| I169      | I215       | V161      | 3725.6      |
| I169      | L283       | L167      | 3719.2      |
| L170      | V41        | L58       | 2639.5      |
| L170      | V41        | I169      | 2586.6      |
| L170      | V53        | L116      | 4180.8      |
| L170      | V53        | V161      | 6128.7      |
| L170      | V53        | I215      | 5334.0      |
| L170      | L58        | V41       | 2831.7      |
| L170      | L58        | L75       | 3000.2      |
| L170      | L58        | L89       | 2308.9      |
| L170      | L75        | L58       | 2594.1      |
| L170      | L77        | L78       | 3431.5      |
| L170      | L77        | M81       | 3706.7      |
| L170      | L77        | L141      | 2577.9      |
| L170      | L78        | L77       | 6181.3      |
| L170      | L78        | M81       | 4101.3      |
| L170      | L78        | L89       | 4205.7      |
| L170      | L78        | V343      | 6327.0      |
| L170      | M81        | L77       | 6109.8      |
| L170      | M81        | L78       | 3752.8      |
| L170      | L89        | L58       | 6342.7      |
| L170      | L89        | L78       | 6413.7      |
| L170      | L89        | M109      | 4645.7      |
| L170      | L89        | V343      | 6692.6      |
| L170      | M109       | L89       | 3474.3      |
| L170      | M109       | V343      | 5971.2      |
| L170      | L116       | V53       | 2984.3      |
| L170      | L116       | L159      | 3415.1      |
| L170      | M137       | L141      | 2351.8      |
| L170      | M137       | L159      | 2957.0      |

| First Res | Second Res | Third Res | Scaled Flow |
|-----------|------------|-----------|-------------|
| L170      | L141       | L77       | 4588.1      |
| L170      | L141       | M137      | 4816.6      |
| L170      | L141       | I169      | 4517.8      |
| L170      | L154       | L159      | 2803.2      |
| L170      | L159       | L116      | 2676.5      |
| L170      | L159       | M137      | 3578.9      |
| L170      | L159       | L154      | 3227.1      |
| L170      | L159       | V161      | 3122.5      |
| L170      | V161       | V53       | 4961.2      |
| L170      | V161       | L159      | 4518.4      |
| L170      | V161       | I215      | 5429.6      |
| L170      | I169       | V41       | 4199.7      |
| L170      | I169       | L141      | 3841.9      |
| L170      | L170       | V26       | 591.5       |
| L170      | L170       | V33       | 109.3       |
| L170      | L170       | V41       | 37.7        |
| L170      | L170       | V53       | 533.4       |
| L170      | L170       | L58       | 52.5        |
| L170      | L170       | L75       | 26.0        |
| L170      | L170       | L77       | 52.5        |
| L170      | L170       | L78       | 471.9       |
| L170      | L170       | M81       | 360.7       |
| L170      | L170       | L89       | 1314.1      |
| L170      | L170       | M109      | 677.6       |
| L170      | L170       | M112      | 689.1       |
| L170      | L170       | L116      | 178.3       |
| L170      | L170       | L119      | 249.1       |
| L170      | L170       | M137      | 26.7        |
| L170      | L170       | L141      | 455.5       |
| L170      | L170       | L154      | 34.2        |
| L170      | L170       | L159      | 66.0        |
| L170      | L170       | V161      | 278.3       |
| L170      | L170       | I169      | 273.1       |
| L170      | L170       | I215      | 30.2        |
| L170      | L170       | V343      | 21.7        |
| L170      | I215       | V53       | 2527.9      |
| L170      | I215       | V161      | 3178.8      |
| L170      | V343       | L78       | 2932.3      |
| L170      | V343       | L89       | 2033.9      |
| L170      | V343       | M109      | 2426.5      |
| L174      | L58        | L78       | 2836.8      |

| First Res | Second Res | Third Res | Scaled Flow |
|-----------|------------|-----------|-------------|
| L174      | L58        | I87       | 3529.6      |
| L174      | L77        | L78       | 8408.4      |
| L174      | L77        | M81       | 7320.3      |
| L174      | L77        | L141      | 6264.7      |
| L174      | L77        | I149      | 6031.1      |
| L174      | L78        | L58       | 2880.2      |
| L174      | L78        | L77       | 3151.1      |
| L174      | L78        | M81       | 3224.4      |
| L174      | L78        | L141      | 2941.1      |
| L174      | L78        | I149      | 3214.2      |
| L174      | M81        | L77       | 3951.8      |
| L174      | M81        | L78       | 4644.9      |
| L174      | M81        | L141      | 3800.7      |
| L174      | I87        | L58       | 2830.0      |
| L174      | I87        | V323      | 2545.6      |
| L174      | L141       | L77       | 2198.6      |
| L174      | L141       | L78       | 2754.3      |
| L174      | L141       | M81       | 2470.8      |
| L174      | L141       | I144      | 2807.7      |
| L174      | I144       | L141      | 5649.7      |
| L174      | I149       | L77       | 3466.1      |
| L174      | I149       | L78       | 4929.1      |
| L174      | L174       | L58       | 64.5        |
| L174      | L174       | L77       | 1397.8      |
| L174      | L174       | L78       | 69.0        |
| L174      | L174       | M81       | 283.6       |
| L174      | L174       | V86       | 34.3        |
| L174      | L174       | I87       | 22.3        |
| L174      | L174       | L90       | 161.3       |
| L174      | L174       | L141      | 51.3        |
| L174      | L174       | I144      | 633.3       |
| L174      | L174       | I149      | 347.8       |
| L174      | L174       | M182      | 66.0        |
| L174      | L174       | V186      | 335.2       |
| L174      | L174       | V187      | 123.6       |
| L174      | L174       | M201      | 402.1       |
| L174      | L174       | V323      | 439.7       |
| L174      | L174       | V333      | 42.6        |
| L174      | L174       | L357      | 22.7        |
| L174      | M182       | V187      | 3401.9      |
| L174      | V186       | V187      | 4123.3      |

| First Res | Second Res | Third Res | Scaled Flow |
|-----------|------------|-----------|-------------|
| L174      | V187       | M182      | 3947.3      |
| L174      | V187       | V186      | 3124.1      |
| L174      | V323       | I87       | 5335.3      |
| M182      | L77        | L78       | 4496.0      |
| M182      | L77        | M81       | 5165.4      |
| M182      | L77        | I149      | 4675.8      |
| M182      | L77        | L174      | 4390.8      |
| M182      | L78        | L77       | 4520.2      |
| M182      | L78        | M81       | 4287.7      |
| M182      | L78        | L89       | 5215.5      |
| M182      | L78        | I149      | 4360.1      |
| M182      | M81        | L77       | 4067.6      |
| M182      | M81        | L78       | 3358.4      |
| M182      | M81        | I149      | 2975.4      |
| M182      | L89        | L78       | 3883.8      |
| M182      | I149       | L77       | 3682.0      |
| M182      | I149       | L78       | 3415.1      |
| M182      | I149       | M81       | 2975.4      |
| M182      | L174       | L77       | 3422.7      |
| M182      | M182       | L66       | 300.0       |
| M182      | M182       | L77       | 181.9       |
| M182      | M182       | L78       | 185.6       |
| M182      | M182       | M81       | 69.0        |
| M182      | M182       | L89       | 55.0        |
| M182      | M182       | L90       | 51.3        |
| M182      | M182       | I149      | 69.0        |
| M182      | M182       | L174      | 66.0        |
| M182      | M182       | V186      | 145.8       |
| M182      | M182       | V187      | 1159.7      |
| M182      | M182       | V333      | 27.1        |
| M182      | V186       | V187      | 2602.1      |
| M182      | V187       | V186      | 5283.7      |
| V186      | L77        | L174      | 3221.9      |
| V186      | L90        | L367      | 2750.8      |
| V186      | L174       | L77       | 4959.3      |
| V186      | M182       | V187      | 2969.2      |
| V186      | V186       | L66       | 28.0        |
| V186      | V186       | L77       | 64.5        |
| V186      | V186       | V86       | 63.2        |
| V186      | V186       | L90       | 51.3        |
| V186      | V186       | L174      | 335.2       |

| First Res | Second Res | Third Res | Scaled Flow |
|-----------|------------|-----------|-------------|
| V186      | V186       | M182      | 145.8       |
| V186      | V186       | V187      | 883.2       |
| V186      | V186       | V300      | 32.5        |
| V186      | V186       | V333      | 38.7        |
| V186      | V186       | L357      | 261.3       |
| V186      | V186       | L367      | 56.6        |
| V186      | V187       | M182      | 5335.3      |
| V186      | L367       | L90       | 2832.5      |
| V187      | L77        | L174      | 3700.4      |
| V187      | I144       | L174      | 2719.4      |
| V187      | L174       | L77       | 3998.3      |
| V187      | L174       | I144      | 3706.0      |
| V187      | V187       | L66       | 80.6        |
| V187      | V187       | L77       | 89.9        |
| V187      | V187       | L90       | 33.4        |
| V187      | V187       | I144      | 31.0        |
| V187      | V187       | L174      | 123.6       |
| V187      | V187       | M182      | 1159.7      |
| V187      | V187       | V186      | 883.2       |
| V187      | V187       | V300      | 40.5        |
| V187      | V187       | V333      | 62.5        |
| I197      | I197       | L198      | 1627.9      |
| I197      | I197       | L225      | 100.1       |
| I197      | I197       | I238      | 263.8       |
| I197      | I197       | M239      | 82.4        |
| I197      | I197       | L253      | 126.2       |
| I197      | I197       | L265      | 42.2        |
| I197      | I197       | L268      | 225.6       |
| I197      | I197       | I276      | 72.1        |
| I197      | I197       | L288      | 80.6        |
| I197      | I197       | L292      | 121.1       |
| I197      | I197       | V293      | 200.8       |
| I197      | I197       | L294      | 278.3       |
| I197      | L198       | M239      | 7132.3      |
| I197      | L198       | L253      | 6017.3      |
| I197      | L225       | I238      | 2946.1      |
| I197      | L225       | I276      | 3539.0      |
| I197      | L225       | L294      | 3859.1      |
| I197      | I238       | L225      | 3811.2      |
| I197      | I238       | I276      | 5747.8      |
| I197      | I238       | L292      | 4231.9      |

| First Res | Second Res | Third Res | Scaled Flow |
|-----------|------------|-----------|-------------|
| I197      | M239       | L198      | 2564.4      |
| I197      | M239       | L294      | 2890.8      |
| I197      | L253       | L198      | 2398.5      |
| I197      | L253       | L268      | 3225.6      |
| I197      | L268       | L253      | 3765.3      |
| I197      | I276       | L225      | 3277.8      |
| I197      | I276       | I238      | 4115.2      |
| I197      | I276       | L294      | 3145.7      |
| I197      | L292       | I238      | 3427.2      |
| I197      | L294       | L225      | 5068.4      |
| I197      | L294       | M239      | 3975.9      |
| I197      | L294       | I276      | 4460.6      |
| L198      | L198       | I150      | 53.7        |
| L198      | L198       | I197      | 1627.9      |
| L198      | L198       | M201      | 174.8       |
| L198      | L198       | L225      | 123.6       |
| L198      | L198       | I238      | 279.2       |
| L198      | L198       | M239      | 1159.7      |
| L198      | L198       | L253      | 869.0       |
| L198      | L198       | M262      | 91.8        |
| L198      | L198       | L265      | 67.9        |
| L198      | L198       | L268      | 185.6       |
| L198      | L198       | I276      | 134.3       |
| L198      | L198       | L292      | 118.6       |
| L198      | L198       | L294      | 581.5       |
| L198      | M201       | L253      | 3512.7      |
| L198      | M201       | L268      | 3183.0      |
| L198      | L225       | I238      | 2997.4      |
| L198      | L225       | I276      | 3438.5      |
| L198      | L225       | L294      | 3672.5      |
| L198      | I238       | L225      | 3744.2      |
| L198      | I238       | I276      | 5517.0      |
| L198      | I238       | L292      | 4285.7      |
| L198      | L253       | M201      | 5976.4      |
| L198      | M262       | L294      | 2541.5      |
| L198      | L268       | M201      | 3234.6      |
| L198      | I276       | L225      | 3511.1      |
| L198      | I276       | I238      | 4509.8      |
| L198      | I276       | L294      | 3087.6      |
| L198      | L292       | I238      | 3395.4      |
| L198      | L294       | L225      | 5836.9      |

| First Res | Second Res | Third Res | Scaled Flow |
|-----------|------------|-----------|-------------|
| L198      | L294       | M262      | 4342.2      |
| L198      | L294       | I276      | 4805.7      |
| M201      | I144       | L174      | 2389.7      |
| M201      | L174       | I144      | 4741.8      |
| M201      | L198       | M239      | 3878.9      |
| M201      | L198       | L253      | 2325.0      |
| M201      | M201       | I144      | 25.3        |
| M201      | M201       | I150      | 230.0       |
| M201      | M201       | L174      | 402.1       |
| M201      | M201       | L198      | 174.8       |
| M201      | M201       | M239      | 142.8       |
| M201      | M201       | L253      | 1947.2      |
| M201      | M201       | M262      | 80.6        |
| M201      | M201       | L265      | 42.7        |
| M201      | M201       | L268      | 591.5       |
| M201      | M239       | L198      | 3678.7      |
| M201      | L253       | L198      | 5957.0      |
| I209      | I209       | M137      | 59.6        |
| I209      | I209       | M216      | 199.3       |
| I209      | I209       | L288      | 43.0        |
| I209      | I209       | V293      | 55.6        |
| I209      | L288       | V293      | 2701.8      |
| I209      | V293       | L288      | 2855.7      |
| V212      | M137       | L141      | 4316.7      |
| V212      | L141       | M137      | 2447.0      |
| V212      | L141       | I169      | 3157.9      |
| V212      | I169       | L141      | 4316.8      |
| V212      | V212       | M137      | 253.2       |
| V212      | V212       | L141      | 22.3        |
| V212      | V212       | I169      | 95.9        |
| V212      | V212       | L283      | 21.7        |
| V212      | V212       | M291      | 56.2        |
| I215      | V53        | V161      | 4885.5      |
| I215      | V53        | L170      | 5398.4      |
| I215      | M112       | L170      | 3286.4      |
| I215      | M137       | L159      | 2969.7      |
| I215      | M137       | L167      | 2860.3      |
| I215      | M137       | I169      | 2595.0      |
| I215      | L154       | L159      | 2698.2      |
| I215      | L159       | M137      | 3891.4      |
| I215      | L159       | L154      | 3553.3      |

| First Res | Second Res | Third Res | Scaled Flow |
|-----------|------------|-----------|-------------|
| I215      | L159       | V161      | 2526.5      |
| I215      | V161       | V53       | 7274.7      |
| I215      | V161       | L159      | 6809.2      |
| I215      | L167       | M137      | 2789.5      |
| I215      | L167       | M219      | 2776.1      |
| I215      | I169       | M137      | 3035.0      |
| I215      | L170       | V53       | 2132.7      |
| I215      | L170       | M112      | 2943.1      |
| I215      | I215       | V53       | 854.9       |
| I215      | I215       | M112      | 51.3        |
| I215      | I215       | L116      | 347.8       |
| I215      | I215       | M137      | 41.5        |
| I215      | I215       | L154      | 40.5        |
| I215      | I215       | L159      | 134.3       |
| I215      | I215       | V161      | 1890.5      |
| I215      | I215       | L167      | 36.8        |
| I215      | I215       | I169      | 84.2        |
| I215      | I215       | L170      | 30.2        |
| I215      | I215       | M219      | 102.6       |
| I215      | M219       | L167      | 3491.7      |
| M216      | M216       | M137      | 35.9        |
| M216      | M216       | I209      | 199.3       |
| M216      | M216       | M291      | 21.2        |
| M219      | L116       | L159      | 2407.4      |
| M219      | L116       | V161      | 2767.9      |
| M219      | L116       | I215      | 2456.8      |
| M219      | M137       | L159      | 2659.7      |
| M219      | M137       | L167      | 2082.6      |
| M219      | L154       | L159      | 2796.7      |
| M219      | L159       | L116      | 3877.6      |
| M219      | L159       | M137      | 4538.1      |
| M219      | L159       | L154      | 3560.9      |
| M219      | L159       | V161      | 4430.1      |
| M219      | V161       | L116      | 3162.4      |
| M219      | V161       | L159      | 3142.3      |
| M219      | V161       | I215      | 3783.7      |
| M219      | L167       | M137      | 4724.4      |
| M219      | I215       | L116      | 3148.3      |
| M219      | I215       | V161      | 4243.9      |
| M219      | M219       | L116      | 33.5        |
| M219      | M219       | M120      | 43.6        |

| First Res | Second Res | Third Res | Scaled Flow |
|-----------|------------|-----------|-------------|
| M219      | M219       | I130      | 448.9       |
| M219      | M219       | M137      | 25.1        |
| M219      | M219       | L154      | 97.2        |
| M219      | M219       | L159      | 244.4       |
| M219      | M219       | V161      | 62.5        |
| M219      | M219       | L167      | 588.2       |
| M219      | M219       | I215      | 102.6       |
| M219      | M219       | L283      | 385.5       |
| I220      | I220       | V33       | 32.2        |
| I220      | I220       | M120      | 22.7        |
| I220      | I220       | L125      | 144.7       |
| I220      | I220       | I150      | 44.5        |
| I220      | I220       | I169      | 24.1        |
| I220      | I220       | L277      | 28.0        |
| I220      | I220       | L287      | 69.0        |
| I220      | I220       | L288      | 80.6        |
| I220      | I220       | V293      | 208.8       |
| I220      | I220       | V323      | 21.2        |
| I220      | L277       | L288      | 2711.5      |
| I220      | L288       | L277      | 3401.0      |
| L225      | I197       | L198      | 3884.6      |
| L225      | L198       | I197      | 4091.0      |
| L225      | L198       | M239      | 3270.3      |
| L225      | L225       | I197      | 100.1       |
| L225      | L225       | L198      | 123.6       |
| L225      | L225       | I238      | 685.4       |
| L225      | L225       | M239      | 402.1       |
| L225      | L225       | V241      | 601.7       |
| L225      | L225       | L265      | 48.1        |
| L225      | L225       | I276      | 841.0       |
| L225      | L225       | L277      | 927.3       |
| L225      | L225       | L288      | 139.9       |
| L225      | L225       | L292      | 95.9        |
| L225      | L225       | L294      | 2221.5      |
| L225      | I238       | I276      | 5247.7      |
| L225      | I238       | L292      | 5323.6      |
| L225      | M239       | L198      | 4574.6      |
| L225      | I276       | I238      | 5692.5      |
| L225      | L292       | I238      | 2956.8      |
| I238      | I197       | L198      | 4159.1      |
| I238      | L198       | I197      | 4229.4      |

| First Res | Second Res | Third Res | Scaled Flow |
|-----------|------------|-----------|-------------|
| I238      | L198       | M239      | 4168.0      |
| I238      | L198       | L253      | 3859.8      |
| I238      | L225       | L294      | 4862.7      |
| I238      | I238       | I197      | 263.8       |
| I238      | I238       | L198      | 279.2       |
| I238      | I238       | L225      | 685.4       |
| I238      | I238       | M239      | 150.8       |
| I238      | I238       | V241      | 219.8       |
| I238      | I238       | L253      | 155.4       |
| I238      | I238       | L265      | 259.1       |
| I238      | I238       | L268      | 51.4        |
| I238      | I238       | I276      | 3696.9      |
| I238      | I238       | L277      | 318.1       |
| I238      | I238       | L288      | 120.2       |
| I238      | I238       | L292      | 1154.0      |
| I238      | I238       | V293      | 55.8        |
| I238      | I238       | L294      | 539.6       |
| I238      | M239       | L198      | 3512.5      |
| I238      | M239       | V241      | 3394.7      |
| I238      | M239       | L294      | 2805.2      |
| I238      | V241       | M239      | 3759.1      |
| I238      | L253       | L198      | 3278.6      |
| I238      | L253       | L268      | 3888.4      |
| I238      | L268       | L253      | 2991.9      |
| I238      | L294       | L225      | 4449.0      |
| I238      | L294       | M239      | 4125.6      |
| M239      | I197       | L198      | 2966.9      |
| M239      | L198       | I197      | 6928.5      |
| M239      | M201       | L253      | 3828.2      |
| M239      | M201       | L268      | 3227.9      |
| M239      | L225       | I238      | 3866.5      |
| M239      | L225       | I276      | 3624.8      |
| M239      | L225       | L294      | 4211.9      |
| M239      | I238       | L225      | 2909.7      |
| M239      | I238       | I276      | 4544.3      |
| M239      | M239       | I150      | 58.9        |
| M239      | M239       | I197      | 82.4        |
| M239      | M239       | L198      | 1159.7      |
| M239      | M239       | M201      | 142.8       |
| M239      | M239       | L225      | 402.1       |
| M239      | M239       | I238      | 150.8       |

| First Res | Second Res | Third Res | Scaled Flow |
|-----------|------------|-----------|-------------|
| M239      | M239       | V241      | 897.7       |
| M239      | M239       | V250      | 24.1        |
| M239      | M239       | L253      | 367.3       |
| M239      | M239       | M262      | 63.0        |
| M239      | M239       | L265      | 71.0        |
| M239      | M239       | L268      | 134.3       |
| M239      | M239       | I276      | 317.2       |
| M239      | M239       | L294      | 712.6       |
| M239      | M239       | V300      | 23.5        |
| M239      | V250       | M262      | 2817.2      |
| M239      | L253       | M201      | 5013.5      |
| M239      | L253       | L268      | 4057.6      |
| M239      | M262       | V250      | 3443.7      |
| M239      | M262       | L294      | 2392.5      |
| M239      | L268       | M201      | 3177.5      |
| M239      | L268       | L253      | 3049.9      |
| M239      | I276       | L225      | 3362.0      |
| M239      | I276       | I238      | 5600.6      |
| M239      | I276       | L294      | 3270.1      |
| M239      | L294       | L225      | 5169.0      |
| M239      | L294       | M262      | 4814.1      |
| M239      | L294       | I276      | 4326.9      |
| V241      | L225       | L277      | 5783.6      |
| V241      | L225       | L294      | 5517.9      |
| V241      | I238       | I276      | 4929.5      |
| V241      | V241       | I150      | 56.2        |
| V241      | V241       | L225      | 601.7       |
| V241      | V241       | I238      | 219.8       |
| V241      | V241       | M239      | 897.7       |
| V241      | V241       | V250      | 217.1       |
| V241      | V241       | L253      | 60.2        |
| V241      | V241       | M262      | 73.8        |
| V241      | V241       | L265      | 59.2        |
| V241      | V241       | I276      | 268.0       |
| V241      | V241       | L277      | 22.3        |
| V241      | V241       | L294      | 204.7       |
| V241      | V250       | M262      | 3824.9      |
| V241      | M262       | V250      | 2913.0      |
| V241      | M262       | L294      | 2851.1      |
| V241      | I276       | I238      | 5215.1      |
| V241      | I276       | L294      | 3917.4      |

| First Res | Second Res | Third Res | Scaled Flow |
|-----------|------------|-----------|-------------|
| V241      | L277       | L225      | 2470.5      |
| V241      | L294       | L225      | 3914.7      |
| V241      | L294       | M262      | 3683.0      |
| V241      | L294       | I276      | 3627.3      |
| V250      | M239       | V241      | 2710.2      |
| V250      | M239       | L253      | 2541.2      |
| V250      | M239       | L294      | 2814.0      |
| V250      | V241       | M239      | 4507.1      |
| V250      | V250       | M239      | 24.1        |
| V250      | V250       | V241      | 217.1       |
| V250      | V250       | L253      | 47.8        |
| V250      | V250       | M262      | 689.1       |
| V250      | V250       | L265      | 132.4       |
| V250      | V250       | L268      | 181.9       |
| V250      | V250       | L294      | 70.5        |
| V250      | L253       | M239      | 2924.1      |
| V250      | L253       | L268      | 2922.5      |
| V250      | M262       | L294      | 4696.0      |
| V250      | L268       | L253      | 4023.3      |
| V250      | L294       | M239      | 3528.0      |
| V250      | L294       | M262      | 2425.1      |
| L253      | I197       | L198      | 3225.6      |
| L253      | L198       | I197      | 5971.3      |
| L253      | L198       | M239      | 4455.5      |
| L253      | I238       | I276      | 5420.9      |
| L253      | I238       | L292      | 3796.5      |
| L253      | M239       | L198      | 3252.6      |
| L253      | M239       | V241      | 4597.0      |
| L253      | M239       | L294      | 3728.7      |
| L253      | V241       | M239      | 2858.0      |
| L253      | V250       | M262      | 2710.6      |
| L253      | L253       | I150      | 31.8        |
| L253      | L253       | I197      | 126.2       |
| L253      | L253       | L198      | 869.0       |
| L253      | L253       | M201      | 1947.2      |
| L253      | L253       | I238      | 155.4       |
| L253      | L253       | M239      | 367.3       |
| L253      | L253       | V241      | 60.2        |
| L253      | L253       | V250      | 47.8        |
| L253      | L253       | M262      | 268.0       |
| L253      | L253       | L265      | 43.8        |

| First Res | Second Res | Third Res | Scaled Flow |
|-----------|------------|-----------|-------------|
| L253      | L253       | L268      | 813.8       |
| L253      | L253       | I276      | 35.0        |
| L253      | L253       | L292      | 145.8       |
| L253      | L253       | L294      | 185.6       |
| L253      | M262       | V250      | 4162.5      |
| L253      | I276       | I238      | 3843.9      |
| L253      | I276       | L294      | 2986.9      |
| L253      | L292       | I238      | 3731.1      |
| L253      | L294       | M239      | 3050.8      |
| L253      | L294       | I276      | 4412.5      |
| M262      | L198       | M239      | 3776.0      |
| M262      | L198       | L253      | 3085.9      |
| M262      | M201       | L253      | 3648.6      |
| M262      | M201       | L268      | 2928.0      |
| M262      | M239       | L198      | 3463.1      |
| M262      | M239       | V241      | 3344.2      |
| M262      | M239       | L294      | 2545.6      |
| M262      | V241       | M239      | 3465.0      |
| M262      | L253       | L198      | 4091.0      |
| M262      | L253       | M201      | 4987.8      |
| M262      | L253       | L268      | 3740.6      |
| M262      | M262       | L198      | 91.8        |
| M262      | M262       | M201      | 80.6        |
| M262      | M262       | M239      | 63.0        |
| M262      | M262       | V241      | 73.8        |
| M262      | M262       | V250      | 689.1       |
| M262      | M262       | L253      | 268.0       |
| M262      | M262       | L265      | 252.3       |
| M262      | M262       | L268      | 164.6       |
| M262      | M262       | L294      | 612.1       |
| M262      | L268       | M201      | 3493.8      |
| M262      | L268       | L253      | 3265.0      |
| M262      | L294       | M239      | 4833.0      |
| L265      | I197       | L198      | 3567.7      |
| L265      | L198       | I197      | 3956.2      |
| L265      | L198       | M239      | 3571.3      |
| L265      | L198       | L253      | 3495.1      |
| L265      | L198       | L294      | 2875.6      |
| L265      | M201       | L253      | 3794.8      |
| L265      | M201       | L268      | 2542.7      |
| L265      | L225       | I238      | 2717.6      |

| First Res | Second Res | Third Res | Scaled Flow |
|-----------|------------|-----------|-------------|
| L265      | L225       | M239      | 2735.6      |
| L265      | L225       | V241      | 3019.6      |
| L265      | L225       | I276      | 3247.9      |
| L265      | L225       | L294      | 3649.7      |
| L265      | I238       | L225      | 4129.9      |
| L265      | I238       | I276      | 5849.4      |
| L265      | M239       | L198      | 3607.7      |
| L265      | M239       | L225      | 2980.9      |
| L265      | M239       | V241      | 3462.0      |
| L265      | M239       | L253      | 2948.5      |
| L265      | M239       | L294      | 3028.3      |
| L265      | V241       | L225      | 3159.7      |
| L265      | V241       | M239      | 3324.6      |
| L265      | V250       | M262      | 3068.1      |
| L265      | L253       | L198      | 3175.8      |
| L265      | L253       | M201      | 3813.9      |
| L265      | L253       | M239      | 2652.0      |
| L265      | L253       | L268      | 2743.9      |
| L265      | M262       | V250      | 3654.0      |
| L265      | M262       | L294      | 3468.7      |
| L265      | L265       | I197      | 42.2        |
| L265      | L265       | L198      | 67.9        |
| L265      | L265       | M201      | 42.7        |
| L265      | L265       | L225      | 48.1        |
| L265      | L265       | I238      | 259.1       |
| L265      | L265       | M239      | 71.0        |
| L265      | L265       | V241      | 59.2        |
| L265      | L265       | V250      | 132.4       |
| L265      | L265       | L253      | 43.8        |
| L265      | L265       | M262      | 252.3       |
| L265      | L265       | L268      | 313.2       |
| L265      | L265       | I276      | 54.7        |
| L265      | L265       | L294      | 154.3       |
| L265      | L268       | M201      | 4190.7      |
| L265      | L268       | L253      | 4499.6      |
| L265      | I276       | L225      | 3339.1      |
| L265      | I276       | I238      | 3957.1      |
| L265      | I276       | L294      | 3210.8      |
| L265      | L294       | L198      | 3508.6      |
| L265      | L294       | L225      | 4803.3      |
| L265      | L294       | M239      | 3657.7      |



| First Res | Second Res | Third Res | Scaled Flow |
|-----------|------------|-----------|-------------|
| L265      | L294       | M262      | 3029.8      |
| L265      | L294       | I276      | 4110.3      |
| L268      | I197       | L198      | 4257.1      |
| L268      | L198       | I197      | 4032.4      |
| L268      | L198       | M239      | 3942.6      |
| L268      | L198       | L253      | 2819.9      |
| L268      | M201       | L253      | 4181.8      |
| L268      | I238       | I276      | 4383.6      |
| L268      | I238       | L294      | 2641.7      |
| L268      | M239       | L198      | 3622.0      |
| L268      | M239       | L294      | 3160.8      |
| L268      | V250       | M262      | 3381.8      |
| L268      | L253       | L198      | 4593.8      |
| L268      | L253       | M201      | 4734.4      |
| L268      | M262       | V250      | 3292.7      |
| L268      | M262       | L294      | 3119.0      |
| L268      | L268       | I197      | 225.6       |
| L268      | L268       | L198      | 185.6       |
| L268      | L268       | M201      | 591.5       |
| L268      | L268       | I238      | 51.4        |
| L268      | L268       | M239      | 134.3       |
| L268      | L268       | V250      | 181.9       |
| L268      | L268       | L253      | 813.8       |
| L268      | L268       | M262      | 164.6       |
| L268      | L268       | L265      | 313.2       |
| L268      | L268       | I276      | 44.5        |
| L268      | L268       | L294      | 217.1       |
| L268      | I276       | I238      | 4247.5      |
| L268      | I276       | L294      | 3035.9      |
| L268      | L294       | I238      | 3755.5      |
| L268      | L294       | M239      | 3592.8      |
| L268      | L294       | M262      | 3363.1      |
| L268      | L294       | I276      | 4454.3      |
| I276      | I197       | L198      | 3672.4      |
| I276      | L198       | I197      | 4263.9      |
| I276      | L198       | M239      | 3404.6      |
| I276      | L198       | L253      | 3972.4      |
| I276      | L225       | L277      | 4758.5      |
| I276      | L225       | L294      | 4331.6      |
| I276      | I238       | L292      | 8784.5      |
| I276      | M239       | L198      | 4325.8      |

| First Res | Second Res | Third Res | Scaled Flow |
|-----------|------------|-----------|-------------|
| I276      | M239       | V241      | 3671.1      |
| I276      | V241       | M239      | 3489.6      |
| I276      | L253       | L198      | 2927.0      |
| I276      | L253       | L268      | 3129.5      |
| I276      | L268       | L253      | 3290.4      |
| I276      | I276       | I197      | 72.1        |
| I276      | I276       | L198      | 134.3       |
| I276      | I276       | L225      | 841.0       |
| I276      | I276       | I238      | 3696.9      |
| I276      | I276       | M239      | 317.2       |
| I276      | I276       | V241      | 268.0       |
| I276      | I276       | L253      | 35.0        |
| I276      | I276       | L265      | 54.7        |
| I276      | I276       | L268      | 44.5        |
| I276      | I276       | L277      | 178.3       |
| I276      | I276       | L288      | 168.0       |
| I276      | I276       | L292      | 208.8       |
| I276      | I276       | V293      | 64.5        |
| I276      | I276       | L294      | 1088.6      |
| I276      | L277       | L225      | 2850.7      |
| I276      | L292       | I238      | 2177.5      |
| I276      | L294       | L225      | 4850.9      |
| L277      | L225       | V241      | 5925.2      |
| L277      | L225       | I276      | 4720.2      |
| L277      | L225       | L294      | 7605.2      |
| L277      | I238       | I276      | 5516.6      |
| L277      | I238       | L292      | 4181.7      |
| L277      | I238       | L294      | 4172.7      |
| L277      | V241       | L225      | 2129.0      |
| L277      | I276       | L225      | 2712.8      |
| L277      | I276       | I238      | 4667.9      |
| L277      | I276       | L294      | 4353.6      |
| L277      | L277       | I220      | 28.0        |
| L277      | L277       | L225      | 927.3       |
| L277      | L277       | I238      | 318.1       |
| L277      | L277       | V241      | 22.3        |
| L277      | L277       | I276      | 178.3       |
| L277      | L277       | L287      | 109.0       |
| L277      | L277       | L288      | 561.8       |
| L277      | L277       | M291      | 171.4       |
| L277      | L277       | L292      | 174.8       |

| First Res | Second Res | Third Res | Scaled Flow |
|-----------|------------|-----------|-------------|
| L277      | L277       | L294      | 37.7        |
| L277      | L292       | I238      | 3519.5      |
| L277      | L294       | L225      | 3035.9      |
| L277      | L294       | I238      | 2452.4      |
| L277      | L294       | I276      | 3023.9      |
| L283      | M137       | L159      | 3613.6      |
| L283      | L159       | M137      | 3341.4      |
| L283      | L159       | V161      | 4108.8      |
| L283      | V161       | L159      | 3003.2      |
| L283      | L283       | L119      | 65.4        |
| L283      | L283       | I130      | 53.7        |
| L283      | L283       | M137      | 148.8       |
| L283      | L283       | L159      | 109.0       |
| L283      | L283       | V161      | 26.0        |
| L283      | L283       | L167      | 380.9       |
| L283      | L283       | I169      | 212.9       |
| L283      | L283       | V212      | 21.7        |
| L283      | L283       | M219      | 385.5       |
| L283      | L283       | V293      | 82.4        |
| L287      | L287       | I220      | 69.0        |
| L287      | L287       | L277      | 109.0       |
| L288      | L225       | I238      | 3376.4      |
| L288      | L225       | I276      | 3414.4      |
| L288      | L225       | L277      | 2982.6      |
| L288      | I238       | L225      | 3251.5      |
| L288      | I238       | I276      | 4627.9      |
| L288      | I238       | L292      | 3777.5      |
| L288      | I276       | L225      | 3580.8      |
| L288      | I276       | I238      | 5039.9      |
| L288      | L277       | L225      | 4536.8      |
| L288      | L288       | I197      | 80.6        |
| L288      | L288       | I209      | 43.0        |
| L288      | L288       | I220      | 80.6        |
| L288      | L288       | L225      | 139.9       |
| L288      | L288       | I238      | 120.2       |
| L288      | L288       | I276      | 168.0       |
| L288      | L288       | L277      | 561.8       |
| L288      | L288       | L292      | 102.3       |
| L288      | L288       | V293      | 367.3       |
| L288      | L288       | V361      | 27.1        |
| L288      | L292       | I238      | 3628.2      |

| First Res | Second Res | Third Res | Scaled Flow |
|-----------|------------|-----------|-------------|
| L288      | V293       | V361      | 4237.2      |
| L288      | V361       | V293      | 2229.5      |
| M291      | M291       | V212      | 56.2        |
| M291      | M291       | M216      | 21.2        |
| M291      | M291       | L277      | 171.4       |
| L292      | I197       | L198      | 4017.3      |
| L292      | L198       | I197      | 3996.5      |
| L292      | L198       | L253      | 3414.2      |
| L292      | L198       | L294      | 3549.1      |
| L292      | L225       | I238      | 2345.9      |
| L292      | L225       | I276      | 3166.7      |
| L292      | L225       | L277      | 3301.8      |
| L292      | L225       | L294      | 4472.2      |
| L292      | I238       | L225      | 5277.1      |
| L292      | I238       | I276      | 7549.3      |
| L292      | I238       | L294      | 5732.3      |
| L292      | L253       | L198      | 3597.5      |
| L292      | I276       | L225      | 3868.5      |
| L292      | I276       | I238      | 4099.7      |
| L292      | I276       | L294      | 4476.7      |
| L292      | L277       | L225      | 3842.7      |
| L292      | L277       | L288      | 3389.4      |
| L292      | L288       | L277      | 2957.6      |
| L292      | L292       | I130      | 23.5        |
| L292      | L292       | I197      | 121.1       |
| L292      | L292       | L198      | 118.6       |
| L292      | L292       | L225      | 95.9        |
| L292      | L292       | I238      | 1154.0      |
| L292      | L292       | L253      | 145.8       |
| L292      | L292       | I276      | 208.8       |
| L292      | L292       | L277      | 174.8       |
| L292      | L292       | L288      | 102.3       |
| L292      | L292       | V293      | 239.1       |
| L292      | L292       | L294      | 38.6        |
| L292      | L294       | L198      | 2752.9      |
| L292      | L294       | L225      | 3652.8      |
| L292      | L294       | I238      | 2081.3      |
| L292      | L294       | I276      | 2993.1      |
| V293      | I238       | I276      | 4351.8      |
| V293      | I238       | L292      | 3134.9      |
| V293      | I276       | I238      | 4490.7      |

| First Res | Second Res | Third Res | Scaled Flow |
|-----------|------------|-----------|-------------|
| V293      | L292       | I238      | 4500.4      |
| V293      | V293       | L90       | 95.9        |
| V293      | V293       | I150      | 78.8        |
| V293      | V293       | I197      | 200.8       |
| V293      | V293       | I209      | 55.6        |
| V293      | V293       | I220      | 208.8       |
| V293      | V293       | I238      | 55.8        |
| V293      | V293       | I276      | 64.5        |
| V293      | V293       | L283      | 82.4        |
| V293      | V293       | L288      | 367.3       |
| V293      | V293       | L292      | 239.1       |
| V293      | V293       | V361      | 437.1       |
| V293      | V293       | L367      | 60.7        |
| L294      | I197       | L198      | 3772.0      |
| L294      | L198       | I197      | 4807.2      |
| L294      | L198       | L253      | 4283.7      |
| L294      | L225       | L277      | 8734.3      |
| L294      | I238       | I276      | 4784.6      |
| L294      | I238       | L292      | 5588.6      |
| L294      | M239       | V241      | 4428.2      |
| L294      | V241       | M239      | 2945.6      |
| L294      | V250       | M262      | 2547.9      |
| L294      | L253       | L198      | 2995.8      |
| L294      | L253       | L268      | 3412.9      |
| L294      | M262       | V250      | 4716.4      |
| L294      | L268       | L253      | 3563.9      |
| L294      | I276       | I238      | 6352.8      |
| L294      | L277       | L225      | 2186.4      |
| L294      | L292       | I238      | 2771.0      |
| L294      | L294       | L125      | 21.8        |
| L294      | L294       | I197      | 278.3       |
| L294      | L294       | L198      | 581.5       |
| L294      | L294       | L225      | 2221.5      |
| L294      | L294       | I238      | 539.6       |
| L294      | L294       | M239      | 712.6       |
| L294      | L294       | V241      | 204.7       |
| L294      | L294       | V250      | 70.5        |
| L294      | L294       | L253      | 185.6       |
| L294      | L294       | M262      | 612.1       |
| L294      | L294       | L265      | 154.3       |
| L294      | L294       | L268      | 217.1       |

| First Res | Second Res | Third Res | Scaled Flow |
|-----------|------------|-----------|-------------|
| L294      | L294       | I276      | 1088.6      |
| L294      | L294       | L277      | 37.7        |
| L294      | L294       | L292      | 38.6        |
| V300      | V186       | V187      | 3164.7      |
| V300      | V187       | V186      | 3310.7      |
| V300      | V300       | V186      | 32.5        |
| V300      | V300       | V187      | 40.5        |
| V300      | V300       | M239      | 23.5        |
| V323      | L30        | L58       | 2649.9      |
| V323      | L30        | L75       | 2851.1      |
| V323      | L58        | L30       | 4105.7      |
| V323      | L58        | L89       | 4087.2      |
| V323      | L75        | L30       | 3193.2      |
| V323      | L77        | L78       | 4951.7      |
| V323      | L77        | M81       | 5193.7      |
| V323      | L77        | L141      | 3686.0      |
| V323      | L77        | I149      | 3709.6      |
| V323      | L77        | L174      | 3705.6      |
| V323      | L78        | L77       | 4085.4      |
| V323      | L78        | M81       | 3755.1      |
| V323      | L78        | L89       | 4495.5      |
| V323      | L78        | M109      | 3475.9      |
| V323      | L78        | I149      | 3101.2      |
| V323      | L78        | V343      | 4206.9      |
| V323      | M81        | L77       | 4375.3      |
| V323      | M81        | L78       | 3834.2      |
| V323      | M81        | M109      | 3256.6      |
| V323      | L89        | L58       | 2985.5      |
| V323      | L89        | L78       | 4614.2      |
| V323      | L89        | M109      | 4139.7      |
| V323      | L89        | L141      | 3595.3      |
| V323      | L89        | V343      | 3328.2      |
| V323      | M109       | L78       | 3233.9      |
| V323      | M109       | M81       | 2967.4      |
| V323      | M109       | L89       | 3752.4      |
| V323      | M109       | V343      | 3444.2      |
| V323      | L141       | L77       | 3041.1      |
| V323      | L141       | L89       | 3502.7      |
| V323      | L141       | I144      | 4023.9      |
| V323      | I144       | L141      | 3265.3      |
| V323      | I144       | L174      | 2513.5      |

| First Res | Second Res | Third Res | Scaled Flow |
|-----------|------------|-----------|-------------|
| V323      | I149       | L77       | 5488.0      |
| V323      | I149       | L78       | 5560.8      |
| V323      | L174       | L77       | 4451.5      |
| V323      | L174       | I144      | 4509.8      |
| V323      | V323       | L30       | 78.8        |
| V323      | V323       | V41       | 31.0        |
| V323      | V323       | L58       | 394.9       |
| V323      | V323       | L75       | 126.2       |
| V323      | V323       | L77       | 243.7       |
| V323      | V323       | L78       | 118.6       |
| V323      | V323       | M81       | 128.9       |
| V323      | V323       | V86       | 57.7        |
| V323      | V323       | I87       | 927.3       |
| V323      | V323       | L89       | 131.6       |
| V323      | V323       | M109      | 87.9        |
| V323      | V323       | L141      | 118.6       |
| V323      | V323       | I144      | 47.8        |
| V323      | V323       | I149      | 774.5       |
| V323      | V323       | L174      | 439.7       |
| V323      | V323       | I220      | 21.2        |
| V323      | V323       | V343      | 95.9        |
| V323      | V323       | L357      | 52.0        |
| V323      | V343       | L78       | 3995.1      |
| V323      | V343       | L89       | 3079.3      |
| V323      | V343       | M109      | 3515.5      |
| V333      | I144       | L174      | 2893.7      |
| V333      | L174       | I144      | 3166.9      |
| V333      | L174       | V186      | 2727.1      |
| V333      | M182       | V187      | 3159.7      |
| V333      | V186       | L174      | 2672.9      |
| V333      | V186       | V187      | 3150.8      |
| V333      | V187       | M182      | 3767.0      |
| V333      | V187       | V186      | 3493.1      |
| V333      | V333       | I144      | 27.4        |
| V333      | V333       | L174      | 42.6        |
| V333      | V333       | M182      | 27.1        |
| V333      | V333       | V186      | 38.7        |
| V333      | V333       | V187      | 62.5        |
| V333      | V333       | L357      | 41.5        |
| L337      | V26        | L78       | 3044.6      |
| L337      | L77        | L78       | 3691.8      |

| First Res | Second Res | Third Res | Scaled Flow |
|-----------|------------|-----------|-------------|
| L337      | L78        | V26       | 3871.1      |
| L337      | L78        | L77       | 5089.4      |
| L337      | L78        | V343      | 4983.3      |
| L337      | L337       | V26       | 75.4        |
| L337      | L337       | L58       | 883.2       |
| L337      | L337       | L77       | 52.5        |
| L337      | L337       | L78       | 196.9       |
| L337      | L337       | I150      | 106.7       |
| L337      | L337       | V343      | 35.9        |
| L337      | V343       | L78       | 3335.9      |
| V343      | V26        | L170      | 4412.8      |
| V343      | L58        | I87       | 2930.3      |
| V343      | L58        | L89       | 2747.2      |
| V343      | L58        | L337      | 3825.1      |
| V343      | L77        | L78       | 3121.1      |
| V343      | L77        | M81       | 4403.1      |
| V343      | L77        | L141      | 3595.1      |
| V343      | L77        | I149      | 4171.7      |
| V343      | L78        | L77       | 9139.2      |
| V343      | L78        | M81       | 7183.3      |
| V343      | L78        | L89       | 6846.4      |
| V343      | L78        | L141      | 6427.2      |
| V343      | L78        | I149      | 8148.6      |
| V343      | L78        | L170      | 7280.6      |
| V343      | M81        | L77       | 4709.5      |
| V343      | M81        | L78       | 2623.9      |
| V343      | M81        | L141      | 3460.6      |
| V343      | M81        | I149      | 3231.1      |
| V343      | M81        | L170      | 3406.1      |
| V343      | I87        | L58       | 4057.0      |
| V343      | I87        | V323      | 4340.2      |
| V343      | L89        | L58       | 4585.3      |
| V343      | L89        | L78       | 4004.2      |
| V343      | L89        | M109      | 3775.2      |
| V343      | L89        | L141      | 5547.5      |
| V343      | L89        | L170      | 6259.6      |
| V343      | M109       | L89       | 4456.5      |
| V343      | M109       | L170      | 6087.1      |
| V343      | M112       | L170      | 3792.8      |
| V343      | L141       | L77       | 2849.4      |
| V343      | L141       | L78       | 1739.7      |

| First Res | Second Res | Third Res | Scaled Flow |
|-----------|------------|-----------|-------------|
| V343      | L141       | M81       | 2564.4      |
| V343      | L141       | L89       | 2567.4      |
| V343      | L141       | L170      | 2916.2      |
| V343      | I149       | L77       | 3884.1      |
| V343      | I149       | L78       | 2590.9      |
| V343      | I149       | M81       | 2812.6      |
| V343      | I149       | V323      | 3222.9      |
| V343      | L170       | V26       | 2393.5      |
| V343      | L170       | L78       | 1809.8      |
| V343      | L170       | M81       | 2317.9      |
| V343      | L170       | L89       | 2660.4      |
| V343      | L170       | M109      | 2191.5      |
| V343      | L170       | M112      | 2676.6      |
| V343      | L170       | L141      | 2678.1      |
| V343      | V323       | I87       | 3055.2      |
| V343      | V323       | I149      | 3461.6      |
| V343      | L337       | L58       | 2999.4      |
| V343      | V343       | V16       | 50.1        |
| V343      | V343       | V26       | 289.0       |
| V343      | V343       | L58       | 106.7       |
| V343      | V343       | L77       | 95.9        |
| V343      | V343       | L78       | 1890.5      |
| V343      | V343       | M81       | 126.2       |
| V343      | V343       | I87       | 347.8       |
| V343      | V343       | L89       | 601.7       |
| V343      | V343       | M109      | 912.4       |
| V343      | V343       | M112      | 109.0       |
| V343      | V343       | L116      | 42.5        |
| V343      | V343       | L141      | 33.4        |
| V343      | V343       | I149      | 70.5        |
| V343      | V343       | L170      | 21.7        |
| V343      | V343       | V323      | 95.9        |
| V343      | V343       | L337      | 35.9        |
| L357      | L174       | V323      | 2596.6      |
| L357      | V323       | L174      | 3079.5      |
| L357      | L357       | V45       | 63.2        |
| L357      | L357       | L66       | 120.2       |
| L357      | L357       | V86       | 119.9       |
| L357      | L357       | L90       | 111.6       |
| L357      | L357       | L174      | 22.7        |
| L357      | L357       | V186      | 261.3       |

| First Res | Second Res | Third Res | Scaled Flow |
|-----------|------------|-----------|-------------|
| L357      | L357       | V323      | 52.0        |
| L357      | L357       | V333      | 41.5        |
| L357      | L357       | V361      | 125.7       |
| L357      | L357       | L367      | 386.7       |
| V361      | V361       | L90       | 188.0       |
| V361      | V361       | I150      | 31.1        |
| V361      | V361       | L288      | 27.1        |
| V361      | V361       | V293      | 437.1       |
| V361      | V361       | L357      | 125.7       |
| V361      | V361       | L367      | 215.8       |
| L367      | L367       | L90       | 368.4       |
| L367      | L367       | V186      | 56.6        |
| L367      | L367       | V293      | 60.7        |
| L367      | L367       | L357      | 386.7       |
| L367      | L367       | V361      | 215.8       |

**Table S9. Community membership for apo inactive p38y**

---

|          |                                                                                                                                                               |
|----------|---------------------------------------------------------------------------------------------------------------------------------------------------------------|
| module1  | 16, 26, 30, 33, 41, 53, 58, 75, 77, 78, 81, 87, 89, 109, 112, 116, 119, 137, 141, 144, 149, 161, 169, 170, 182, 215, 323, 337, 343                            |
| module2  | 125, 130, 150, 197, 198, 201, 212, 220, 225, 238, 239, 241, 250, 253, 262, 265, 268, 276, 277, 287, 288, 291, 292, 293, 294, 300                              |
| module3  | 16, 26, 30, 33, 41, 53, 78, 81, 89, 109, 112, 116, 119, 120, 130, 134, 137, 141, 154, 159, 161, 167, 169, 170, 215, 219, 220, 283, 343                        |
| module4  | 26, 58, 66, 75, 77, 78, 81, 86, 87, 89, 90, 109, 141, 144, 149, 169, 170, 174, 182, 186, 187, 323, 343, 357                                                   |
| module5  | 150, 174, 197, 198, 201, 225, 238, 239, 241, 250, 253, 262, 265, 268, 276, 288, 292, 293, 294                                                                 |
| module6  | 33, 41, 53, 55, 58, 77, 78, 81, 87, 89, 90, 109, 112, 116, 119, 130, 137, 141, 144, 149, 159, 161, 167, 169, 170, 174, 187, 201, 212, 215, 220, 283, 323, 333 |
| module7  | 30, 41, 58, 75, 77, 78, 81, 86, 87, 89, 109, 119, 141, 144, 149, 170, 174, 220, 323, 343, 357                                                                 |
| module8  | 16, 23, 26, 30, 33, 41, 45, 53, 55, 58, 66, 75, 77, 78, 81, 87, 89, 109, 112, 116, 119, 134, 137, 141, 149, 150, 159, 161, 169, 170, 283, 323, 337, 343, 357  |
| module9  | 58, 66, 77, 78, 81, 86, 89, 90, 144, 149, 174, 182, 186, 187, 239, 300, 333, 357, 367                                                                         |
| module10 | 116, 119, 120, 130, 137, 141, 144, 154, 159, 161, 167, 169, 212, 215, 219, 283, 292, 293                                                                      |
| module11 | 90, 150, 197, 209, 220, 238, 276, 283, 288, 292, 293, 357, 361, 367                                                                                           |
| module12 | 45, 66, 77, 86, 90, 141, 144, 174, 182, 186, 187, 293, 323, 357, 361, 367                                                                                     |
| module13 | 26, 58, 75, 81, 87, 149, 182, 343                                                                                                                             |
| module14 | 33, 120, 125, 150, 169, 220, 277, 287, 288, 294, 323                                                                                                          |
| module15 | 137, 209, 216, 288, 291, 293                                                                                                                                  |
| module16 | 78, 87                                                                                                                                                        |
| module17 | 58, 116, 141                                                                                                                                                  |
| module18 | 89, 149                                                                                                                                                       |
| module19 | 77, 109, 170                                                                                                                                                  |
| module20 | 78, 323                                                                                                                                                       |
| module21 | 141, 323                                                                                                                                                      |
| module22 | 137, 170                                                                                                                                                      |
| module23 | 58, 77                                                                                                                                                        |
| module24 | 78, 174                                                                                                                                                       |
| module25 | 141, 144, 149                                                                                                                                                 |
| module26 | 141, 174                                                                                                                                                      |
| module27 | 285                                                                                                                                                           |

**Table S10.** Methyl 3-residue flow for +ATP inactive p38γ

| First Res | Second Res | Third Res | Scaled Flow | First Res | Second Res | Third Res | Scaled Flow |
|-----------|------------|-----------|-------------|-----------|------------|-----------|-------------|
| V16       | V16        | V26       | 972.2       | V16       | L89        | L174      | 6330        |
| V16       | V16        | V33       | 605.2       | V16       | M112       | I87       | 3942.1      |
| V16       | V16        | L77       | 500.6       | V16       | M112       | L89       | 3509.3      |
| V16       | V16        | L78       | 1535.8      | V16       | M112       | L174      | 3670.2      |
| V16       | V16        | M81       | 122.7       | V16       | I144       | L77       | 3557.2      |
| V16       | V16        | I87       | 464.3       | V16       | I144       | L78       | 3179.7      |
| V16       | V16        | L89       | 1452.5      | V16       | I144       | M81       | 3640.4      |
| V16       | V16        | M109      | 191.4       | V16       | L170       | V26       | 3736.3      |
| V16       | V16        | M112      | 220.8       | V16       | L170       | L337      | 3084        |
| V16       | V16        | I144      | 105.2       | V16       | L174       | L77       | 6003.6      |
| V16       | V16        | L170      | 76.6        | V16       | L174       | M81       | 6106.5      |
| V16       | V16        | L174      | 847.3       | V16       | L174       | L89       | 4931.1      |
| V16       | V16        | L337      | 813.3       | V16       | L174       | M112      | 5810.5      |
| V16       | V26        | L77       | 5494.1      | V16       | L337       | V26       | 4792.3      |
| V16       | V26        | I87       | 5331.1      | V16       | L337       | L78       | 4977.8      |
| V16       | V26        | L170      | 8183.6      | V16       | L337       | L170      | 6260.4      |
| V16       | V26        | L337      | 5170.7      | V23       | V23        | V45       | 97.3        |
| V16       | L77        | V26       | 4249.1      | V23       | V23        | V134      | 237         |
| V16       | L77        | L78       | 4033.8      | V23       | V23        | I276      | 527.7       |
| V16       | L77        | M81       | 6067.7      | V23       | V23        | L277      | 205.7       |
| V16       | L77        | L89       | 4406.7      | V23       | I276       | L277      | 4855.1      |
| V16       | L77        | I144      | 5591.2      | V23       | L277       | I276      | 3617        |
| V16       | L77        | L174      | 4911.9      | V26       | V26        | V16       | 972.2       |
| V16       | L78        | L77       | 6521        | V26       | V26        | L30       | 76.6        |
| V16       | L78        | M81       | 8244.2      | V26       | V26        | V53       | 142.7       |
| V16       | L78        | I144      | 8079.4      | V26       | V26        | L75       | 237         |
| V16       | L78        | L337      | 6715.2      | V26       | V26        | L77       | 2456.8      |
| V16       | M81        | L77       | 4009.4      | V26       | V26        | L78       | 972.2       |
| V16       | M81        | L78       | 3369.8      | V26       | V26        | M81       | 153.8       |
| V16       | M81        | L89       | 2874.6      | V26       | V26        | V86       | 916.4       |
| V16       | M81        | I144      | 3781        | V26       | V26        | I87       | 2128.9      |
| V16       | M81        | L174      | 3301.3      | V26       | V26        | L89       | 2128.9      |
| V16       | I87        | V26       | 4006.2      | V26       | V26        | M112      | 562.2       |
| V16       | I87        | L89       | 4022.3      | V26       | V26        | I144      | 165.5       |
| V16       | I87        | M112      | 4961.3      | V26       | V26        | I149      | 1225.9      |
| V16       | L89        | L77       | 6914.3      | V26       | V26        | L170      | 3940.5      |
| V16       | L89        | M81       | 6825.6      | V26       | V26        | L174      | 1275.3      |
| V16       | L89        | I87       | 6495.2      | V26       | V26        | L337      | 2767.5      |
| V16       | L89        | M112      | 7131.9      | V26       | V53        | M112      | 3324        |

| First Res | Second Res | Third Res | Scaled Flow |
|-----------|------------|-----------|-------------|
| V26       | L77        | L78       | 6410.9      |
| V26       | L77        | M81       | 10309.9     |
| V26       | L77        | I144      | 8929.4      |
| V26       | L77        | L174      | 6603        |
| V26       | L78        | L77       | 3816        |
| V26       | L78        | M81       | 6814.6      |
| V26       | L78        | I144      | 6466.2      |
| V26       | L78        | L337      | 4386        |
| V26       | M81        | L77       | 3321.8      |
| V26       | M81        | L78       | 3688.7      |
| V26       | M81        | L89       | 2717.1      |
| V26       | M81        | I144      | 3740.2      |
| V26       | M81        | L174      | 3176.9      |
| V26       | L89        | M81       | 7622.7      |
| V26       | L89        | M112      | 6682.5      |
| V26       | L89        | L174      | 6382.2      |
| V26       | M112       | V53       | 5031.8      |
| V26       | M112       | L89       | 3536.8      |
| V26       | I144       | L77       | 2933.3      |
| V26       | I144       | L78       | 3568.7      |
| V26       | I144       | M81       | 3813.4      |
| V26       | L174       | L77       | 4474.3      |
| V26       | L174       | M81       | 6681.4      |
| V26       | L174       | L89       | 4784.4      |
| V26       | L337       | L78       | 8036.3      |
| L30       | V26        | L77       | 4222        |
| L30       | L30        | V26       | 76.6        |
| L30       | L30        | L77       | 68.6        |
| L30       | L30        | M291      | 70.7        |
| L30       | L77        | V26       | 4127.7      |
| V33       | V16        | L89       | 5456.2      |
| V33       | V33        | V16       | 605.2       |
| V33       | V33        | L89       | 98.4        |
| V33       | V33        | M109      | 305.1       |
| V33       | V33        | L174      | 157.2       |
| V33       | L89        | V16       | 3198.9      |
| V33       | L89        | L174      | 4515.1      |
| V33       | L174       | L89       | 5091.1      |
| V41       | V41        | L119      | 527.7       |
| V45       | V45        | V23       | 97.3        |
| V45       | V45        | V300      | 132.4       |

| First Res | Second Res | Third Res | Scaled Flow |
|-----------|------------|-----------|-------------|
| V53       | V26        | L77       | 4451.9      |
| V53       | V26        | I87       | 3835.1      |
| V53       | V26        | L89       | 3515.8      |
| V53       | V26        | L174      | 3598.3      |
| V53       | V53        | V26       | 142.7       |
| V53       | V53        | L77       | 133.9       |
| V53       | V53        | V86       | 598.6       |
| V53       | V53        | I87       | 435.2       |
| V53       | V53        | L89       | 863.5       |
| V53       | V53        | M112      | 1373.2      |
| V53       | V53        | L116      | 1452.5      |
| V53       | V53        | V161      | 2494.4      |
| V53       | V53        | I169      | 124.1       |
| V53       | V53        | L174      | 256.9       |
| V53       | V53        | M219      | 3180.2      |
| V53       | L77        | V26       | 4391.6      |
| V53       | L77        | V86       | 3649.9      |
| V53       | L77        | L89       | 3966.7      |
| V53       | L77        | L174      | 4529.9      |
| V53       | V86        | L77       | 5731        |
| V53       | I87        | V26       | 5310.1      |
| V53       | I87        | L89       | 4404.6      |
| V53       | L89        | V26       | 6291.8      |
| V53       | L89        | L77       | 7196.1      |
| V53       | L89        | I87       | 5692.8      |
| V53       | L89        | L174      | 6743.3      |
| V53       | M112       | L174      | 6494.6      |
| V53       | V161       | I169      | 8068.3      |
| V53       | I169       | V161      | 2447.6      |
| V53       | L174       | V26       | 4237.6      |
| V53       | L174       | L77       | 5408        |
| V53       | L174       | L89       | 4437.6      |
| V53       | L174       | M112      | 3446.1      |
| L58       | L58        | M81       | 70.7        |
| L66       | L66        | I197      | 598.6       |
| L66       | L66        | L225      | 237         |
| L66       | L66        | V241      | 407.7       |
| L66       | L66        | L265      | 173         |
| L66       | L66        | L268      | 272.3       |
| L66       | L66        | I276      | 70.7        |
| L66       | L66        | L288      | 153.8       |



| First Res | Second Res | Third Res | Scaled Flow |
|-----------|------------|-----------|-------------|
| L66       | L66        | L292      | 495.1       |
| L66       | I197       | L225      | 5033.2      |
| L66       | I197       | V241      | 5291.1      |
| L66       | I197       | L265      | 6754.8      |
| L66       | I197       | L268      | 5690.2      |
| L66       | L225       | I197      | 3728.1      |
| L66       | L225       | V241      | 4790.5      |
| L66       | L225       | L288      | 4550.9      |
| L66       | L225       | L292      | 4740.7      |
| L66       | V241       | I197      | 4628.4      |
| L66       | V241       | L225      | 5657.4      |
| L66       | V241       | L292      | 5030.4      |
| L66       | L265       | I197      | 4637.4      |
| L66       | L265       | L268      | 4647.2      |
| L66       | L268       | I197      | 4389.1      |
| L66       | L268       | L265      | 5221.3      |
| L66       | L288       | L225      | 4043.8      |
| L66       | L288       | L292      | 4721.8      |
| L66       | L292       | L225      | 5979.1      |
| L66       | L292       | V241      | 5372.4      |
| L66       | L292       | L288      | 6702.1      |
| L75       | V26        | L89       | 4770.6      |
| L75       | V26        | L170      | 5627.7      |
| L75       | V26        | L337      | 5053.8      |
| L75       | L75        | V26       | 237         |
| L75       | L75        | L89       | 122.7       |
| L75       | L75        | L170      | 83.1        |
| L75       | L75        | L337      | 122.7       |
| L75       | L89        | V26       | 4002.1      |
| L75       | L170       | V26       | 4296.9      |
| L75       | L170       | L337      | 3775.6      |
| L75       | L337       | V26       | 4239.7      |
| L75       | L337       | L170      | 4148.3      |
| L77       | V26        | L170      | 9463.4      |
| L77       | V53        | M112      | 3350.8      |
| L77       | V53        | L116      | 3739.7      |
| L77       | V53        | V161      | 4324.6      |
| L77       | L77        | V16       | 500.6       |
| L77       | L77        | V26       | 2456.8      |
| L77       | L77        | L30       | 68.6        |
| L77       | L77        | V53       | 133.9       |

| First Res | Second Res | Third Res | Scaled Flow |
|-----------|------------|-----------|-------------|
| L77       | L77        | L78       | 2798.1      |
| L77       | L77        | M81       | 3022.2      |
| L77       | L77        | V86       | 2095.7      |
| L77       | L77        | I87       | 644.1       |
| L77       | L77        | L89       | 3518        |
| L77       | L77        | M112      | 500.6       |
| L77       | L77        | L116      | 223.3       |
| L77       | L77        | I144      | 1986.2      |
| L77       | L77        | I149      | 550.7       |
| L77       | L77        | V161      | 173.6       |
| L77       | L77        | L167      | 266         |
| L77       | L77        | L170      | 373.3       |
| L77       | L77        | L174      | 3647.1      |
| L77       | L77        | L337      | 1349.8      |
| L77       | L78        | L337      | 7244.4      |
| L77       | I87        | L89       | 3272.1      |
| L77       | I87        | M112      | 4649.1      |
| L77       | L89        | I87       | 8734.5      |
| L77       | L89        | M112      | 8842.5      |
| L77       | M112       | V53       | 4947.6      |
| L77       | M112       | I87       | 4242        |
| L77       | M112       | L89       | 3022.6      |
| L77       | M112       | L116      | 4673.6      |
| L77       | L116       | V53       | 4288.2      |
| L77       | L116       | M112      | 3629.5      |
| L77       | V161       | V53       | 4627.5      |
| L77       | L170       | V26       | 3949        |
| L77       | L337       | L78       | 4578.8      |
| L78       | V26        | I87       | 5400.6      |
| L78       | V26        | L170      | 7349.9      |
| L78       | L77        | V86       | 9764.6      |
| L78       | L77        | L89       | 6498.4      |
| L78       | L78        | V16       | 1535.8      |
| L78       | L78        | V26       | 972.2       |
| L78       | L78        | L77       | 2798.1      |
| L78       | L78        | M81       | 2627.8      |
| L78       | L78        | V86       | 165.5       |
| L78       | L78        | I87       | 435.2       |
| L78       | L78        | L89       | 1452.5      |
| L78       | L78        | M112      | 254.1       |
| L78       | L78        | L141      | 142.7       |

| First Res | Second Res | Third Res | Scaled Flow |
|-----------|------------|-----------|-------------|
| L78       | L78        | I144      | 2245.1      |
| L78       | L78        | L167      | 637         |
| L78       | L78        | L170      | 191.4       |
| L78       | L78        | L174      | 2152.5      |
| L78       | L78        | V285      | 527.7       |
| L78       | L78        | L337      | 4139.3      |
| L78       | V86        | L77       | 2907.8      |
| L78       | V86        | I87       | 3660.3      |
| L78       | V86        | L89       | 2943.1      |
| L78       | I87        | V26       | 3970.4      |
| L78       | I87        | V86       | 4875.9      |
| L78       | I87        | L89       | 3988.8      |
| L78       | I87        | M112      | 4803.8      |
| L78       | L89        | L77       | 4254.9      |
| L78       | L89        | V86       | 6471.1      |
| L78       | L89        | I87       | 6583.9      |
| L78       | L89        | M112      | 6954.6      |
| L78       | L89        | L174      | 4867.4      |
| L78       | M112       | I87       | 4061.6      |
| L78       | M112       | L89       | 3562.5      |
| L78       | M112       | L174      | 3133.5      |
| L78       | L170       | V26       | 4218.2      |
| L78       | L170       | L337      | 2432.5      |
| L78       | L174       | L89       | 6152.4      |
| L78       | L174       | M112      | 7732        |
| L78       | L337       | L170      | 11336.1     |
| M81       | V16        | L78       | 2620.6      |
| M81       | V16        | L89       | 2874.6      |
| M81       | V26        | L77       | 3001        |
| M81       | V26        | I87       | 4263.9      |
| M81       | V26        | L89       | 3278.4      |
| M81       | V26        | L337      | 3978        |
| M81       | L77        | V26       | 10941.9     |
| M81       | L77        | L89       | 6704        |
| M81       | L78        | V16       | 9028.2      |
| M81       | L78        | L337      | 8952.6      |
| M81       | M81        | V16       | 122.7       |
| M81       | M81        | V26       | 153.8       |
| M81       | M81        | L58       | 70.7        |
| M81       | M81        | L77       | 3022.2      |
| M81       | M81        | L78       | 2627.8      |

| First Res | Second Res | Third Res | Scaled Flow |
|-----------|------------|-----------|-------------|
| M81       | M81        | V86       | 598.6       |
| M81       | M81        | I87       | 178.1       |
| M81       | M81        | L89       | 1452.5      |
| M81       | M81        | M112      | 598.6       |
| M81       | M81        | L116      | 407.7       |
| M81       | M81        | I144      | 1157.6      |
| M81       | M81        | L167      | 272.3       |
| M81       | M81        | L174      | 1782        |
| M81       | M81        | V285      | 205.7       |
| M81       | M81        | L337      | 598.6       |
| M81       | V86        | I87       | 5171.8      |
| M81       | I87        | V26       | 4432.9      |
| M81       | I87        | V86       | 3538.9      |
| M81       | I87        | L89       | 3587.7      |
| M81       | I87        | M112      | 3695.8      |
| M81       | L89        | V16       | 6825.6      |
| M81       | L89        | V26       | 7349.5      |
| M81       | L89        | L77       | 4122        |
| M81       | L89        | I87       | 7736.3      |
| M81       | L89        | M112      | 5802.2      |
| M81       | L89        | L174      | 5177.7      |
| M81       | M112       | I87       | 5401.2      |
| M81       | M112       | L89       | 3932.4      |
| M81       | L174       | L89       | 5818.6      |
| M81       | L337       | V26       | 6044        |
| M81       | L337       | L78       | 4182        |
| V86       | V26        | L170      | 5739.8      |
| V86       | V26        | L337      | 6248.1      |
| V86       | V53        | V161      | 4439.1      |
| V86       | V53        | M219      | 6315.8      |
| V86       | L77        | L78       | 9174        |
| V86       | L77        | M81       | 7197.1      |
| V86       | L77        | L89       | 5890.8      |
| V86       | L77        | I144      | 8263.1      |
| V86       | L77        | L174      | 6766.7      |
| V86       | L78        | L77       | 3359        |
| V86       | L78        | M81       | 3968.4      |
| V86       | L78        | L89       | 2943.1      |
| V86       | L78        | I144      | 4398.4      |
| V86       | L78        | L174      | 3517.3      |
| V86       | L78        | L337      | 4799        |

| First Res | Second Res | Third Res | Scaled Flow |
|-----------|------------|-----------|-------------|
| V86       | M81        | L77       | 3926.9      |
| V86       | M81        | L78       | 5913.7      |
| V86       | V86        | V26       | 916.4       |
| V86       | V86        | V53       | 598.6       |
| V86       | V86        | L77       | 2095.7      |
| V86       | V86        | L78       | 165.5       |
| V86       | V86        | M81       | 598.6       |
| V86       | V86        | I87       | 1623.2      |
| V86       | V86        | L89       | 1452.5      |
| V86       | V86        | M112      | 813.3       |
| V86       | V86        | L116      | 334         |
| V86       | V86        | I144      | 165.5       |
| V86       | V86        | I149      | 765.6       |
| V86       | V86        | V161      | 916.4       |
| V86       | V86        | I169      | 248.1       |
| V86       | V86        | L170      | 813.3       |
| V86       | V86        | L174      | 982.9       |
| V86       | V86        | M219      | 139         |
| V86       | V86        | L337      | 272.3       |
| V86       | L89        | L77       | 4742.5      |
| V86       | L89        | L78       | 6471.1      |
| V86       | L89        | L174      | 6108.4      |
| V86       | L116       | M219      | 5011.9      |
| V86       | I144       | L77       | 3025.5      |
| V86       | I144       | L78       | 4398.4      |
| V86       | V161       | V53       | 5260.4      |
| V86       | V161       | M219      | 6252.3      |
| V86       | L170       | V26       | 5458.4      |
| V86       | L170       | L337      | 5190        |
| V86       | L174       | L77       | 4523.6      |
| V86       | L174       | L78       | 6421.9      |
| V86       | L174       | L89       | 5072.3      |
| V86       | M219       | V53       | 4061.1      |
| V86       | M219       | L116      | 3926.7      |
| V86       | M219       | V161      | 3392.6      |
| V86       | L337       | V26       | 4067        |
| V86       | L337       | L78       | 5516.2      |
| V86       | L337       | L170      | 3552.4      |
| I87       | V26        | L77       | 6520.3      |
| I87       | V26        | L170      | 7047.1      |
| I87       | V26        | L337      | 7222.4      |

| First Res | Second Res | Third Res | Scaled Flow |
|-----------|------------|-----------|-------------|
| I87       | V53        | V161      | 5561.3      |
| I87       | L77        | V26       | 3639.3      |
| I87       | L77        | L78       | 5344.5      |
| I87       | L77        | M81       | 6188.8      |
| I87       | L77        | L89       | 3911.7      |
| I87       | L77        | L174      | 5263.7      |
| I87       | L78        | L77       | 4635.6      |
| I87       | L78        | M81       | 5444.9      |
| I87       | L78        | L174      | 4178.3      |
| I87       | L78        | L337      | 5321        |
| I87       | M81        | L77       | 4108.9      |
| I87       | M81        | L78       | 4167.9      |
| I87       | M81        | L89       | 2580.4      |
| I87       | M81        | L174      | 3506.7      |
| I87       | I87        | V16       | 464.3       |
| I87       | I87        | V26       | 2128.9      |
| I87       | I87        | V53       | 435.2       |
| I87       | I87        | L77       | 644.1       |
| I87       | I87        | L78       | 435.2       |
| I87       | I87        | M81       | 178.1       |
| I87       | I87        | V86       | 1623.2      |
| I87       | I87        | L89       | 2767.5      |
| I87       | I87        | M112      | 1912.2      |
| I87       | I87        | L116      | 527.7       |
| I87       | I87        | I149      | 237         |
| I87       | I87        | V161      | 132.4       |
| I87       | I87        | L167      | 165.5       |
| I87       | I87        | L170      | 972.2       |
| I87       | I87        | L174      | 751         |
| I87       | I87        | L337      | 527.7       |
| I87       | L89        | L77       | 8455.6      |
| I87       | L89        | M81       | 8401.4      |
| I87       | L89        | L174      | 8348.5      |
| I87       | V161       | V53       | 3940.3      |
| I87       | L170       | V26       | 4640.4      |
| I87       | L174       | L77       | 5587.7      |
| I87       | L174       | L78       | 5113.8      |
| I87       | L174       | M81       | 5606.8      |
| I87       | L174       | L89       | 4099.8      |
| I87       | L337       | V26       | 3736.9      |
| I87       | L337       | L78       | 5686.8      |

| First Res | Second Res | Third Res | Scaled Flow |
|-----------|------------|-----------|-------------|
| L89       | V26        | L170      | 8908.9      |
| L89       | V26        | L337      | 7338.8      |
| L89       | V53        | V161      | 6426.8      |
| L89       | V53        | M219      | 7312.2      |
| L89       | L77        | I144      | 10590.7     |
| L89       | L78        | I144      | 7107.7      |
| L89       | L78        | L337      | 7309.2      |
| L89       | L89        | V16       | 1452.5      |
| L89       | L89        | V26       | 2128.9      |
| L89       | L89        | V33       | 98.4        |
| L89       | L89        | V53       | 863.5       |
| L89       | L89        | L75       | 122.7       |
| L89       | L89        | L77       | 3518        |
| L89       | L89        | L78       | 1452.5      |
| L89       | L89        | M81       | 1452.5      |
| L89       | L89        | V86       | 1452.5      |
| L89       | L89        | I87       | 2767.5      |
| L89       | L89        | M109      | 220.8       |
| L89       | L89        | M112      | 2366.9      |
| L89       | L89        | L116      | 637         |
| L89       | L89        | I144      | 205.7       |
| L89       | L89        | I149      | 637         |
| L89       | L89        | V161      | 165.5       |
| L89       | L89        | L167      | 142.7       |
| L89       | L89        | L170      | 357.2       |
| L89       | L89        | L174      | 3791.5      |
| L89       | L89        | M219      | 94.6        |
| L89       | L89        | L337      | 495.1       |
| L89       | L116       | M219      | 6069.9      |
| L89       | I144       | L77       | 2739.9      |
| L89       | I144       | L78       | 3428.6      |
| L89       | V161       | V53       | 3732.7      |
| L89       | V161       | M219      | 4474.9      |
| L89       | L170       | V26       | 4043.9      |
| L89       | L170       | L337      | 4010.8      |
| L89       | M219       | V53       | 3701        |
| L89       | M219       | L116      | 3468        |
| L89       | M219       | V161      | 3899.6      |
| L89       | L337       | V26       | 3712.9      |
| L89       | L337       | L78       | 4627.8      |
| L89       | L337       | L170      | 4470.4      |

| First Res | Second Res | Third Res | Scaled Flow |
|-----------|------------|-----------|-------------|
| L90       | L90        | V285      | 133.9       |
| M109      | V16        | L89       | 3952.9      |
| M109      | L89        | V16       | 4112.7      |
| M109      | L89        | M112      | 3957.4      |
| M109      | L89        | L174      | 4991.3      |
| M109      | M109       | V16       | 191.4       |
| M109      | M109       | V33       | 305.1       |
| M109      | M109       | L89       | 220.8       |
| M109      | M109       | M112      | 677.6       |
| M109      | M109       | I149      | 178.1       |
| M109      | M109       | L174      | 248.1       |
| M109      | M109       | L337      | 83.1        |
| M109      | M112       | L89       | 5712        |
| M109      | M112       | L174      | 5385.8      |
| M109      | L174       | L89       | 5174.4      |
| M109      | L174       | M112      | 3868.3      |
| M112      | V16        | L78       | 4030.3      |
| M112      | V26        | L77       | 4877.8      |
| M112      | V26        | I149      | 5299.5      |
| M112      | V26        | L337      | 6003.3      |
| M112      | V53        | V161      | 5223.1      |
| M112      | V53        | M219      | 8665.5      |
| M112      | L77        | V26       | 4693.6      |
| M112      | L77        | L78       | 5466        |
| M112      | L77        | M81       | 4931.8      |
| M112      | L77        | V86       | 4181.5      |
| M112      | L77        | L89       | 3962.3      |
| M112      | L77        | L174      | 4146.4      |
| M112      | L77        | L337      | 4890.3      |
| M112      | L78        | V16       | 4195.6      |
| M112      | L78        | L77       | 4393.1      |
| M112      | L78        | M81       | 4225.8      |
| M112      | L78        | L174      | 3227.8      |
| M112      | L78        | L337      | 5512.8      |
| M112      | M81        | L77       | 5244.5      |
| M112      | M81        | L78       | 5591.1      |
| M112      | V86        | L77       | 5011        |
| M112      | L89        | L77       | 8359.1      |
| M112      | L89        | L174      | 5546.1      |
| M112      | M112       | V16       | 220.8       |
| M112      | M112       | V26       | 562.2       |

| First Res | Second Res | Third Res | Scaled Flow |
|-----------|------------|-----------|-------------|
| M112      | M112       | V53       | 1373.2      |
| M112      | M112       | L77       | 500.6       |
| M112      | M112       | L78       | 254.1       |
| M112      | M112       | M81       | 598.6       |
| M112      | M112       | V86       | 813.3       |
| M112      | M112       | I87       | 1912.2      |
| M112      | M112       | L89       | 2366.9      |
| M112      | M112       | M109      | 677.6       |
| M112      | M112       | L116      | 1452.5      |
| M112      | M112       | I149      | 76.6        |
| M112      | M112       | V161      | 916.4       |
| M112      | M112       | L167      | 334         |
| M112      | M112       | I169      | 167.3       |
| M112      | M112       | L174      | 2040.3      |
| M112      | M112       | M219      | 87.4        |
| M112      | M112       | L337      | 142.7       |
| M112      | L116       | M219      | 7957.9      |
| M112      | I149       | V26       | 3010.3      |
| M112      | V161       | V53       | 4319.4      |
| M112      | V161       | M219      | 6655.6      |
| M112      | L174       | L77       | 7943        |
| M112      | L174       | L78       | 7693.3      |
| M112      | L174       | L89       | 5036        |
| M112      | M219       | V53       | 3470.7      |
| M112      | M219       | L116      | 3095.4      |
| M112      | M219       | V161      | 3223.4      |
| M112      | L337       | V26       | 3965.8      |
| M112      | L337       | L77       | 3357.4      |
| M112      | L337       | L78       | 4709        |
| L116      | V53        | V161      | 5471.8      |
| L116      | V53        | M219      | 4516.8      |
| L116      | L77        | M81       | 4509.3      |
| L116      | L77        | V86       | 4222.4      |
| L116      | L77        | L89       | 4434.1      |
| L116      | L77        | L174      | 4826.1      |
| L116      | M81        | L77       | 5401.2      |
| L116      | M81        | L174      | 4485.8      |
| L116      | V86        | L77       | 4745.2      |
| L116      | V86        | I87       | 3929.4      |
| L116      | I87        | V86       | 4574.2      |
| L116      | I87        | L89       | 4799        |

| First Res | Second Res | Third Res | Scaled Flow |
|-----------|------------|-----------|-------------|
| L116      | L89        | L77       | 6214.6      |
| L116      | L89        | I87       | 5141.2      |
| L116      | L89        | M112      | 3963.4      |
| L116      | L89        | L174      | 6026.9      |
| L116      | M112       | L89       | 5713.6      |
| L116      | M112       | L174      | 6305.9      |
| L116      | L116       | V53       | 1452.5      |
| L116      | L116       | L77       | 223.3       |
| L116      | L116       | M81       | 407.7       |
| L116      | L116       | V86       | 334         |
| L116      | L116       | I87       | 527.7       |
| L116      | L116       | L89       | 637         |
| L116      | L116       | M112      | 1452.5      |
| L116      | L116       | L125      | 165.5       |
| L116      | L116       | V161      | 813.3       |
| L116      | L116       | L167      | 291.7       |
| L116      | L116       | L174      | 326.6       |
| L116      | L116       | M216      | 105.2       |
| L116      | L116       | M219      | 2095.7      |
| L116      | L125       | M216      | 4480.1      |
| L116      | V161       | V53       | 4179.1      |
| L116      | L174       | L77       | 5400.3      |
| L116      | L174       | M81       | 4190.6      |
| L116      | L174       | L89       | 4811.8      |
| L116      | L174       | M112      | 3492.4      |
| L116      | M216       | L125      | 3994.3      |
| L116      | M219       | V53       | 5610.5      |
| L119      | L119       | V41       | 527.7       |
| M120      | M120       | I130      | 94          |
| M120      | M120       | M137      | 68          |
| M120      | M120       | L159      | 68          |
| M120      | M120       | V361      | 68.8        |
| M120      | M137       | V361      | 3748.1      |
| M120      | V361       | M137      | 3767.7      |
| L125      | L116       | M219      | 4659.4      |
| L125      | L125       | L116      | 165.5       |
| L125      | L125       | M137      | 254.1       |
| L125      | L125       | L167      | 562.2       |
| L125      | L125       | I209      | 527.7       |
| L125      | L125       | I215      | 110.6       |
| L125      | L125       | M216      | 2018        |

| First Res | Second Res | Third Res | Scaled Flow |
|-----------|------------|-----------|-------------|
| L125      | L125       | M219      | 71.5        |
| L125      | L125       | V361      | 239.6       |
| L125      | M137       | V361      | 4101.3      |
| L125      | M219       | L116      | 3803.6      |
| L125      | V361       | M137      | 4043.2      |
| I130      | I130       | M120      | 94          |
| I130      | I130       | L154      | 272.3       |
| I130      | I130       | M216      | 237         |
| I130      | I130       | I238      | 495.1       |
| I130      | I130       | I276      | 237         |
| I130      | I130       | L277      | 1373.2      |
| I130      | I130       | L288      | 272.3       |
| V134      | V134       | V23       | 237         |
| V134      | V134       | I276      | 220.8       |
| V134      | V134       | L277      | 113.7       |
| V134      | V134       | V285      | 1623.2      |
| V134      | I276       | L277      | 4409.4      |
| V134      | L277       | I276      | 3703        |
| M137      | M137       | M120      | 68          |
| M137      | M137       | L125      | 254.1       |
| M137      | M137       | L159      | 220.8       |
| M137      | M137       | L167      | 272.3       |
| M137      | M137       | I215      | 71.5        |
| M137      | M137       | V361      | 1468.6      |
| L141      | L78        | I144      | 3797.4      |
| L141      | L78        | L337      | 5202.4      |
| L141      | L141       | L78       | 142.7       |
| L141      | L141       | I144      | 527.7       |
| L141      | L141       | L167      | 237         |
| L141      | L141       | V285      | 122.7       |
| L141      | L141       | L337      | 70.7        |
| L141      | I144       | L78       | 5619.4      |
| L141      | L337       | L78       | 4391        |
| I144      | V16        | L78       | 2678.2      |
| I144      | V16        | L89       | 3642.2      |
| I144      | V26        | L77       | 3261.5      |
| I144      | V26        | L89       | 4254.9      |
| I144      | V26        | I149      | 4079.8      |
| I144      | V26        | L337      | 3835.4      |
| I144      | L77        | V26       | 8607.9      |
| I144      | L77        | M81       | 5834.7      |

| First Res | Second Res | Third Res | Scaled Flow |
|-----------|------------|-----------|-------------|
| I144      | L77        | V86       | 8201.6      |
| I144      | L77        | L89       | 9224.4      |
| I144      | L77        | L174      | 7800.4      |
| I144      | L78        | V16       | 8563.5      |
| I144      | L78        | L89       | 7325        |
| I144      | L78        | L174      | 6710.6      |
| I144      | L78        | L337      | 7580.6      |
| I144      | M81        | L77       | 4338.8      |
| I144      | V86        | L77       | 3107.6      |
| I144      | V86        | L89       | 3895.7      |
| I144      | L89        | V16       | 4332.8      |
| I144      | L89        | V26       | 4512.8      |
| I144      | L89        | L77       | 3707        |
| I144      | L89        | L78       | 2725.3      |
| I144      | L89        | V86       | 4131.9      |
| I144      | L89        | L174      | 4558.9      |
| I144      | I144       | V16       | 105.2       |
| I144      | I144       | V26       | 165.5       |
| I144      | I144       | L77       | 1986.2      |
| I144      | I144       | L78       | 2245.1      |
| I144      | I144       | M81       | 1157.6      |
| I144      | I144       | V86       | 165.5       |
| I144      | I144       | L89       | 205.7       |
| I144      | I144       | L141      | 527.7       |
| I144      | I144       | I149      | 89.9        |
| I144      | I144       | L167      | 407.7       |
| I144      | I144       | L174      | 516.8       |
| I144      | I144       | V285      | 97.3        |
| I144      | I144       | L337      | 863.5       |
| I144      | I149       | V26       | 3503.3      |
| I144      | L174       | L77       | 4188.4      |
| I144      | L174       | L78       | 3335.9      |
| I144      | L174       | L89       | 6091.3      |
| I144      | L337       | V26       | 6603.5      |
| I144      | L337       | L78       | 4578.3      |
| I149      | V26        | L77       | 5713.5      |
| I149      | V26        | I87       | 6450.1      |
| I149      | V26        | L170      | 5860.8      |
| I149      | V26        | L337      | 7684.3      |
| I149      | L77        | V26       | 4105.2      |
| I149      | L77        | V86       | 4295.6      |

| First Res | Second Res | Third Res | Scaled Flow |
|-----------|------------|-----------|-------------|
| I149      | L77        | L89       | 5194.5      |
| I149      | L77        | I144      | 5823.9      |
| I149      | L77        | L174      | 4999.1      |
| I149      | L77        | L337      | 5096.4      |
| I149      | V86        | L77       | 4855.6      |
| I149      | V86        | I87       | 5239.5      |
| I149      | I87        | V26       | 3529        |
| I149      | I87        | V86       | 3529.6      |
| I149      | I87        | L89       | 4202.4      |
| I149      | I87        | M112      | 4870.2      |
| I149      | L89        | L77       | 5465.7      |
| I149      | L89        | I87       | 5806.9      |
| I149      | L89        | M112      | 6404.2      |
| I149      | L89        | L174      | 5194.8      |
| I149      | M112       | I87       | 3650        |
| I149      | M112       | L89       | 3473.5      |
| I149      | M112       | L174      | 3242.2      |
| I149      | I144       | L77       | 3449.9      |
| I149      | I149       | V26       | 1225.9      |
| I149      | I149       | L77       | 550.7       |
| I149      | I149       | V86       | 765.6       |
| I149      | I149       | I87       | 237         |
| I149      | I149       | L89       | 637         |
| I149      | I149       | M109      | 178.1       |
| I149      | I149       | M112      | 76.6        |
| I149      | I149       | I144      | 89.9        |
| I149      | I149       | L170      | 1030.8      |
| I149      | I149       | L174      | 847.3       |
| I149      | I149       | L337      | 122.7       |
| I149      | L170       | V26       | 5403.2      |
| I149      | L170       | L337      | 6295.2      |
| I149      | L174       | L77       | 5906.9      |
| I149      | L174       | L89       | 5833.7      |
| I149      | L174       | M112      | 6713        |
| I149      | L337       | V26       | 3527        |
| I149      | L337       | L77       | 3255.6      |
| I149      | L337       | L170      | 3134.1      |
| I150      | I150       | M262      | 71.5        |
| L154      | L154       | I130      | 272.3       |
| L154      | L154       | I209      | 178.1       |
| L154      | L154       | M216      | 132.4       |

| First Res | Second Res | Third Res | Scaled Flow |
|-----------|------------|-----------|-------------|
| L154      | L154       | I220      | 527.7       |
| L154      | L154       | L283      | 916.4       |
| L154      | L154       | L288      | 70.7        |
| L154      | L154       | M291      | 1092.6      |
| L154      | L154       | V361      | 68.6        |
| L154      | I220       | L283      | 4714.7      |
| L154      | I220       | M291      | 4343.8      |
| L154      | L283       | I220      | 5847.8      |
| L154      | M291       | I220      | 5827.9      |
| L159      | M137       | V361      | 4578        |
| L159      | L159       | M120      | 68          |
| L159      | L159       | M137      | 220.8       |
| L159      | L159       | L167      | 113.7       |
| L159      | L159       | L287      | 76.6        |
| L159      | L159       | V361      | 68.6        |
| L159      | V361       | M137      | 3422.2      |
| V161      | L77        | V86       | 3557.8      |
| V161      | L77        | L89       | 4894.1      |
| V161      | L77        | L174      | 4496.9      |
| V161      | V86        | L77       | 6186.6      |
| V161      | V86        | I87       | 6014.1      |
| V161      | V86        | L89       | 5631.3      |
| V161      | I87        | V86       | 3214.4      |
| V161      | I87        | L89       | 4432        |
| V161      | I87        | M112      | 3359.7      |
| V161      | L89        | L77       | 4819.1      |
| V161      | L89        | V86       | 3188.9      |
| V161      | L89        | I87       | 4695.8      |
| V161      | L89        | M112      | 3650.7      |
| V161      | L89        | L174      | 4496.6      |
| V161      | M112       | I87       | 6286        |
| V161      | M112       | L89       | 6446.8      |
| V161      | M112       | L174      | 5267.6      |
| V161      | V161       | V53       | 2494.4      |
| V161      | V161       | L77       | 173.6       |
| V161      | V161       | V86       | 916.4       |
| V161      | V161       | I87       | 132.4       |
| V161      | V161       | L89       | 165.5       |
| V161      | V161       | M112      | 916.4       |
| V161      | V161       | L116      | 813.3       |
| V161      | V161       | L167      | 105.2       |

| First Res | Second Res | Third Res | Scaled Flow |
|-----------|------------|-----------|-------------|
| V161      | V161       | I169      | 1204.5      |
| V161      | V161       | L174      | 425.9       |
| V161      | V161       | M219      | 1933.3      |
| V161      | L174       | L77       | 5872.4      |
| V161      | L174       | L89       | 5963.4      |
| V161      | L174       | M112      | 3956        |
| L167      | L77        | L78       | 4295.3      |
| L167      | L77        | M81       | 4868        |
| L167      | L77        | L89       | 5379.6      |
| L167      | L77        | I144      | 4174.5      |
| L167      | L77        | L174      | 4738.1      |
| L167      | L77        | L337      | 4508.8      |
| L167      | L78        | L77       | 5723.7      |
| L167      | L78        | M81       | 5617.7      |
| L167      | L78        | L89       | 5256.1      |
| L167      | L78        | I144      | 5050.1      |
| L167      | L78        | L174      | 4805.4      |
| L167      | L78        | L337      | 7098.7      |
| L167      | M81        | L77       | 4888.5      |
| L167      | M81        | L78       | 4233.5      |
| L167      | M81        | L89       | 4411.8      |
| L167      | M81        | L174      | 3941.6      |
| L167      | I87        | L89       | 4665.1      |
| L167      | I87        | M112      | 3937.1      |
| L167      | L89        | L77       | 4521.7      |
| L167      | L89        | L78       | 3315.4      |
| L167      | L89        | M81       | 3692.7      |
| L167      | L89        | I87       | 4488.2      |
| L167      | L89        | M112      | 4049.9      |
| L167      | L89        | L174      | 4320        |
| L167      | M112       | I87       | 4815.1      |
| L167      | M112       | L89       | 5148.2      |
| L167      | M112       | L116      | 4173.1      |
| L167      | M112       | L174      | 4221.4      |
| L167      | L116       | M112      | 4003.3      |
| L167      | L125       | M216      | 5919.9      |
| L167      | M137       | V361      | 4129.8      |
| L167      | I144       | L77       | 4754        |
| L167      | I144       | L78       | 4316        |
| L167      | V161       | I169      | 3171.4      |
| L167      | L167       | L77       | 266         |

| First Res | Second Res | Third Res | Scaled Flow |
|-----------|------------|-----------|-------------|
| L167      | L167       | L78       | 637         |
| L167      | L167       | M81       | 272.3       |
| L167      | L167       | I87       | 165.5       |
| L167      | L167       | L89       | 142.7       |
| L167      | L167       | M112      | 334         |
| L167      | L167       | L116      | 291.7       |
| L167      | L167       | L125      | 562.2       |
| L167      | L167       | M137      | 272.3       |
| L167      | L167       | L141      | 237         |
| L167      | L167       | I144      | 407.7       |
| L167      | L167       | L159      | 113.7       |
| L167      | L167       | V161      | 105.2       |
| L167      | L167       | I169      | 469.4       |
| L167      | L167       | L174      | 500.6       |
| L167      | L167       | M216      | 83.1        |
| L167      | L167       | L337      | 97.3        |
| L167      | L167       | V361      | 248.1       |
| L167      | I169       | V161      | 4875.1      |
| L167      | L174       | L77       | 5800.8      |
| L167      | L174       | L78       | 4415        |
| L167      | L174       | M81       | 4805.4      |
| L167      | L174       | L89       | 6292.5      |
| L167      | L174       | M112      | 4837        |
| L167      | M216       | L125      | 3425.9      |
| L167      | L337       | L77       | 3446.5      |
| L167      | L337       | L78       | 4072.1      |
| L167      | V361       | M137      | 4029.8      |
| I169      | V53        | M112      | 3761.1      |
| I169      | V53        | V161      | 3444.6      |
| I169      | M112       | V53       | 4062.4      |
| I169      | M112       | L174      | 4345.4      |
| I169      | V161       | V53       | 7420.5      |
| I169      | I169       | V53       | 124.1       |
| I169      | I169       | V86       | 248.1       |
| I169      | I169       | M112      | 167.3       |
| I169      | I169       | V161      | 1204.5      |
| I169      | I169       | L167      | 469.4       |
| I169      | I169       | L174      | 151.4       |
| I169      | I169       | I215      | 76.8        |
| I169      | I169       | L283      | 87.4        |
| I169      | I169       | L337      | 110.6       |



| First Res | Second Res | Third Res | Scaled Flow |
|-----------|------------|-----------|-------------|
| L169      | L174       | M112      | 4244.5      |
| L170      | V16        | V26       | 2032.3      |
| L170      | V16        | L78       | 3549.5      |
| L170      | V16        | L89       | 3299.2      |
| L170      | V26        | V16       | 11273.9     |
| L170      | V26        | L77       | 10652.9     |
| L170      | V26        | L89       | 10169       |
| L170      | V26        | L174      | 11075.9     |
| L170      | L77        | V26       | 2948.9      |
| L170      | L77        | L78       | 5312.7      |
| L170      | L77        | V86       | 4004.8      |
| L170      | L77        | L89       | 5217.6      |
| L170      | L77        | L174      | 5897.5      |
| L170      | L78        | V16       | 4461.8      |
| L170      | L78        | L77       | 4349.1      |
| L170      | L78        | L89       | 3725.1      |
| L170      | L78        | L174      | 4586.7      |
| L170      | L78        | L337      | 3978.7      |
| L170      | V86        | L77       | 5294.3      |
| L170      | I87        | L89       | 6073.9      |
| L170      | L89        | V16       | 4981.3      |
| L170      | L89        | V26       | 2767.8      |
| L170      | L89        | L77       | 5130.3      |
| L170      | L89        | L78       | 4474.2      |
| L170      | L89        | I87       | 4186.9      |
| L170      | L89        | L174      | 5881.4      |
| L170      | L170       | V16       | 76.6        |
| L170      | L170       | V26       | 3940.5      |
| L170      | L170       | L75       | 83.1        |
| L170      | L170       | L77       | 373.3       |
| L170      | L170       | L78       | 191.4       |
| L170      | L170       | V86       | 813.3       |
| L170      | L170       | I87       | 972.2       |
| L170      | L170       | L89       | 357.2       |
| L170      | L170       | I149      | 1030.8      |
| L170      | L170       | L174      | 124.1       |
| L170      | L170       | L337      | 1623.2      |
| L170      | L174       | V26       | 2247.3      |
| L170      | L174       | L77       | 4322.8      |
| L170      | L174       | L78       | 4106.9      |
| L170      | L174       | L89       | 4384.3      |

| First Res | Second Res | Third Res | Scaled Flow |
|-----------|------------|-----------|-------------|
| L170      | L337       | L78       | 8936.3      |
| L174      | V26        | L170      | 8520        |
| L174      | V26        | L337      | 5411.6      |
| L174      | V53        | L116      | 3937.7      |
| L174      | V53        | V161      | 4370.5      |
| L174      | L78        | I144      | 6724        |
| L174      | L78        | L337      | 7431.6      |
| L174      | I87        | L89       | 3199.6      |
| L174      | L89        | I87       | 8670.3      |
| L174      | L116       | V53       | 4232.1      |
| L174      | I144       | L78       | 3428.6      |
| L174      | V161       | V53       | 5115.6      |
| L174      | L170       | V26       | 3845.8      |
| L174      | L170       | L337      | 3215        |
| L174      | L174       | V16       | 847.3       |
| L174      | L174       | V26       | 1275.3      |
| L174      | L174       | V33       | 157.2       |
| L174      | L174       | V53       | 256.9       |
| L174      | L174       | L77       | 3647.1      |
| L174      | L174       | L78       | 2152.5      |
| L174      | L174       | M81       | 1782        |
| L174      | L174       | V86       | 982.9       |
| L174      | L174       | I87       | 751         |
| L174      | L174       | L89       | 3791.5      |
| L174      | L174       | M109      | 248.1       |
| L174      | L174       | M112      | 2040.3      |
| L174      | L174       | L116      | 326.6       |
| L174      | L174       | I144      | 516.8       |
| L174      | L174       | I149      | 847.3       |
| L174      | L174       | V161      | 425.9       |
| L174      | L174       | L167      | 500.6       |
| L174      | L174       | I169      | 151.4       |
| L174      | L174       | L170      | 124.1       |
| L174      | L174       | L337      | 873.1       |
| L174      | L337       | V26       | 4550.5      |
| L174      | L337       | L78       | 4638        |
| L174      | L337       | L170      | 5989.1      |
| M182      | M182       | V186      | 142.7       |
| M182      | M182       | V187      | 720.4       |
| M182      | V186       | V187      | 3751        |
| M182      | V187       | V186      | 6235.6      |

| First Res | Second Res | Third Res | Scaled Flow |
|-----------|------------|-----------|-------------|
| V186      | V186       | M182      | 142.7       |
| V186      | V186       | V187      | 2494.4      |
| V186      | V186       | V333      | 562.2       |
| V187      | V187       | M182      | 720.4       |
| V187      | V187       | V186      | 2494.4      |
| V187      | V187       | V333      | 464.3       |
| I197      | I197       | L66       | 598.6       |
| I197      | I197       | L198      | 3226.2      |
| I197      | I197       | L225      | 1715        |
| I197      | I197       | I238      | 291.7       |
| I197      | I197       | M239      | 527.7       |
| I197      | I197       | V241      | 2767.5      |
| I197      | I197       | V250      | 863.5       |
| I197      | I197       | L253      | 677.6       |
| I197      | I197       | M262      | 926.6       |
| I197      | I197       | L265      | 4769.8      |
| I197      | I197       | L268      | 2913.6      |
| I197      | I197       | L288      | 1225.9      |
| I197      | I197       | L292      | 1373.2      |
| I197      | I197       | V293      | 1452.5      |
| I197      | I197       | L294      | 1030.8      |
| I197      | L198       | L265      | 6342.9      |
| I197      | L225       | I238      | 7065.4      |
| I197      | L225       | V241      | 4532.7      |
| I197      | L225       | L292      | 5945.8      |
| I197      | I238       | L225      | 3440        |
| I197      | I238       | V241      | 2971.3      |
| I197      | M239       | L294      | 4394.4      |
| I197      | V241       | L225      | 6244.9      |
| I197      | V241       | I238      | 8407.9      |
| I197      | V241       | L292      | 6484.5      |
| I197      | L265       | L198      | 9819.4      |
| I197      | L288       | L292      | 6083.8      |
| I197      | L288       | V293      | 4761.9      |
| I197      | L292       | L225      | 5268.9      |
| I197      | L292       | V241      | 4170.8      |
| I197      | L292       | L288      | 6439.2      |
| I197      | V293       | L288      | 5189.7      |
| I197      | L294       | M239      | 5740.9      |
| L198      | L198       | I197      | 3226.2      |
| L198      | L198       | L225      | 720.4       |

| First Res | Second Res | Third Res | Scaled Flow |
|-----------|------------|-----------|-------------|
| L198      | L198       | I238      | 105.2       |
| L198      | L198       | M239      | 813.3       |
| L198      | L198       | V241      | 1030.8      |
| L198      | L198       | V250      | 132.4       |
| L198      | L198       | L253      | 272.3       |
| L198      | L198       | M262      | 1275.3      |
| L198      | L198       | L265      | 7993.3      |
| L198      | L198       | L268      | 2366.9      |
| L198      | L198       | L288      | 464.3       |
| L198      | L198       | L292      | 916.4       |
| L198      | L198       | V293      | 765.6       |
| L198      | L198       | L294      | 495.1       |
| L198      | L225       | I238      | 6307.7      |
| L198      | L225       | V241      | 5120        |
| L198      | L225       | L288      | 4821.1      |
| L198      | L225       | L292      | 5320.2      |
| L198      | I238       | L225      | 3516.3      |
| L198      | I238       | V241      | 3269.4      |
| L198      | M239       | L253      | 5276.1      |
| L198      | M239       | L294      | 5484.9      |
| L198      | V241       | L225      | 5954.3      |
| L198      | V241       | I238      | 6820.6      |
| L198      | V241       | L292      | 5476.1      |
| L198      | V241       | L294      | 5526.4      |
| L198      | L253       | M239      | 3611.3      |
| L198      | L288       | L225      | 4104.5      |
| L198      | L288       | L292      | 5311.4      |
| L198      | L288       | V293      | 4615.8      |
| L198      | L292       | L225      | 5874.2      |
| L198      | L292       | V241      | 5199.1      |
| L198      | L292       | L288      | 6888.4      |
| L198      | V293       | L288      | 5554.6      |
| L198      | L294       | M239      | 4547        |
| L198      | L294       | V241      | 4136.4      |
| M201      | M201       | L253      | 76.6        |
| I209      | L125       | M216      | 5169.8      |
| I209      | I209       | L125      | 527.7       |
| I209      | I209       | L154      | 178.1       |
| I209      | I209       | I215      | 398.9       |
| I209      | I209       | M216      | 220.8       |
| I209      | I209       | I220      | 562.2       |

| First Res | Second Res | Third Res | Scaled Flow |
|-----------|------------|-----------|-------------|
| I209      | I209       | M262      | 161.3       |
| I209      | I209       | L283      | 165.5       |
| I209      | I209       | L288      | 76.6        |
| I209      | I209       | M291      | 312.2       |
| I209      | I209       | V293      | 464.3       |
| I209      | I209       | L357      | 982.9       |
| I209      | M216       | L125      | 3928.7      |
| I209      | I220       | L283      | 6123.2      |
| I209      | I220       | M291      | 5429.7      |
| I209      | L283       | I220      | 4204.4      |
| I209      | L283       | M291      | 3711.3      |
| I209      | L288       | V293      | 3758.7      |
| I209      | M291       | I220      | 4465.5      |
| I209      | M291       | L283      | 4445.3      |
| I209      | V293       | L288      | 6186.7      |
| V212      | V212       | I220      | 142.7       |
| V212      | V212       | V250      | 83.1        |
| V212      | V212       | L283      | 97.3        |
| V212      | V212       | M291      | 813.3       |
| V212      | I220       | L283      | 4839.5      |
| V212      | I220       | M291      | 3791.7      |
| V212      | L283       | I220      | 4401.1      |
| V212      | L283       | M291      | 3073.5      |
| V212      | M291       | I220      | 6618.3      |
| V212      | M291       | L283      | 5899.2      |
| I215      | I215       | L125      | 110.6       |
| I215      | I215       | M137      | 71.5        |
| I215      | I215       | I169      | 76.8        |
| I215      | I215       | I209      | 398.9       |
| I215      | I215       | M291      | 94.6        |
| M216      | L116       | M219      | 4081.9      |
| M216      | I130       | L277      | 4424        |
| M216      | M216       | L116      | 105.2       |
| M216      | M216       | L125      | 2018        |
| M216      | M216       | I130      | 237         |
| M216      | M216       | L154      | 132.4       |
| M216      | M216       | L167      | 83.1        |
| M216      | M216       | I209      | 220.8       |
| M216      | M216       | M219      | 139         |
| M216      | M216       | L277      | 97.3        |
| M216      | M216       | V361      | 77.5        |

| First Res | Second Res | Third Res | Scaled Flow |
|-----------|------------|-----------|-------------|
| M216      | M219       | L116      | 4387.1      |
| M216      | L277       | I130      | 3506.7      |
| M219      | V53        | M112      | 10474.9     |
| M219      | V86        | L89       | 4091.3      |
| M219      | L89        | V86       | 3720.8      |
| M219      | L89        | M112      | 4271.8      |
| M219      | M112       | V53       | 2397.8      |
| M219      | M112       | L89       | 4192.4      |
| M219      | M112       | L116      | 2635.4      |
| M219      | L116       | M112      | 8415.8      |
| M219      | L125       | M216      | 3821.9      |
| M219      | M216       | L125      | 4486.2      |
| M219      | M219       | V53       | 3180.2      |
| M219      | M219       | V86       | 139         |
| M219      | M219       | L89       | 94.6        |
| M219      | M219       | M112      | 87.4        |
| M219      | M219       | L116      | 2095.7      |
| M219      | M219       | L125      | 71.5        |
| M219      | M219       | V161      | 1933.3      |
| M219      | M219       | M216      | 139         |
| I220      | I220       | L154      | 527.7       |
| I220      | I220       | I209      | 562.2       |
| I220      | I220       | V212      | 142.7       |
| I220      | I220       | L283      | 3226.2      |
| I220      | I220       | L288      | 122.7       |
| I220      | I220       | M291      | 2767.5      |
| I220      | I220       | V293      | 76.6        |
| I220      | I220       | L357      | 155.5       |
| I220      | L288       | V293      | 4698.4      |
| I220      | V293       | L288      | 4197.4      |
| L225      | I197       | L198      | 6542.3      |
| L225      | I197       | L265      | 6911.9      |
| L225      | I197       | L268      | 7882        |
| L225      | L198       | I197      | 4342.2      |
| L225      | L198       | L265      | 6410.1      |
| L225      | L198       | L268      | 5681        |
| L225      | L225       | L66       | 237         |
| L225      | L225       | I197      | 1715        |
| L225      | L225       | L198      | 720.4       |
| L225      | L225       | I238      | 2245.1      |
| L225      | L225       | M239      | 562.2       |

| First Res | Second Res | Third Res | Scaled Flow |
|-----------|------------|-----------|-------------|
| L225      | L225       | V241      | 3750        |
| L225      | L225       | L265      | 1016.1      |
| L225      | L225       | L268      | 254.1       |
| L225      | L225       | I276      | 312.2       |
| L225      | L225       | L277      | 813.3       |
| L225      | L225       | L288      | 1912.2      |
| L225      | L225       | L292      | 3940.5      |
| L225      | L225       | V293      | 972.2       |
| L225      | L225       | L294      | 1811.2      |
| L225      | L225       | L367      | 562.2       |
| L225      | M239       | L294      | 3917.5      |
| L225      | L265       | I197      | 5359.4      |
| L225      | L265       | L198      | 7488.6      |
| L225      | L265       | L268      | 6909.2      |
| L225      | L268       | I197      | 3684.1      |
| L225      | L268       | L198      | 4000.7      |
| L225      | L268       | L265      | 4164.8      |
| L225      | L288       | L292      | 4783.5      |
| L225      | L288       | V293      | 5989.5      |
| L225      | L292       | L288      | 8538.8      |
| L225      | V293       | L288      | 4221.6      |
| L225      | L294       | M239      | 6692.3      |
| I238      | I197       | L198      | 5525.6      |
| I238      | I197       | L225      | 2945.5      |
| I238      | I197       | V241      | 3564.7      |
| I238      | I197       | L265      | 5985.7      |
| I238      | I197       | V293      | 4545.2      |
| I238      | L198       | I197      | 4198.9      |
| I238      | L198       | L265      | 5410.7      |
| I238      | L225       | I197      | 7157        |
| I238      | L225       | V241      | 5467.6      |
| I238      | L225       | L292      | 7191.6      |
| I238      | I238       | I130      | 495.1       |
| I238      | I238       | I197      | 291.7       |
| I238      | I238       | L198      | 105.2       |
| I238      | I238       | L225      | 2245.1      |
| I238      | I238       | M239      | 254.1       |
| I238      | I238       | V241      | 2018        |
| I238      | I238       | L265      | 101.7       |
| I238      | I238       | I276      | 863.5       |
| I238      | I238       | L277      | 1623.2      |

| First Res | Second Res | Third Res | Scaled Flow |
|-----------|------------|-----------|-------------|
| I238      | I238       | L287      | 165.5       |
| I238      | I238       | L288      | 813.3       |
| I238      | I238       | L292      | 972.2       |
| I238      | I238       | V293      | 122.7       |
| I238      | I238       | L294      | 381.7       |
| I238      | M239       | L294      | 4539.2      |
| I238      | V241       | I197      | 8077.4      |
| I238      | V241       | L225      | 5098.9      |
| I238      | V241       | L292      | 6501.2      |
| I238      | V241       | L294      | 7221.5      |
| I238      | L265       | I197      | 4561.6      |
| I238      | L265       | L198      | 5426.2      |
| I238      | L288       | L292      | 5912.4      |
| I238      | L288       | V293      | 6830.5      |
| I238      | L292       | L225      | 4571        |
| I238      | L292       | V241      | 4431        |
| I238      | L292       | L288      | 6379.3      |
| I238      | L292       | V293      | 6558.1      |
| I238      | V293       | I197      | 3587.3      |
| I238      | V293       | L288      | 3766.4      |
| I238      | V293       | L292      | 3351.5      |
| I238      | L294       | M239      | 5141.9      |
| I238      | L294       | V241      | 3465.7      |
| M239      | I197       | L198      | 4815.8      |
| M239      | I197       | V241      | 5051.8      |
| M239      | I197       | L265      | 5478.9      |
| M239      | L198       | I197      | 5680.4      |
| M239      | L198       | L265      | 6979.6      |
| M239      | L225       | I238      | 5287.2      |
| M239      | L225       | V241      | 5565.2      |
| M239      | L225       | L288      | 5428        |
| M239      | L225       | L292      | 5744.2      |
| M239      | I238       | L225      | 4088.9      |
| M239      | I238       | V241      | 4082.9      |
| M239      | I238       | L277      | 4764.7      |
| M239      | M239       | I197      | 527.7       |
| M239      | M239       | L198      | 813.3       |
| M239      | M239       | L225      | 562.2       |
| M239      | M239       | I238      | 254.1       |
| M239      | M239       | V241      | 464.3       |
| M239      | M239       | V250      | 178.1       |

| First Res | Second Res | Third Res | Scaled Flow |
|-----------|------------|-----------|-------------|
| M239      | M239       | L253      | 1715        |
| M239      | M239       | L265      | 708.2       |
| M239      | M239       | L277      | 76.6        |
| M239      | M239       | L288      | 153.8       |
| M239      | M239       | L292      | 407.7       |
| M239      | M239       | V293      | 677.6       |
| M239      | M239       | L294      | 2767.5      |
| M239      | V241       | I197      | 4831.6      |
| M239      | V241       | L225      | 5203.2      |
| M239      | V241       | I238      | 4936        |
| M239      | V241       | L292      | 5301.4      |
| M239      | V241       | L294      | 3241.5      |
| M239      | L265       | I197      | 6181.6      |
| M239      | L265       | L198      | 6676.1      |
| M239      | L277       | I238      | 3499.6      |
| M239      | L277       | L288      | 3661.2      |
| M239      | L288       | L225      | 3655.6      |
| M239      | L288       | L277      | 4340.8      |
| M239      | L288       | L292      | 4811.4      |
| M239      | L288       | V293      | 3968.6      |
| M239      | L292       | L225      | 5141.4      |
| M239      | L292       | V241      | 5075.2      |
| M239      | L292       | L288      | 6394.6      |
| M239      | L292       | V293      | 4137.4      |
| M239      | V293       | L288      | 6318.7      |
| M239      | V293       | L292      | 4956.5      |
| M239      | L294       | V241      | 7903.4      |
| V241      | I197       | L198      | 7039.5      |
| V241      | I197       | L265      | 8231.9      |
| V241      | I197       | L268      | 8439.7      |
| V241      | L198       | I197      | 3943.9      |
| V241      | L198       | L265      | 6954.8      |
| V241      | L198       | L268      | 5526.4      |
| V241      | L225       | L277      | 10152.9     |
| V241      | I238       | L277      | 8723.5      |
| V241      | M239       | L294      | 3593.9      |
| V241      | V241       | L66       | 407.7       |
| V241      | V241       | I197      | 2767.5      |
| V241      | V241       | L198      | 1030.8      |
| V241      | V241       | L225      | 3750        |
| V241      | V241       | I238      | 2018        |

| First Res | Second Res | Third Res | Scaled Flow |
|-----------|------------|-----------|-------------|
| V241      | V241       | M239      | 464.3       |
| V241      | V241       | V250      | 291.7       |
| V241      | V241       | L265      | 1077.4      |
| V241      | V241       | L268      | 495.1       |
| V241      | V241       | I276      | 165.5       |
| V241      | V241       | L277      | 76.6        |
| V241      | V241       | L287      | 122.7       |
| V241      | V241       | L288      | 1030.8      |
| V241      | V241       | L292      | 3393.2      |
| V241      | V241       | V293      | 407.7       |
| V241      | V241       | L294      | 2366.9      |
| V241      | V241       | L367      | 191.4       |
| V241      | L265       | I197      | 4758.1      |
| V241      | L265       | L198      | 7175.3      |
| V241      | L265       | L268      | 6292.4      |
| V241      | L268       | I197      | 3539.1      |
| V241      | L268       | L198      | 4136.4      |
| V241      | L268       | L265      | 4565        |
| V241      | I276       | L277      | 4346.5      |
| V241      | L277       | L225      | 1928.1      |
| V241      | L277       | I238      | 2714.5      |
| V241      | L277       | I276      | 3595.7      |
| V241      | L277       | L288      | 2991.6      |
| V241      | L277       | L292      | 1974.3      |
| V241      | L288       | L277      | 6726.2      |
| V241      | L288       | L292      | 4610.9      |
| V241      | L288       | V293      | 6123.7      |
| V241      | L292       | L277      | 9429.1      |
| V241      | L292       | L288      | 9794.5      |
| V241      | L292       | V293      | 8599.3      |
| V241      | L292       | L367      | 10142       |
| V241      | V293       | L288      | 4291.7      |
| V241      | V293       | L292      | 2837.1      |
| V241      | V293       | L367      | 4788.6      |
| V241      | L294       | M239      | 7803.2      |
| V241      | L367       | L292      | 2669.4      |
| V241      | L367       | V293      | 3820.1      |
| V250      | I197       | L198      | 7063.6      |
| V250      | I197       | V241      | 6083.1      |
| V250      | I197       | L265      | 7682        |
| V250      | I197       | L268      | 6886.9      |

| First Res | Second Res | Third Res | Scaled Flow |
|-----------|------------|-----------|-------------|
| V250      | I197       | V293      | 5608.4      |
| V250      | L198       | I197      | 3872.1      |
| V250      | L198       | L265      | 5533.6      |
| V250      | L198       | L268      | 4371.3      |
| V250      | M239       | L253      | 3970.7      |
| V250      | M239       | L294      | 4631.3      |
| V250      | V241       | I197      | 4145.2      |
| V250      | V241       | L294      | 4893.5      |
| V250      | V250       | I197      | 863.5       |
| V250      | V250       | L198      | 132.4       |
| V250      | V250       | V212      | 83.1        |
| V250      | V250       | M239      | 178.1       |
| V250      | V250       | V241      | 291.7       |
| V250      | V250       | L253      | 272.3       |
| V250      | V250       | L265      | 138.4       |
| V250      | V250       | L268      | 132.4       |
| V250      | V250       | L287      | 178.1       |
| V250      | V250       | M291      | 105.2       |
| V250      | V250       | V293      | 153.8       |
| V250      | V250       | L294      | 178.1       |
| V250      | L253       | M239      | 4475.9      |
| V250      | L265       | I197      | 4306.1      |
| V250      | L265       | L198      | 5658.4      |
| V250      | L265       | L268      | 4767        |
| V250      | L268       | I197      | 3775.3      |
| V250      | L268       | L198      | 4371.3      |
| V250      | L268       | L265      | 4661.9      |
| V250      | V293       | I197      | 3194.9      |
| V250      | L294       | M239      | 4631.3      |
| V250      | L294       | V241      | 4253        |
| L253      | I197       | L198      | 6021.1      |
| L253      | I197       | L265      | 6124.1      |
| L253      | I197       | V293      | 5048.1      |
| L253      | L198       | I197      | 4431.9      |
| L253      | L198       | M262      | 4114        |
| L253      | L198       | L265      | 5719        |
| L253      | M239       | L294      | 6865.7      |
| L253      | L253       | I197      | 677.6       |
| L253      | L253       | L198      | 272.3       |
| L253      | L253       | M201      | 76.6        |
| L253      | L253       | M239      | 1715        |

| First Res | Second Res | Third Res | Scaled Flow |
|-----------|------------|-----------|-------------|
| L253      | L253       | V250      | 272.3       |
| L253      | L253       | M262      | 193.5       |
| L253      | L253       | L265      | 485.3       |
| L253      | L253       | L287      | 83.1        |
| L253      | L253       | V293      | 205.7       |
| L253      | L253       | L294      | 464.3       |
| L253      | M262       | L198      | 3743.3      |
| L253      | M262       | L265      | 4018.2      |
| L253      | L265       | I197      | 5481.9      |
| L253      | L265       | L198      | 6955        |
| L253      | L265       | M262      | 5370.3      |
| L253      | V293       | I197      | 3428.6      |
| L253      | L294       | M239      | 3879.5      |
| M262      | I197       | L198      | 4870.4      |
| M262      | I197       | L265      | 4830.5      |
| M262      | I197       | L268      | 4315.8      |
| M262      | I197       | V293      | 6078        |
| M262      | L198       | I197      | 5646.6      |
| M262      | L198       | L265      | 6280        |
| M262      | M262       | I150      | 71.5        |
| M262      | M262       | I197      | 926.6       |
| M262      | M262       | L198      | 1275.3      |
| M262      | M262       | I209      | 161.3       |
| M262      | M262       | L253      | 193.5       |
| M262      | M262       | L265      | 2310.4      |
| M262      | M262       | L268      | 1733.9      |
| M262      | M262       | V293      | 102.3       |
| M262      | L265       | I197      | 8002.6      |
| M262      | L265       | L198      | 8973.8      |
| M262      | L268       | I197      | 5898.8      |
| M262      | V293       | I197      | 3033.5      |
| L265      | L225       | I238      | 7010.3      |
| L265      | L225       | V241      | 5451.1      |
| L265      | L225       | L288      | 5221.4      |
| L265      | L225       | L292      | 5689.2      |
| L265      | I238       | L225      | 3354.6      |
| L265      | I238       | V241      | 3238.2      |
| L265      | M239       | L294      | 4981.5      |
| L265      | V241       | L225      | 5598.3      |
| L265      | V241       | I238      | 6949.7      |
| L265      | V241       | L292      | 5477.7      |

| First Res | Second Res | Third Res | Scaled Flow |
|-----------|------------|-----------|-------------|
| L265      | V241       | L294      | 5166.6      |
| L265      | L265       | L66       | 173         |
| L265      | L265       | I197      | 4769.8      |
| L265      | L265       | L198      | 7993.3      |
| L265      | L265       | L225      | 1016.1      |
| L265      | L265       | I238      | 101.7       |
| L265      | L265       | M239      | 708.2       |
| L265      | L265       | V241      | 1077.4      |
| L265      | L265       | V250      | 138.4       |
| L265      | L265       | L253      | 485.3       |
| L265      | L265       | M262      | 2310.4      |
| L265      | L265       | L268      | 3371.9      |
| L265      | L265       | L288      | 454.8       |
| L265      | L265       | L292      | 957.8       |
| L265      | L265       | V293      | 587.6       |
| L265      | L265       | L294      | 708.2       |
| L265      | L288       | L225      | 3820.5      |
| L265      | L288       | L292      | 5255.5      |
| L265      | L288       | V293      | 4802.2      |
| L265      | L292       | L225      | 5542.1      |
| L265      | L292       | V241      | 5195.7      |
| L265      | L292       | L288      | 6996.8      |
| L265      | V293       | L288      | 5256.5      |
| L265      | L294       | M239      | 4981.5      |
| L265      | L294       | V241      | 4324.9      |
| L268      | I197       | L225      | 8419.3      |
| L268      | I197       | V241      | 8495.4      |
| L268      | I197       | L265      | 5249.4      |
| L268      | I197       | L288      | 9484.4      |
| L268      | I197       | L292      | 9382.9      |
| L268      | I197       | V293      | 10169.1     |
| L268      | L198       | L265      | 6681.3      |
| L268      | L225       | I197      | 2741        |
| L268      | L225       | V241      | 4739.9      |
| L268      | L225       | L288      | 4865        |
| L268      | L225       | L292      | 5564.5      |
| L268      | V241       | I197      | 3418.6      |
| L268      | V241       | L225      | 5858.7      |
| L268      | V241       | L292      | 6255.5      |
| L268      | L265       | I197      | 6026.4      |
| L268      | L265       | L198      | 8975.8      |

| First Res | Second Res | Third Res | Scaled Flow |
|-----------|------------|-----------|-------------|
| L268      | L268       | L66       | 272.3       |
| L268      | L268       | I197      | 2913.6      |
| L268      | L268       | L198      | 2366.9      |
| L268      | L268       | L225      | 254.1       |
| L268      | L268       | V241      | 495.1       |
| L268      | L268       | V250      | 132.4       |
| L268      | L268       | M262      | 1733.9      |
| L268      | L268       | L265      | 3371.9      |
| L268      | L268       | L288      | 89.9        |
| L268      | L268       | L292      | 113.7       |
| L268      | L268       | V293      | 83.1        |
| L268      | L288       | I197      | 2354.1      |
| L268      | L288       | L225      | 3709.1      |
| L268      | L288       | L292      | 4859.2      |
| L268      | L288       | V293      | 4428.3      |
| L268      | L292       | I197      | 2464.2      |
| L268      | L292       | L225      | 4488.8      |
| L268      | L292       | V241      | 4082.6      |
| L268      | L292       | L288      | 5141.5      |
| L268      | L292       | V293      | 4282.4      |
| L268      | V293       | I197      | 2477.3      |
| L268      | V293       | L288      | 4346.4      |
| L268      | V293       | L292      | 3972.4      |
| I276      | L225       | I238      | 3940.8      |
| I276      | L225       | V241      | 5551.5      |
| I276      | L225       | L288      | 4672.9      |
| I276      | L225       | L292      | 5294.2      |
| I276      | L225       | L294      | 4770.8      |
| I276      | I238       | L225      | 5664.7      |
| I276      | I238       | V241      | 6073.4      |
| I276      | V241       | L225      | 4634.9      |
| I276      | V241       | I238      | 3527.5      |
| I276      | V241       | L292      | 4563        |
| I276      | V241       | L294      | 4511.1      |
| I276      | I276       | V23       | 527.7       |
| I276      | I276       | L66       | 70.7        |
| I276      | I276       | I130      | 237         |
| I276      | I276       | V134      | 220.8       |
| I276      | I276       | L225      | 312.2       |
| I276      | I276       | I238      | 863.5       |
| I276      | I276       | V241      | 165.5       |

| First Res | Second Res | Third Res | Scaled Flow |
|-----------|------------|-----------|-------------|
| I276      | I276       | L277      | 1535.8      |
| I276      | I276       | L288      | 191.4       |
| I276      | I276       | L292      | 291.7       |
| I276      | I276       | L294      | 142.7       |
| I276      | L277       | L288      | 6646.2      |
| I276      | L288       | L225      | 4056.9      |
| I276      | L288       | L277      | 3050.8      |
| I276      | L288       | L292      | 5156.6      |
| I276      | L292       | L225      | 5185.9      |
| I276      | L292       | V241      | 5353.6      |
| I276      | L292       | L288      | 5818        |
| I276      | L294       | L225      | 3832.1      |
| I276      | L294       | V241      | 4340.1      |
| L277      | L225       | V241      | 7639.1      |
| L277      | L225       | L292      | 5584.3      |
| L277      | I238       | V241      | 8404.3      |
| L277      | V241       | L225      | 3763.1      |
| L277      | V241       | I238      | 2976.7      |
| L277      | V241       | L288      | 2467.3      |
| L277      | V241       | L292      | 3678.2      |
| L277      | L277       | V23       | 205.7       |
| L277      | L277       | I130      | 1373.2      |
| L277      | L277       | V134      | 113.7       |
| L277      | L277       | M216      | 97.3        |
| L277      | L277       | L225      | 813.3       |
| L277      | L277       | I238      | 1623.2      |
| L277      | L277       | M239      | 76.6        |
| L277      | L277       | V241      | 76.6        |
| L277      | L277       | I276      | 1535.8      |
| L277      | L277       | L288      | 1623.2      |
| L277      | L277       | L292      | 813.3       |
| L277      | L277       | V293      | 312.2       |
| L277      | L277       | L367      | 291.7       |
| L277      | L288       | V241      | 6966.1      |
| L277      | L288       | L292      | 7435        |
| L277      | L288       | V293      | 7429        |
| L277      | L292       | L225      | 5584.3      |
| L277      | L292       | V241      | 7466.8      |
| L277      | L292       | L288      | 5345.7      |
| L277      | L292       | V293      | 5408.7      |
| L277      | L292       | L367      | 5299.3      |

| First Res | Second Res | Third Res | Scaled Flow |
|-----------|------------|-----------|-------------|
| L277      | V293       | L288      | 3809.7      |
| L277      | V293       | L292      | 3857.7      |
| L277      | V293       | L367      | 4310.9      |
| L277      | L367       | L292      | 3702.3      |
| L277      | L367       | V293      | 4222.6      |
| L283      | L283       | L154      | 916.4       |
| L283      | L283       | I169      | 87.4        |
| L283      | L283       | I209      | 165.5       |
| L283      | L283       | V212      | 97.3        |
| L283      | L283       | I220      | 3226.2      |
| L283      | L283       | L288      | 381.7       |
| L283      | L283       | M291      | 1452.5      |
| L283      | L283       | V293      | 76.6        |
| L283      | L288       | V293      | 5903.8      |
| L283      | V293       | L288      | 3828        |
| V285      | L78        | M81       | 5585.7      |
| V285      | L78        | I144      | 5872.3      |
| V285      | L78        | L337      | 5535.1      |
| V285      | M81        | L78       | 4161.2      |
| V285      | M81        | I144      | 4148.6      |
| V285      | I144       | L78       | 3608.8      |
| V285      | I144       | M81       | 3422.3      |
| V285      | V285       | L78       | 527.7       |
| V285      | V285       | M81       | 205.7       |
| V285      | V285       | L90       | 133.9       |
| V285      | V285       | V134      | 1623.2      |
| V285      | V285       | L141      | 122.7       |
| V285      | V285       | I144      | 97.3        |
| V285      | V285       | L337      | 527.7       |
| V285      | L337       | L78       | 5535.1      |
| L287      | I238       | V241      | 4418.7      |
| L287      | V241       | I238      | 4091.6      |
| L287      | V241       | L288      | 3795.6      |
| L287      | V241       | L292      | 4649        |
| L287      | L287       | L159      | 76.6        |
| L287      | L287       | I238      | 165.5       |
| L287      | L287       | V241      | 122.7       |
| L287      | L287       | V250      | 178.1       |
| L287      | L287       | L253      | 83.1        |
| L287      | L287       | L288      | 76.6        |
| L287      | L287       | L292      | 132.4       |



| First Res | Second Res | Third Res | Scaled Flow |
|-----------|------------|-----------|-------------|
| L287      | L287       | V293      | 220.8       |
| L287      | L287       | L367      | 76.6        |
| L287      | L288       | V241      | 3390.9      |
| L287      | L288       | L292      | 4683.7      |
| L287      | L288       | V293      | 4012.7      |
| L287      | L288       | L367      | 3402.1      |
| L287      | L292       | V241      | 4738.5      |
| L287      | L292       | L288      | 5343.6      |
| L287      | L292       | V293      | 4028.6      |
| L287      | L292       | L367      | 4326.6      |
| L287      | V293       | L288      | 5248        |
| L287      | V293       | L292      | 4618.1      |
| L287      | V293       | L367      | 4692.8      |
| L287      | L367       | L288      | 3402.1      |
| L287      | L367       | L292      | 3792.3      |
| L287      | L367       | V293      | 3588.2      |
| L288      | L154       | M291      | 3080.1      |
| L288      | I197       | L198      | 6481.9      |
| L288      | I197       | V241      | 5136.2      |
| L288      | I197       | L265      | 7286.2      |
| L288      | I197       | L268      | 8106.4      |
| L288      | L198       | I197      | 4374.8      |
| L288      | L198       | L265      | 6441.6      |
| L288      | L198       | L268      | 5812        |
| L288      | I220       | L283      | 4190.3      |
| L288      | I220       | M291      | 4102.6      |
| L288      | L225       | V241      | 6541.7      |
| L288      | L225       | L294      | 8020.3      |
| L288      | M239       | L294      | 4635        |
| L288      | V241       | I197      | 4735.1      |
| L288      | V241       | L225      | 4733.1      |
| L288      | V241       | L292      | 3105.4      |
| L288      | V241       | L294      | 6891.4      |
| L288      | L265       | I197      | 4937.5      |
| L288      | L265       | L198      | 6467.7      |
| L288      | L265       | L268      | 6295.4      |
| L288      | L268       | I197      | 3450.3      |
| L288      | L268       | L198      | 3665.3      |
| L288      | L268       | L265      | 3954.1      |
| L288      | I276       | L277      | 2964.9      |
| L288      | L277       | I276      | 6659.3      |

| First Res | Second Res | Third Res | Scaled Flow |
|-----------|------------|-----------|-------------|
| L288      | L283       | I220      | 5773.6      |
| L288      | L288       | L66       | 153.8       |
| L288      | L288       | I130      | 272.3       |
| L288      | L288       | L154      | 70.7        |
| L288      | L288       | I197      | 1225.9      |
| L288      | L288       | L198      | 464.3       |
| L288      | L288       | I209      | 76.6        |
| L288      | L288       | I220      | 122.7       |
| L288      | L288       | L225      | 1912.2      |
| L288      | L288       | I238      | 813.3       |
| L288      | L288       | M239      | 153.8       |
| L288      | L288       | V241      | 1030.8      |
| L288      | L288       | L265      | 454.8       |
| L288      | L288       | L268      | 89.9        |
| L288      | L288       | I276      | 191.4       |
| L288      | L288       | L277      | 1623.2      |
| L288      | L288       | L283      | 381.7       |
| L288      | L288       | L287      | 76.6        |
| L288      | L288       | M291      | 334         |
| L288      | L288       | L292      | 5271.1      |
| L288      | L288       | V293      | 2913.6      |
| L288      | L288       | L294      | 132.4       |
| L288      | L288       | L367      | 863.5       |
| L288      | M291       | L154      | 4639        |
| L288      | M291       | I220      | 5418.5      |
| L288      | L292       | V241      | 11156       |
| L288      | L292       | L294      | 12395.6     |
| L288      | L294       | L225      | 2944.6      |
| L288      | L294       | M239      | 4460.2      |
| L288      | L294       | V241      | 3497        |
| L288      | L294       | L292      | 1750.9      |
| M291      | L288       | V293      | 5481.3      |
| M291      | M291       | L30       | 70.7        |
| M291      | M291       | L154      | 1092.6      |
| M291      | M291       | I209      | 312.2       |
| M291      | M291       | V212      | 813.3       |
| M291      | M291       | I215      | 94.6        |
| M291      | M291       | I220      | 2767.5      |
| M291      | M291       | V250      | 105.2       |
| M291      | M291       | L283      | 1452.5      |
| M291      | M291       | L288      | 334         |

| First Res | Second Res | Third Res | Scaled Flow |
|-----------|------------|-----------|-------------|
| M291      | M291       | V293      | 122.7       |
| M291      | M291       | L357      | 133.9       |
| M291      | V293       | L288      | 4150.1      |
| L292      | I197       | L198      | 5771        |
| L292      | I197       | L265      | 6538        |
| L292      | I197       | L268      | 8201.9      |
| L292      | L198       | I197      | 4772.5      |
| L292      | L198       | L265      | 6873.9      |
| L292      | L198       | L268      | 6782.8      |
| L292      | M239       | L294      | 4359.3      |
| L292      | L265       | I197      | 5572.8      |
| L292      | L265       | L198      | 7085.1      |
| L292      | L265       | L268      | 7551.6      |
| L292      | L268       | I197      | 3489.8      |
| L292      | L268       | L198      | 3489.8      |
| L292      | L268       | L265      | 3769.6      |
| L292      | L292       | L66       | 495.1       |
| L292      | L292       | I197      | 1373.2      |
| L292      | L292       | L198      | 916.4       |
| L292      | L292       | L225      | 3940.5      |
| L292      | L292       | I238      | 972.2       |
| L292      | L292       | M239      | 407.7       |
| L292      | L292       | V241      | 3393.2      |
| L292      | L292       | L265      | 957.8       |
| L292      | L292       | L268      | 113.7       |
| L292      | L292       | I276      | 291.7       |
| L292      | L292       | L277      | 813.3       |
| L292      | L292       | L287      | 132.4       |
| L292      | L292       | L288      | 5271.1      |
| L292      | L292       | V293      | 2018        |
| L292      | L292       | L294      | 863.5       |
| L292      | L292       | L367      | 1811.2      |
| L292      | L294       | M239      | 5757.9      |
| V293      | I197       | L198      | 6124.5      |
| V293      | I197       | V241      | 6672.5      |
| V293      | I197       | L265      | 7357.5      |
| V293      | I197       | L268      | 8735.5      |
| V293      | L198       | I197      | 4564.1      |
| V293      | L198       | M262      | 5562.4      |
| V293      | L198       | L265      | 7053.2      |
| V293      | L198       | L268      | 6681.8      |

| First Res | Second Res | Third Res | Scaled Flow |
|-----------|------------|-----------|-------------|
| V293      | I220       | L283      | 4420.8      |
| V293      | I220       | M291      | 4154.9      |
| V293      | L225       | I238      | 6744.1      |
| V293      | L225       | V241      | 6492.7      |
| V293      | L225       | L292      | 4709.9      |
| V293      | L225       | L294      | 5399.5      |
| V293      | I238       | L225      | 3446.6      |
| V293      | I238       | V241      | 3735.3      |
| V293      | I238       | L277      | 3654.9      |
| V293      | M239       | L253      | 5288.5      |
| V293      | M239       | L294      | 5609        |
| V293      | V241       | I197      | 3955.8      |
| V293      | V241       | L225      | 4671        |
| V293      | V241       | I238      | 5258.3      |
| V293      | V241       | L292      | 3954.4      |
| V293      | V241       | L294      | 4831.2      |
| V293      | L253       | M239      | 3591.8      |
| V293      | M262       | L198      | 3014.5      |
| V293      | M262       | L265      | 3598.4      |
| V293      | M262       | L268      | 4086.2      |
| V293      | L265       | I197      | 5007.6      |
| V293      | L265       | L198      | 6441.6      |
| V293      | L265       | M262      | 6064.2      |
| V293      | L265       | L268      | 6774.1      |
| V293      | L268       | I197      | 3348.4      |
| V293      | L268       | L198      | 3436.8      |
| V293      | L268       | M262      | 3878.3      |
| V293      | L268       | L265      | 3815.1      |
| V293      | L277       | I238      | 4727.6      |
| V293      | L283       | I220      | 4420.8      |
| V293      | L283       | M291      | 3645.6      |
| V293      | L288       | L292      | 7151.3      |
| V293      | M291       | I220      | 4650.8      |
| V293      | M291       | L283      | 4080.7      |
| V293      | L292       | L225      | 6910.4      |
| V293      | L292       | V241      | 8064.6      |
| V293      | L292       | L288      | 5495.4      |
| V293      | V293       | I197      | 1452.5      |
| V293      | V293       | L198      | 765.6       |
| V293      | V293       | I209      | 464.3       |
| V293      | V293       | I220      | 76.6        |

| First Res | Second Res | Third Res | Scaled Flow |
|-----------|------------|-----------|-------------|
| V293      | V293       | L225      | 972.2       |
| V293      | V293       | I238      | 122.7       |
| V293      | V293       | M239      | 677.6       |
| V293      | V293       | V241      | 407.7       |
| V293      | V293       | V250      | 153.8       |
| V293      | V293       | L253      | 205.7       |
| V293      | V293       | M262      | 102.3       |
| V293      | V293       | L265      | 587.6       |
| V293      | V293       | L268      | 83.1        |
| V293      | V293       | L277      | 312.2       |
| V293      | V293       | L283      | 76.6        |
| V293      | V293       | L287      | 220.8       |
| V293      | V293       | L288      | 2913.6      |
| V293      | V293       | M291      | 122.7       |
| V293      | V293       | L292      | 2018        |
| V293      | V293       | L294      | 334         |
| V293      | V293       | L367      | 1715        |
| V293      | L294       | L225      | 3644.5      |
| V293      | L294       | M239      | 4392.8      |
| V293      | L294       | V241      | 4532.8      |
| L294      | I197       | L198      | 6099.1      |
| L294      | I197       | L265      | 6407.9      |
| L294      | L198       | I197      | 4565        |
| L294      | L198       | L265      | 6194.2      |
| L294      | L225       | I238      | 6800.3      |
| L294      | L225       | V241      | 4880.5      |
| L294      | L225       | L288      | 7964        |
| L294      | L225       | L292      | 6864.2      |
| L294      | I238       | L225      | 3487.3      |
| L294      | I238       | V241      | 3138.8      |
| L294      | V241       | L225      | 5799.5      |
| L294      | V241       | I238      | 7273.1      |
| L294      | V241       | L292      | 7143.1      |
| L294      | L265       | I197      | 5534        |
| L294      | L265       | L198      | 7147.1      |
| L294      | L288       | L225      | 3021.2      |
| L294      | L288       | L292      | 4356.4      |
| L294      | L288       | V293      | 4198.4      |
| L294      | L292       | L225      | 4750.2      |
| L294      | L292       | V241      | 4159.9      |
| L294      | L292       | L288      | 7947.1      |

| First Res | Second Res | Third Res | Scaled Flow |
|-----------|------------|-----------|-------------|
| L294      | L292       | V293      | 5423        |
| L294      | L292       | L367      | 5571.5      |
| L294      | V293       | L288      | 5440.3      |
| L294      | V293       | L292      | 3852.1      |
| L294      | V293       | L367      | 4484.5      |
| L294      | L294       | I197      | 1030.8      |
| L294      | L294       | L198      | 495.1       |
| L294      | L294       | L225      | 1811.2      |
| L294      | L294       | I238      | 381.7       |
| L294      | L294       | M239      | 2767.5      |
| L294      | L294       | V241      | 2366.9      |
| L294      | L294       | V250      | 178.1       |
| L294      | L294       | L253      | 464.3       |
| L294      | L294       | L265      | 708.2       |
| L294      | L294       | I276      | 142.7       |
| L294      | L294       | L288      | 132.4       |
| L294      | L294       | L292      | 863.5       |
| L294      | L294       | V293      | 334         |
| L294      | L294       | L367      | 237         |
| L294      | L367       | L292      | 3571.9      |
| L294      | L367       | V293      | 4047.4      |
| V300      | V300       | V45       | 132.4       |
| V333      | V186       | V187      | 4967.3      |
| V333      | V187       | V186      | 4644.2      |
| V333      | V333       | V186      | 562.2       |
| V333      | V333       | V187      | 464.3       |
| L337      | V26        | L89       | 7417.6      |
| L337      | V26        | I149      | 8615.7      |
| L337      | V26        | L170      | 6560.3      |
| L337      | L77        | M81       | 6205.8      |
| L337      | L77        | V86       | 6459.6      |
| L337      | L77        | L89       | 6786.6      |
| L337      | L77        | L174      | 6079        |
| L337      | L78        | M81       | 9788.1      |
| L337      | M81        | L77       | 4357.2      |
| L337      | M81        | L78       | 3009.8      |
| L337      | V86        | L77       | 3498.2      |
| L337      | V86        | I87       | 3815.5      |
| L337      | I87        | V86       | 4725.9      |
| L337      | I87        | L89       | 5001.2      |
| L337      | I87        | M112      | 5400.2      |

| First Res | Second Res | Third Res | Scaled Flow |
|-----------|------------|-----------|-------------|
| L337      | L89        | V26       | 3110.5      |
| L337      | L89        | L77       | 4451.4      |
| L337      | L89        | I87       | 4890.4      |
| L337      | L89        | M112      | 5608.2      |
| L337      | L89        | L174      | 4926.5      |
| L337      | M112       | I87       | 3649.3      |
| L337      | M112       | L89       | 3875.7      |
| L337      | M112       | L174      | 3466.4      |
| L337      | I149       | V26       | 2403.1      |
| L337      | L170       | V26       | 4615.3      |
| L337      | L174       | L77       | 4967.8      |
| L337      | L174       | L89       | 6138        |
| L337      | L174       | M112      | 6249.5      |
| L337      | L337       | V16       | 813.3       |
| L337      | L337       | V26       | 2767.5      |
| L337      | L337       | L75       | 122.7       |
| L337      | L337       | L77       | 1349.8      |
| L337      | L337       | L78       | 4139.3      |
| L337      | L337       | M81       | 598.6       |
| L337      | L337       | V86       | 272.3       |
| L337      | L337       | I87       | 527.7       |
| L337      | L337       | L89       | 495.1       |
| L337      | L337       | M109      | 83.1        |
| L337      | L337       | M112      | 142.7       |
| L337      | L337       | L141      | 70.7        |
| L337      | L337       | I144      | 863.5       |
| L337      | L337       | I149      | 122.7       |
| L337      | L337       | L167      | 97.3        |
| L337      | L337       | I169      | 110.6       |
| L337      | L337       | L170      | 1623.2      |
| L337      | L337       | L174      | 873.1       |
| L337      | L337       | V285      | 527.7       |
| L357      | I220       | M291      | 4639.6      |
| L357      | M291       | I220      | 4464.2      |
| L357      | L357       | I209      | 982.9       |
| L357      | L357       | I220      | 155.5       |
| L357      | L357       | M291      | 133.9       |
| V361      | L125       | M216      | 4932.7      |
| V361      | M216       | L125      | 3694.6      |
| V361      | V361       | M120      | 68.8        |
| V361      | V361       | L125      | 239.6       |

| First Res | Second Res | Third Res | Scaled Flow |
|-----------|------------|-----------|-------------|
| V361      | V361       | M137      | 1468.6      |
| V361      | V361       | L154      | 68.6        |
| V361      | V361       | L159      | 68.6        |
| V361      | V361       | L167      | 248.1       |
| V361      | V361       | M216      | 77.5        |
| L367      | L225       | V241      | 6243.1      |
| L367      | L225       | L292      | 4440.6      |
| L367      | L225       | L294      | 5040.4      |
| L367      | V241       | L225      | 4457.7      |
| L367      | V241       | L292      | 3700.2      |
| L367      | V241       | L294      | 4400.5      |
| L367      | L288       | L292      | 5280.2      |
| L367      | L288       | V293      | 4285.2      |
| L367      | L292       | L225      | 7585.9      |
| L367      | L292       | V241      | 8852.7      |
| L367      | L292       | L288      | 7630.1      |
| L367      | V293       | L288      | 5997.5      |
| L367      | L294       | L225      | 3820.2      |
| L367      | L294       | V241      | 4671        |
| L367      | L367       | L225      | 562.2       |
| L367      | L367       | V241      | 191.4       |
| L367      | L367       | L277      | 291.7       |
| L367      | L367       | L287      | 76.6        |
| L367      | L367       | L288      | 863.5       |
| L367      | L367       | L292      | 1811.2      |
| L367      | L367       | V293      | 1715        |
| L367      | L367       | L294      | 237         |

**Table S11.** Community membership for +ATP inactive p38y

---

|          |                                                                                                                                     |
|----------|-------------------------------------------------------------------------------------------------------------------------------------|
| module1  | 16, 26, 30, 33, 53, 58, 75, 77, 78, 81, 86, 87, 89, 109, 112, 116, 125, 141, 144, 149, 161, 167, 169, 170, 174, 216, 219, 285, 337  |
| module2  | 23, 66, 120, 130, 134, 154, 197, 198, 209, 216, 220, 225, 238, 239, 241, 265, 268, 276, 277, 283, 287, 288, 291, 292, 293, 294, 367 |
| module3  | 66, 150, 197, 198, 209, 225, 238, 239, 241, 250, 253, 262, 265, 268, 288, 292, 293, 294                                             |
| module4  | 197, 198, 201, 225, 238, 239, 241, 250, 253, 262, 265, 277, 287, 288, 292, 293, 294                                                 |
| module5  | 30, 130, 154, 169, 209, 212, 215, 216, 220, 250, 262, 283, 288, 291, 293, 357, 361                                                  |
| module6  | 53, 77, 86, 87, 89, 112, 116, 161, 167, 169, 174, 215, 219, 283, 337                                                                |
| module7  | 116, 125, 130, 137, 154, 167, 209, 215, 216, 219, 277, 361                                                                          |
| module8  | 120, 125, 130, 137, 154, 159, 167, 215, 216, 287, 361                                                                               |
| module9  | 182, 186, 187, 333                                                                                                                  |
| module10 | 23, 78, 81, 90, 134, 141, 144, 276, 277, 285, 337                                                                                   |
| module11 | 41, 119                                                                                                                             |
| module12 | 23, 45, 300                                                                                                                         |
| module13 | 288, 294                                                                                                                            |
| module14 | 238, 293                                                                                                                            |
| module15 | 55                                                                                                                                  |
| module16 | 66, 292                                                                                                                             |
| module17 | 250, 294                                                                                                                            |
| module18 | 323                                                                                                                                 |
| module19 | 343                                                                                                                                 |

**Table S12.** Methyl 3-residue flow for activated p38γ

| First Res | Second Res | Third Res | Scaled Flow | First Res | Second Res | Third Res | Scaled Flow |
|-----------|------------|-----------|-------------|-----------|------------|-----------|-------------|
| V16       | V16        | L283      | 59.9        | V33       | V33        | V343      | 122.7       |
| V16       | V16        | V343      | 42.6        | V33       | L78        | V26       | 4842.9      |
| V23       | V23        | V41       | 97.3        | V41       | V23        | L119      | 3579.0      |
| V23       | V23        | I55       | 70.7        | V41       | L30        | I55       | 4400.4      |
| V23       | V23        | L119      | 728.4       | V41       | L30        | M112      | 2888.5      |
| V26       | V26        | V33       | 83.1        | V41       | V41        | V23       | 97.3        |
| V26       | V26        | V45       | 46.5        | V41       | V41        | L30       | 55.1        |
| V26       | V26        | L58       | 97.3        | V41       | V41        | I55       | 153.8       |
| V26       | V26        | L77       | 220.8       | V41       | V41        | M81       | 55.1        |
| V26       | V26        | L78       | 2494.4      | V41       | V41        | M112      | 464.3       |
| V26       | V26        | V86       | 972.2       | V41       | V41        | L119      | 41.3        |
| V26       | V26        | L89       | 191.4       | V41       | I55        | L30       | 5617.7      |
| V26       | V26        | L141      | 165.5       | V41       | I55        | M112      | 3996.8      |
| V26       | V26        | I169      | 70.7        | V41       | I55        | L119      | 3935.7      |
| V26       | V26        | L170      | 178.1       | V41       | M112       | L30       | 5119.5      |
| V26       | V26        | L287      | 97.3        | V41       | M112       | I55       | 5548.7      |
| V26       | V26        | V323      | 6979.5      | V41       | L119       | V23       | 2962.0      |
| V26       | V33        | V45       | 3931.0      | V41       | L119       | I55       | 2905.6      |
| V26       | V33        | L141      | 3594.1      | V45       | V26        | L78       | 3988.5      |
| V26       | V45        | V33       | 3454.1      | V45       | V26        | V86       | 3187.2      |
| V26       | L141       | V33       | 4264.5      | V45       | V33        | L141      | 7461.5      |
| V26       | I169       | L170      | 3407.1      | V45       | V45        | V26       | 46.5        |
| V26       | L170       | I169      | 4278.3      | V45       | V45        | V33       | 1373.2      |
| L30       | L30        | V41       | 55.1        | V45       | V45        | L78       | 50.6        |
| L30       | L30        | I55       | 5271.1      | V45       | V45        | V86       | 97.3        |
| L30       | L30        | I87       | 637.0       | V45       | V45        | I87       | 97.3        |
| L30       | L30        | L89       | 191.4       | V45       | V45        | L141      | 59.9        |
| L30       | L30        | M109      | 272.3       | V45       | V45        | L287      | 153.8       |
| L30       | L30        | M112      | 1092.6      | V45       | V45        | V300      | 59.9        |
| L30       | L30        | L119      | 139.0       | V45       | V45        | V343      | 381.7       |
| L30       | L30        | L167      | 495.1       | V45       | L78        | V26       | 4062.5      |
| L30       | L30        | I197      | 122.7       | V45       | L78        | V86       | 3263.3      |
| L30       | I55        | L119      | 11723.1     | V45       | L78        | L141      | 3383.3      |
| L30       | L119       | I55       | 1681.1      | V45       | V86        | V26       | 3765.7      |
| V33       | V26        | L78       | 4002.8      | V45       | V86        | L78       | 3785.4      |
| V33       | V33        | V26       | 83.1        | V45       | L141       | V33       | 2734.4      |
| V33       | V33        | V45       | 1373.2      | V45       | L141       | L78       | 3510.2      |
| V33       | V33        | L78       | 178.1       | V45       | L287       | V343      | 3683.8      |
| V33       | V33        | L141      | 1452.5      | V45       | V343       | L287      | 4791.9      |

| First Res | Second Res | Third Res | Scaled Flow |
|-----------|------------|-----------|-------------|
| V53       | V53        | L116      | 237.0       |
| V53       | V53        | V134      | 49.1        |
| V53       | V53        | V161      | 76.6        |
| V53       | V53        | L167      | 407.7       |
| V53       | V53        | I169      | 65.1        |
| V53       | V53        | V212      | 65.1        |
| V53       | V53        | M219      | 291.7       |
| V53       | V53        | L287      | 178.1       |
| V53       | L116       | M219      | 4061.7      |
| V53       | M219       | L116      | 4317.2      |
| I55       | I55        | V23       | 70.7        |
| I55       | I55        | L30       | 5271.1      |
| I55       | I55        | V41       | 153.8       |
| I55       | I55        | M81       | 142.7       |
| I55       | I55        | I87       | 1715.0      |
| I55       | I55        | L89       | 237.0       |
| I55       | I55        | M109      | 272.3       |
| I55       | I55        | M112      | 2494.4      |
| I55       | I55        | L119      | 797.9       |
| I55       | I55        | L167      | 435.2       |
| I55       | I55        | I197      | 70.7        |
| I55       | M81        | M109      | 3939.5      |
| I55       | M109       | M81       | 4706.7      |
| L58       | V26        | L78       | 4277.3      |
| L58       | V26        | V323      | 5270.4      |
| L58       | L58        | V26       | 97.3        |
| L58       | L58        | L75       | 464.3       |
| L58       | L58        | L77       | 407.7       |
| L58       | L58        | L78       | 105.2       |
| L58       | L58        | M81       | 165.5       |
| L58       | L58        | M109      | 142.7       |
| L58       | L58        | I149      | 89.9        |
| L58       | L58        | L174      | 272.3       |
| L58       | L58        | M182      | 105.2       |
| L58       | L58        | V250      | 220.8       |
| L58       | L58        | L253      | 83.1        |
| L58       | L58        | V323      | 89.9        |
| L58       | L75        | M182      | 5018.1      |
| L58       | L77        | M81       | 5346.5      |
| L58       | L77        | L174      | 4363.8      |
| L58       | L78        | V26       | 4358.6      |

| First Res | Second Res | Third Res | Scaled Flow |
|-----------|------------|-----------|-------------|
| L58       | L78        | V323      | 3744.0      |
| L58       | M81        | L77       | 4101.5      |
| L58       | M81        | M109      | 4305.9      |
| L58       | M109       | M81       | 4142.6      |
| L58       | L174       | L77       | 3847.9      |
| L58       | M182       | L75       | 3285.8      |
| L58       | V250       | L253      | 5213.5      |
| L58       | L253       | V250      | 4061.2      |
| L58       | V323       | V26       | 5172.5      |
| L58       | V323       | L78       | 3605.9      |
| L66       | L66        | L89       | 165.5       |
| L66       | L66        | I144      | 178.1       |
| L66       | L66        | L159      | 161.3       |
| L66       | L66        | I169      | 2366.9      |
| L66       | L66        | L170      | 1373.2      |
| L75       | L75        | L58       | 464.3       |
| L75       | L75        | M182      | 1373.2      |
| L75       | L75        | M201      | 191.4       |
| L75       | L75        | V250      | 191.4       |
| L75       | L75        | L253      | 105.2       |
| L75       | L75        | V333      | 89.9        |
| L75       | L75        | L337      | 334.0       |
| L75       | M182       | M201      | 7384.4      |
| L75       | M201       | M182      | 3596.1      |
| L75       | V250       | L253      | 4971.9      |
| L75       | L253       | V250      | 4262.8      |
| L77       | V26        | L78       | 4357.6      |
| L77       | V26        | V86       | 3999.8      |
| L77       | V26        | V323      | 5833.6      |
| L77       | L77        | V26       | 220.8       |
| L77       | L77        | L58       | 407.7       |
| L77       | L77        | L78       | 357.2       |
| L77       | L77        | M81       | 2494.4      |
| L77       | L77        | V86       | 105.2       |
| L77       | L77        | I87       | 291.7       |
| L77       | L77        | M109      | 637.0       |
| L77       | L77        | I144      | 1092.6      |
| L77       | L77        | L170      | 153.8       |
| L77       | L77        | L174      | 1452.5      |
| L77       | L77        | M182      | 435.2       |
| L77       | L77        | M201      | 55.1        |

| First Res | Second Res | Third Res | Scaled Flow |
|-----------|------------|-----------|-------------|
| L77       | L77        | V285      | 59.9        |
| L77       | L77        | V323      | 191.4       |
| L77       | L78        | V26       | 5030.6      |
| L77       | L78        | V86       | 4427.8      |
| L77       | L78        | V323      | 4217.9      |
| L77       | V86        | V26       | 3296.1      |
| L77       | V86        | L78       | 3160.6      |
| L77       | M182       | M201      | 6137.8      |
| L77       | M201       | M182      | 3539.9      |
| L77       | V323       | V26       | 5607.0      |
| L77       | V323       | L78       | 3511.6      |
| L78       | V26        | V323      | 9000.2      |
| L78       | V33        | V45       | 4457.1      |
| L78       | V33        | L141      | 3149.6      |
| L78       | V45        | V33       | 3296.9      |
| L78       | L77        | M81       | 4608.1      |
| L78       | L77        | L174      | 4136.2      |
| L78       | L78        | V26       | 2494.4      |
| L78       | L78        | V33       | 178.1       |
| L78       | L78        | V45       | 50.6        |
| L78       | L78        | L58       | 105.2       |
| L78       | L78        | L77       | 357.2       |
| L78       | L78        | M81       | 435.2       |
| L78       | L78        | V86       | 1030.8      |
| L78       | L78        | I87       | 165.5       |
| L78       | L78        | L89       | 598.6       |
| L78       | L78        | M109      | 334.0       |
| L78       | L78        | L141      | 1030.8      |
| L78       | L78        | I149      | 165.5       |
| L78       | L78        | I169      | 165.5       |
| L78       | L78        | L170      | 562.2       |
| L78       | L78        | L174      | 334.0       |
| L78       | L78        | V285      | 495.1       |
| L78       | L78        | L287      | 97.3        |
| L78       | L78        | V323      | 1157.6      |
| L78       | M81        | L77       | 4914.6      |
| L78       | M81        | M109      | 4619.0      |
| L78       | M109       | M81       | 4240.7      |
| L78       | L141       | V33       | 5745.1      |
| L78       | I169       | L170      | 3332.1      |
| L78       | L170       | I169      | 4852.8      |

| First Res | Second Res | Third Res | Scaled Flow |
|-----------|------------|-----------|-------------|
| L78       | L174       | L77       | 4050.0      |
| L78       | V323       | V26       | 5755.0      |
| M81       | I55        | I87       | 3782.7      |
| M81       | I55        | M112      | 4418.5      |
| M81       | M81        | V41       | 55.1        |
| M81       | M81        | I55       | 142.7       |
| M81       | M81        | L58       | 165.5       |
| M81       | M81        | L77       | 2494.4      |
| M81       | M81        | L78       | 435.2       |
| M81       | M81        | I87       | 312.2       |
| M81       | M81        | M109      | 1912.2      |
| M81       | M81        | M112      | 153.8       |
| M81       | M81        | I144      | 813.3       |
| M81       | M81        | I169      | 89.9        |
| M81       | M81        | L170      | 435.2       |
| M81       | M81        | L174      | 972.2       |
| M81       | M81        | V285      | 132.4       |
| M81       | I87        | I55       | 4709.3      |
| M81       | M112       | I55       | 4504.5      |
| M81       | I169       | L170      | 3205.0      |
| M81       | L170       | I169      | 4972.1      |
| V86       | V26        | L78       | 4706.9      |
| V86       | V26        | V323      | 6937.2      |
| V86       | L78        | V26       | 4831.6      |
| V86       | V86        | V26       | 972.2       |
| V86       | V86        | V45       | 97.3        |
| V86       | V86        | L77       | 105.2       |
| V86       | V86        | L78       | 1030.8      |
| V86       | V86        | L141      | 237.0       |
| V86       | V86        | I149      | 105.2       |
| V86       | V86        | V241      | 50.6        |
| V86       | V86        | V323      | 813.3       |
| V86       | V323       | V26       | 6429.4      |
| I87       | L30        | I55       | 5049.2      |
| I87       | I55        | L30       | 7977.1      |
| I87       | I55        | M112      | 6916.0      |
| I87       | L77        | M81       | 4644.1      |
| I87       | M81        | L77       | 4741.1      |
| I87       | M81        | M109      | 4314.2      |
| I87       | I87        | L30       | 637.0       |
| I87       | I87        | V45       | 97.3        |



| First Res | Second Res | Third Res | Scaled Flow |
|-----------|------------|-----------|-------------|
| I87       | I87        | I55       | 1715.0      |
| I87       | I87        | L77       | 291.7       |
| I87       | I87        | L78       | 165.5       |
| I87       | I87        | M81       | 312.2       |
| I87       | I87        | M109      | 357.2       |
| I87       | I87        | M112      | 381.7       |
| I87       | I87        | L119      | 215.5       |
| I87       | I87        | L283      | 65.1        |
| I87       | I87        | V285      | 178.1       |
| I87       | M109       | M81       | 4498.9      |
| I87       | M112       | I55       | 3661.8      |
| L89       | V26        | L78       | 3998.3      |
| L89       | L30        | I55       | 5254.3      |
| L89       | L30        | M112      | 4271.8      |
| L89       | I55        | L30       | 5577.2      |
| L89       | I55        | M112      | 5295.3      |
| L89       | L66        | I169      | 4449.7      |
| L89       | L66        | L170      | 3782.9      |
| L89       | L78        | V26       | 5729.7      |
| L89       | L89        | V26       | 191.4       |
| L89       | L89        | L30       | 191.4       |
| L89       | L89        | I55       | 237.0       |
| L89       | L89        | L66       | 165.5       |
| L89       | L89        | L78       | 598.6       |
| L89       | L89        | M109      | 312.2       |
| L89       | L89        | M112      | 55.1        |
| L89       | L89        | L159      | 173.6       |
| L89       | L89        | L167      | 42.6        |
| L89       | L89        | I169      | 165.5       |
| L89       | L89        | L170      | 237.0       |
| L89       | L89        | I215      | 178.1       |
| L89       | M112       | L30       | 3156.0      |
| L89       | M112       | I55       | 3685.6      |
| L89       | I169       | L66       | 4449.7      |
| L89       | I169       | L170      | 3731.6      |
| L89       | L170       | L66       | 4175.6      |
| L89       | L170       | I169      | 4119.0      |
| L90       | L90        | L174      | 74.4        |
| L90       | L90        | M201      | 119.4       |
| M109      | L30        | I55       | 5547.9      |
| M109      | L30        | M112      | 4680.7      |

| First Res | Second Res | Third Res | Scaled Flow |
|-----------|------------|-----------|-------------|
| M109      | I55        | L30       | 5547.9      |
| M109      | I55        | I87       | 4100.0      |
| M109      | I55        | M112      | 5565.4      |
| M109      | L77        | M81       | 3764.3      |
| M109      | M81        | L77       | 6344.6      |
| M109      | I87        | I55       | 4455.2      |
| M109      | M109       | L30       | 272.3       |
| M109      | M109       | I55       | 272.3       |
| M109      | M109       | L58       | 142.7       |
| M109      | M109       | L77       | 637.0       |
| M109      | M109       | L78       | 334.0       |
| M109      | M109       | M81       | 1912.2      |
| M109      | M109       | I87       | 357.2       |
| M109      | M109       | L89       | 312.2       |
| M109      | M109       | M112      | 42.6        |
| M109      | M109       | I144      | 407.7       |
| M109      | M109       | L167      | 65.1        |
| M109      | M109       | I169      | 89.9        |
| M109      | M109       | L170      | 122.7       |
| M109      | M109       | L174      | 916.4       |
| M109      | M109       | M182      | 50.6        |
| M109      | M109       | L337      | 464.3       |
| M109      | M112       | L30       | 2960.8      |
| M109      | M112       | I55       | 3520.4      |
| M109      | I169       | L170      | 3645.2      |
| M109      | L170       | I169      | 3930.8      |
| M112      | L30        | I55       | 5095.5      |
| M112      | I55        | L30       | 8187.7      |
| M112      | I55        | I87       | 6973.6      |
| M112      | M81        | M109      | 4700.8      |
| M112      | I87        | I55       | 2898.8      |
| M112      | M109       | M81       | 3484.8      |
| M112      | M112       | L30       | 1092.6      |
| M112      | M112       | V41       | 464.3       |
| M112      | M112       | I55       | 2494.4      |
| M112      | M112       | M81       | 153.8       |
| M112      | M112       | I87       | 381.7       |
| M112      | M112       | L89       | 55.1        |
| M112      | M112       | M109      | 42.6        |
| M112      | M112       | L119      | 139.0       |
| M112      | M112       | V161      | 178.1       |

| First Res | Second Res | Third Res | Scaled Flow |
|-----------|------------|-----------|-------------|
| L116      | L116       | V53       | 237.0       |
| L116      | L116       | L125      | 4346.9      |
| L116      | L116       | M137      | 46.5        |
| L116      | L116       | L159      | 315.7       |
| L116      | L116       | M216      | 97.3        |
| L116      | L116       | M219      | 1623.2      |
| L116      | L116       | L367      | 76.6        |
| L119      | L30        | I55       | 4425.2      |
| L119      | L30        | M112      | 3702.3      |
| L119      | I55        | L30       | 7716.1      |
| L119      | I55        | I87       | 5460.7      |
| L119      | I55        | M112      | 6433.6      |
| L119      | I87        | I55       | 3521.5      |
| L119      | M112       | L30       | 3702.3      |
| L119      | M112       | I55       | 3689.7      |
| L119      | L119       | V23       | 728.4       |
| L119      | L119       | L30       | 139.0       |
| L119      | L119       | V41       | 41.3        |
| L119      | L119       | I55       | 797.9       |
| L119      | L119       | I87       | 215.5       |
| L119      | L119       | M112      | 139.0       |
| L119      | L119       | I197      | 133.9       |
| L119      | L119       | L265      | 41.3        |
| M120      | M120       | L225      | 220.8       |
| M120      | M120       | V241      | 42.6        |
| M120      | M120       | L265      | 55.1        |
| M120      | M120       | L277      | 598.6       |
| M120      | M120       | L292      | 70.7        |
| M120      | L225       | V241      | 4601.0      |
| M120      | L225       | L292      | 4505.2      |
| M120      | V241       | L225      | 3092.0      |
| M120      | V241       | L265      | 3729.9      |
| M120      | V241       | L292      | 3710.6      |
| M120      | L265       | V241      | 3941.2      |
| M120      | L292       | L225      | 3381.4      |
| M120      | L292       | V241      | 4144.2      |
| L125      | L116       | M219      | 9708.4      |
| L125      | L125       | L116      | 4346.9      |
| L125      | L125       | M137      | 46.5        |
| L125      | L125       | L159      | 361.1       |
| L125      | L125       | I169      | 59.9        |

| First Res | Second Res | Third Res | Scaled Flow |
|-----------|------------|-----------|-------------|
| L125      | L125       | M219      | 357.2       |
| L125      | L125       | L367      | 65.1        |
| L125      | M137       | I169      | 3645.7      |
| L125      | I169       | M137      | 3852.6      |
| L125      | M219       | L116      | 2362.8      |
| I130      | I130       | I215      | 110.6       |
| I130      | I130       | M216      | 41.3        |
| I130      | I130       | I220      | 1275.3      |
| I130      | I130       | I238      | 149.8       |
| I130      | I130       | L277      | 440.0       |
| I130      | I130       | V285      | 173.6       |
| I130      | I238       | L277      | 4006.3      |
| I130      | L277       | I238      | 5498.6      |
| V134      | V134       | V53       | 49.1        |
| M137      | L116       | L125      | 4425.9      |
| M137      | L125       | L116      | 4425.9      |
| M137      | M137       | L116      | 46.5        |
| M137      | M137       | L125      | 46.5        |
| M137      | M137       | L141      | 42.6        |
| M137      | M137       | I169      | 1623.2      |
| M137      | M137       | L170      | 97.3        |
| M137      | M137       | I209      | 49.1        |
| M137      | M137       | L283      | 89.9        |
| M137      | M137       | L287      | 357.2       |
| M137      | I169       | L170      | 7159.1      |
| M137      | L170       | I169      | 2681.8      |
| L141      | V26        | L78       | 3640.5      |
| L141      | V26        | V323      | 5701.4      |
| L141      | V33        | V45       | 7510.6      |
| L141      | V45        | V33       | 2673.1      |
| L141      | L78        | V26       | 6771.3      |
| L141      | L78        | V323      | 5722.6      |
| L141      | M137       | I169      | 3429.4      |
| L141      | L141       | V26       | 165.5       |
| L141      | L141       | V33       | 1452.5      |
| L141      | L141       | V45       | 59.9        |
| L141      | L141       | L78       | 1030.8      |
| L141      | L141       | V86       | 237.0       |
| L141      | L141       | M137      | 42.6        |
| L141      | L141       | I149      | 76.6        |
| L141      | L141       | I169      | 122.7       |

| First Res | Second Res | Third Res | Scaled Flow |
|-----------|------------|-----------|-------------|
| L141      | L141       | L170      | 254.1       |
| L141      | L141       | L174      | 191.4       |
| L141      | L141       | L287      | 76.6        |
| L141      | L141       | V323      | 122.7       |
| L141      | L141       | V343      | 76.6        |
| L141      | I169       | M137      | 4367.6      |
| L141      | I169       | L170      | 3547.1      |
| L141      | L170       | I169      | 4314.4      |
| L141      | L287       | V343      | 3869.0      |
| L141      | V323       | V26       | 5279.5      |
| L141      | V323       | L78       | 2849.0      |
| L141      | V343       | L287      | 3869.0      |
| I144      | L66        | I169      | 4632.4      |
| I144      | L66        | L170      | 3951.1      |
| I144      | L77        | M81       | 5111.7      |
| I144      | L77        | L174      | 5469.2      |
| I144      | M81        | L77       | 4494.0      |
| I144      | M81        | M109      | 5070.6      |
| I144      | M109       | M81       | 3936.0      |
| I144      | I144       | L66       | 178.1       |
| I144      | I144       | L77       | 1092.6      |
| I144      | I144       | M81       | 813.3       |
| I144      | I144       | M109      | 407.7       |
| I144      | I144       | I169      | 122.7       |
| I144      | I144       | L170      | 178.1       |
| I144      | I144       | L174      | 254.1       |
| I144      | I144       | M182      | 142.7       |
| I144      | I144       | V361      | 256.9       |
| I144      | I169       | L66       | 4206.8      |
| I144      | I169       | L170      | 3684.1      |
| I144      | L170       | L66       | 3951.1      |
| I144      | L170       | I169      | 4056.9      |
| I144      | L174       | L77       | 3224.9      |
| I149      | L78        | V86       | 3864.4      |
| I149      | L78        | L141      | 3987.3      |
| I149      | V86        | L78       | 3445.4      |
| I149      | L141       | L78       | 3298.5      |
| I149      | I149       | L58       | 89.9        |
| I149      | I149       | L78       | 165.5       |
| I149      | I149       | V86       | 105.2       |
| I149      | I149       | L141      | 76.6        |

| First Res | Second Res | Third Res | Scaled Flow |
|-----------|------------|-----------|-------------|
| I149      | I149       | L337      | 70.7        |
| I149      | I149       | L367      | 334.0       |
| I150      | I150       | L198      | 357.2       |
| I150      | I150       | M239      | 2245.1      |
| I150      | I150       | V241      | 46.5        |
| I150      | I150       | V250      | 165.5       |
| I150      | I150       | L253      | 863.5       |
| I150      | I150       | M262      | 254.1       |
| I150      | I150       | L268      | 105.2       |
| I150      | I150       | M291      | 132.4       |
| I150      | I150       | L292      | 50.6        |
| I150      | L198       | M262      | 6035.6      |
| I150      | M239       | V241      | 9484.6      |
| I150      | V241       | M239      | 2463.8      |
| I150      | V241       | L292      | 3836.5      |
| I150      | V250       | L253      | 3886.7      |
| I150      | L253       | V250      | 6691.8      |
| I150      | M262       | L198      | 5442.6      |
| I150      | L292       | V241      | 3907.7      |
| L154      | L154       | V361      | 215.5       |
| L159      | L66        | I169      | 4181.9      |
| L159      | L66        | L170      | 4388.2      |
| L159      | L116       | L125      | 5302.3      |
| L159      | L116       | M219      | 4230.8      |
| L159      | L125       | L116      | 5529.9      |
| L159      | L159       | L66       | 161.3       |
| L159      | L159       | L89       | 173.6       |
| L159      | L159       | L116      | 315.7       |
| L159      | L159       | L125      | 361.1       |
| L159      | L159       | L167      | 80.7        |
| L159      | L159       | I169      | 294.9       |
| L159      | L159       | L170      | 49.1        |
| L159      | L159       | I215      | 128.9       |
| L159      | L159       | M216      | 167.3       |
| L159      | L159       | M219      | 305.1       |
| L159      | L159       | L287      | 49.1        |
| L159      | I169       | L66       | 4956.4      |
| L159      | I169       | L170      | 4876.0      |
| L159      | L170       | L66       | 3309.8      |
| L159      | L170       | I169      | 3103.1      |
| L159      | M219       | L116      | 4187.1      |

| First Res | Second Res | Third Res | Scaled Flow |
|-----------|------------|-----------|-------------|
| V161      | V161       | V53       | 76.6        |
| V161      | V161       | M112      | 178.1       |
| V161      | V161       | L167      | 65.1        |
| V161      | V161       | V212      | 132.4       |
| V161      | V161       | L283      | 272.3       |
| L167      | L30        | I55       | 5966.2      |
| L167      | I55        | L30       | 5708.9      |
| L167      | L167       | L30       | 495.1       |
| L167      | L167       | V53       | 407.7       |
| L167      | L167       | I55       | 435.2       |
| L167      | L167       | L89       | 42.6        |
| L167      | L167       | M109      | 65.1        |
| L167      | L167       | L159      | 80.7        |
| L167      | L167       | V161      | 65.1        |
| L167      | L167       | I169      | 435.2       |
| L167      | L167       | L287      | 527.7       |
| L167      | L167       | V343      | 142.7       |
| L167      | L167       | V361      | 80.7        |
| L167      | L287       | V343      | 5181.1      |
| L167      | V343       | L287      | 3501.2      |
| I169      | V26        | L78       | 3929.5      |
| I169      | V26        | V323      | 4669.9      |
| I169      | L78        | V26       | 4839.0      |
| I169      | L78        | L141      | 3802.9      |
| I169      | L78        | V323      | 3598.3      |
| I169      | M81        | M109      | 4051.4      |
| I169      | M81        | I144      | 3292.7      |
| I169      | M109       | M81       | 4051.4      |
| I169      | L141       | L78       | 3521.5      |
| I169      | I144       | M81       | 3550.7      |
| I169      | I169       | V26       | 70.7        |
| I169      | I169       | V53       | 65.1        |
| I169      | I169       | L66       | 2366.9      |
| I169      | I169       | L78       | 165.5       |
| I169      | I169       | M81       | 89.9        |
| I169      | I169       | L89       | 165.5       |
| I169      | I169       | M109      | 89.9        |
| I169      | I169       | L125      | 59.9        |
| I169      | I169       | M137      | 1623.2      |
| I169      | I169       | L141      | 122.7       |
| I169      | I169       | I144      | 122.7       |

| First Res | Second Res | Third Res | Scaled Flow |
|-----------|------------|-----------|-------------|
| I169      | I169       | L159      | 294.9       |
| I169      | I169       | L167      | 435.2       |
| I169      | I169       | L170      | 1297.7      |
| I169      | I169       | L287      | 165.5       |
| I169      | I169       | V323      | 254.1       |
| I169      | I169       | V343      | 46.5        |
| I169      | L287       | V343      | 4582.2      |
| I169      | V323       | V26       | 6477.1      |
| I169      | V323       | L78       | 4052.7      |
| I169      | V343       | L287      | 3393.3      |
| L170      | V26        | L78       | 3989.1      |
| L170      | V26        | V323      | 5720.3      |
| L170      | L77        | M81       | 4026.6      |
| L170      | L77        | I144      | 3660.0      |
| L170      | L77        | L174      | 3374.1      |
| L170      | L78        | V26       | 5697.4      |
| L170      | L78        | V323      | 4807.6      |
| L170      | M81        | L77       | 5468.9      |
| L170      | M81        | M109      | 5265.8      |
| L170      | M109       | M81       | 3660.4      |
| L170      | M137       | I169      | 2962.0      |
| L170      | I144       | L77       | 3805.1      |
| L170      | I169       | M137      | 7024.8      |
| L170      | L170       | V26       | 178.1       |
| L170      | L170       | L66       | 1373.2      |
| L170      | L170       | L77       | 153.8       |
| L170      | L170       | L78       | 562.2       |
| L170      | L170       | M81       | 435.2       |
| L170      | L170       | L89       | 237.0       |
| L170      | L170       | M109      | 122.7       |
| L170      | L170       | M137      | 97.3        |
| L170      | L170       | L141      | 254.1       |
| L170      | L170       | I144      | 178.1       |
| L170      | L170       | L159      | 49.1        |
| L170      | L170       | I169      | 1297.7      |
| L170      | L170       | L174      | 598.6       |
| L170      | L170       | V323      | 142.7       |
| L170      | L174       | L77       | 5126.4      |
| L170      | V323       | V26       | 5397.1      |
| L170      | V323       | L78       | 3175.9      |
| L174      | L77        | M81       | 5205.9      |

| First Res | Second Res | Third Res | Scaled Flow |
|-----------|------------|-----------|-------------|
| L174      | M81        | L77       | 4290.0      |
| L174      | L174       | L58       | 272.3       |
| L174      | L174       | L77       | 1452.5      |
| L174      | L174       | L78       | 334.0       |
| L174      | L174       | M81       | 972.2       |
| L174      | L174       | L90       | 74.4        |
| L174      | L174       | M109      | 916.4       |
| L174      | L174       | L141      | 191.4       |
| L174      | L174       | I144      | 254.1       |
| L174      | L174       | L170      | 598.6       |
| L174      | L174       | M182      | 132.4       |
| L174      | L174       | M201      | 312.2       |
| L174      | M182       | M201      | 4129.7      |
| L174      | M201       | M182      | 5240.8      |
| M182      | L77        | I144      | 4489.8      |
| M182      | L77        | L174      | 4877.8      |
| M182      | M109       | L174      | 3106.0      |
| M182      | I144       | L77       | 3242.7      |
| M182      | L174       | L77       | 3456.0      |
| M182      | L174       | M109      | 3886.5      |
| M182      | M182       | L58       | 105.2       |
| M182      | M182       | L75       | 1373.2      |
| M182      | M182       | L77       | 435.2       |
| M182      | M182       | M109      | 50.6        |
| M182      | M182       | I144      | 142.7       |
| M182      | M182       | L174      | 132.4       |
| M182      | M182       | V187      | 142.7       |
| M182      | M182       | M201      | 2627.8      |
| M182      | M182       | V333      | 55.1        |
| M182      | M182       | L337      | 165.5       |
| V186      | V186       | M201      | 105.2       |
| V186      | V186       | M219      | 105.2       |
| V187      | M182       | M201      | 4758.1      |
| V187      | V187       | M182      | 142.7       |
| V187      | V187       | L198      | 464.3       |
| V187      | V187       | M201      | 70.7        |
| V187      | V187       | M262      | 562.2       |
| V187      | L198       | M262      | 5832.0      |
| V187      | M201       | M182      | 4016.0      |
| V187      | M262       | L198      | 6237.7      |
| I197      | L30        | I55       | 5295.9      |

| First Res | Second Res | Third Res | Scaled Flow |
|-----------|------------|-----------|-------------|
| I197      | I55        | L30       | 4644.2      |
| I197      | I55        | L119      | 3142.6      |
| I197      | L119       | I55       | 3672.9      |
| I197      | I197       | L30       | 122.7       |
| I197      | I197       | I55       | 70.7        |
| I197      | I197       | L119      | 133.9       |
| I197      | I197       | M239      | 65.1        |
| I197      | I197       | V250      | 50.6        |
| I197      | I197       | L265      | 142.7       |
| I197      | I197       | L288      | 42.6        |
| I197      | I197       | V293      | 312.2       |
| L198      | I150       | M239      | 5747.6      |
| L198      | L198       | I150      | 357.2       |
| L198      | L198       | V187      | 464.3       |
| L198      | L198       | M239      | 46.5        |
| L198      | L198       | V241      | 89.9        |
| L198      | L198       | V250      | 122.7       |
| L198      | L198       | L253      | 562.2       |
| L198      | L198       | M262      | 5794.6      |
| L198      | L198       | L294      | 50.6        |
| L198      | M239       | I150      | 3407.7      |
| L198      | M239       | V241      | 3434.6      |
| L198      | V241       | M239      | 3982.6      |
| L198      | V241       | L294      | 4046.3      |
| L198      | V250       | L253      | 3930.8      |
| L198      | L253       | V250      | 6182.3      |
| L198      | L294       | V241      | 3554.2      |
| M201      | L75        | M182      | 2565.3      |
| M201      | L77        | L174      | 3209.1      |
| M201      | L174       | L77       | 5003.1      |
| M201      | M182       | L75       | 7869.7      |
| M201      | M201       | L75       | 191.4       |
| M201      | M201       | L77       | 55.1        |
| M201      | M201       | L90       | 119.4       |
| M201      | M201       | L174      | 312.2       |
| M201      | M201       | M182      | 2627.8      |
| M201      | M201       | V186      | 105.2       |
| M201      | M201       | V187      | 70.7        |
| M201      | M201       | V333      | 42.6        |
| I209      | I209       | M137      | 49.1        |
| V212      | V212       | V53       | 65.1        |

| First Res | Second Res | Third Res | Scaled Flow |
|-----------|------------|-----------|-------------|
| V212      | V212       | V161      | 132.4       |
| V212      | V212       | I215      | 165.5       |
| V212      | V212       | L277      | 272.3       |
| V212      | V212       | L283      | 55.1        |
| V212      | V212       | L287      | 122.7       |
| I215      | I215       | L89       | 178.1       |
| I215      | I215       | I130      | 110.6       |
| I215      | I215       | L159      | 128.9       |
| I215      | I215       | V212      | 165.5       |
| I215      | I215       | M219      | 122.7       |
| I215      | I215       | L277      | 42.6        |
| M216      | L116       | M219      | 3716.9      |
| M216      | M216       | L116      | 97.3        |
| M216      | M216       | I130      | 41.3        |
| M216      | M216       | L159      | 167.3       |
| M216      | M216       | M219      | 191.4       |
| M216      | M216       | M291      | 97.3        |
| M216      | M219       | L116      | 4417.5      |
| M219      | L116       | L125      | 8196.8      |
| M219      | L125       | L116      | 4383.4      |
| M219      | M219       | V53       | 291.7       |
| M219      | M219       | L116      | 1623.2      |
| M219      | M219       | L125      | 357.2       |
| M219      | M219       | L159      | 305.1       |
| M219      | M219       | V186      | 105.2       |
| M219      | M219       | I215      | 122.7       |
| M219      | M219       | M216      | 191.4       |
| M219      | M219       | V300      | 65.1        |
| I220      | I220       | I130      | 1275.3      |
| I220      | I220       | I238      | 435.2       |
| I220      | I220       | L277      | 312.2       |
| I220      | I238       | L277      | 5007.0      |
| I220      | L277       | I238      | 4502.0      |
| L225      | L225       | M120      | 220.8       |
| L225      | L225       | I238      | 1092.6      |
| L225      | L225       | M239      | 89.9        |
| L225      | L225       | V241      | 1225.9      |
| L225      | L225       | L265      | 562.2       |
| L225      | L225       | L277      | 637.0       |
| L225      | L225       | L288      | 677.6       |
| L225      | L225       | L292      | 1373.2      |

| First Res | Second Res | Third Res | Scaled Flow |
|-----------|------------|-----------|-------------|
| L225      | L225       | V293      | 637.0       |
| L225      | L225       | L294      | 2366.9      |
| L225      | I238       | L277      | 5408.9      |
| L225      | M239       | V241      | 2833.4      |
| L225      | V241       | M239      | 6657.1      |
| L225      | V241       | L265      | 5207.8      |
| L225      | L265       | V241      | 3759.4      |
| L225      | L265       | L294      | 3432.6      |
| L225      | L277       | I238      | 4319.1      |
| L225      | L288       | L292      | 4452.8      |
| L225      | L292       | L288      | 6088.8      |
| L225      | L294       | L265      | 6968.0      |
| I238      | I130       | I220      | 3400.8      |
| I238      | I220       | I130      | 4637.6      |
| I238      | L225       | L292      | 5594.2      |
| I238      | L225       | L294      | 5459.6      |
| I238      | I238       | I130      | 149.8       |
| I238      | I238       | I220      | 435.2       |
| I238      | I238       | L225      | 1092.6      |
| I238      | I238       | M239      | 122.7       |
| I238      | I238       | V241      | 191.4       |
| I238      | I238       | L265      | 237.0       |
| I238      | I238       | L268      | 407.7       |
| I238      | I238       | L277      | 2494.4      |
| I238      | I238       | L288      | 220.8       |
| I238      | I238       | M291      | 220.8       |
| I238      | I238       | L292      | 205.7       |
| I238      | I238       | V293      | 254.1       |
| I238      | I238       | L294      | 562.2       |
| I238      | M239       | V241      | 3704.2      |
| I238      | V241       | M239      | 4159.8      |
| I238      | V241       | L265      | 4187.1      |
| I238      | V241       | L288      | 4166.3      |
| I238      | V241       | L292      | 4305.6      |
| I238      | V241       | L294      | 3550.6      |
| I238      | L265       | V241      | 4444.5      |
| I238      | L265       | L294      | 4103.4      |
| I238      | L288       | V241      | 4334.7      |
| I238      | L288       | L292      | 4855.4      |
| I238      | L292       | L225      | 3106.2      |
| I238      | L292       | V241      | 4391.4      |

| First Res | Second Res | Third Res | Scaled Flow |
|-----------|------------|-----------|-------------|
| I238      | L292       | L288      | 4759.8      |
| I238      | L294       | L225      | 4162.6      |
| I238      | L294       | V241      | 4972.7      |
| I238      | L294       | L265      | 5414.1      |
| M239      | L198       | M262      | 4537.4      |
| M239      | L225       | I238      | 3513.0      |
| M239      | L225       | V241      | 2696.4      |
| M239      | L225       | L292      | 3126.8      |
| M239      | L225       | L294      | 3616.4      |
| M239      | I238       | L225      | 3788.3      |
| M239      | M239       | I150      | 2245.1      |
| M239      | M239       | I197      | 65.1        |
| M239      | M239       | L198      | 46.5        |
| M239      | M239       | L225      | 89.9        |
| M239      | M239       | I238      | 122.7       |
| M239      | M239       | V241      | 1373.2      |
| M239      | M239       | V250      | 132.4       |
| M239      | M239       | L253      | 237.0       |
| M239      | M239       | M262      | 76.6        |
| M239      | M239       | L265      | 720.4       |
| M239      | M239       | L268      | 765.6       |
| M239      | M239       | L288      | 153.8       |
| M239      | M239       | M291      | 55.1        |
| M239      | M239       | L292      | 598.6       |
| M239      | M239       | V293      | 142.7       |
| M239      | M239       | L294      | 527.7       |
| M239      | V241       | L225      | 6705.3      |
| M239      | V241       | L288      | 6873.9      |
| M239      | V241       | L292      | 5383.3      |
| M239      | V250       | L253      | 4339.4      |
| M239      | L253       | V250      | 5075.0      |
| M239      | M262       | L198      | 5068.7      |
| M239      | L265       | L294      | 5031.2      |
| M239      | L288       | V241      | 3157.3      |
| M239      | L288       | L292      | 4078.6      |
| M239      | L292       | L225      | 5426.4      |
| M239      | L292       | V241      | 3756.8      |
| M239      | L292       | L288      | 6196.9      |
| M239      | L294       | L225      | 5995.9      |
| M239      | L294       | L265      | 4478.6      |
| V241      | I150       | M239      | 2980.5      |

| First Res | Second Res | Third Res | Scaled Flow |
|-----------|------------|-----------|-------------|
| V241      | L198       | M262      | 4947.4      |
| V241      | I238       | L277      | 4649.2      |
| V241      | M239       | I150      | 8594.5      |
| V241      | V241       | V86       | 50.6        |
| V241      | V241       | M120      | 42.6        |
| V241      | V241       | I150      | 46.5        |
| V241      | V241       | L198      | 89.9        |
| V241      | V241       | L225      | 1225.9      |
| V241      | V241       | I238      | 191.4       |
| V241      | V241       | M239      | 1373.2      |
| V241      | V241       | M262      | 113.7       |
| V241      | V241       | L265      | 1912.2      |
| V241      | V241       | L277      | 153.8       |
| V241      | V241       | L288      | 1811.2      |
| V241      | V241       | L292      | 2018.0      |
| V241      | V241       | V293      | 113.7       |
| V241      | V241       | L294      | 1535.8      |
| V241      | M262       | L198      | 5234.8      |
| V241      | L277       | I238      | 4385.0      |
| V250      | I150       | M239      | 4490.6      |
| V250      | L198       | M262      | 5199.1      |
| V250      | M239       | I150      | 4238.3      |
| V250      | V250       | L58       | 220.8       |
| V250      | V250       | L75       | 191.4       |
| V250      | V250       | I150      | 165.5       |
| V250      | V250       | I197      | 50.6        |
| V250      | V250       | L198      | 122.7       |
| V250      | V250       | M239      | 132.4       |
| V250      | V250       | L253      | 2913.6      |
| V250      | V250       | M262      | 122.7       |
| V250      | M262       | L198      | 5199.1      |
| L253      | I150       | M239      | 5924.9      |
| L253      | L198       | M262      | 5924.9      |
| L253      | M239       | I150      | 3798.4      |
| L253      | L253       | L58       | 83.1        |
| L253      | L253       | L75       | 105.2       |
| L253      | L253       | I150      | 863.5       |
| L253      | L253       | L198      | 562.2       |
| L253      | L253       | M239      | 237.0       |
| L253      | L253       | V250      | 2913.6      |
| L253      | L253       | M262      | 677.6       |

| First Res | Second Res | Third Res | Scaled Flow |
|-----------|------------|-----------|-------------|
| L253      | M262       | L198      | 6353.0      |
| M262      | I150       | M239      | 5111.4      |
| M262      | M239       | I150      | 3754.3      |
| M262      | M239       | V241      | 3626.2      |
| M262      | V241       | M239      | 3982.7      |
| M262      | V241       | L294      | 3756.2      |
| M262      | V250       | L253      | 3848.6      |
| M262      | L253       | V250      | 6490.4      |
| M262      | M262       | I150      | 254.1       |
| M262      | M262       | V187      | 562.2       |
| M262      | M262       | L198      | 5794.6      |
| M262      | M262       | M239      | 76.6        |
| M262      | M262       | V241      | 113.7       |
| M262      | M262       | V250      | 122.7       |
| M262      | M262       | L253      | 677.6       |
| M262      | M262       | L294      | 191.4       |
| M262      | L294       | V241      | 4299.1      |
| L265      | L225       | L292      | 5188.2      |
| L265      | L225       | L294      | 3432.6      |
| L265      | I238       | L277      | 5047.0      |
| L265      | V241       | L288      | 7054.9      |
| L265      | V241       | L292      | 8498.6      |
| L265      | L265       | L119      | 41.3        |
| L265      | L265       | M120      | 55.1        |
| L265      | L265       | I197      | 142.7       |
| L265      | L265       | L225      | 562.2       |
| L265      | L265       | I238      | 237.0       |
| L265      | L265       | M239      | 720.4       |
| L265      | L265       | V241      | 1912.2      |
| L265      | L265       | L268      | 113.7       |
| L265      | L265       | L277      | 97.3        |
| L265      | L265       | L288      | 254.1       |
| L265      | L265       | L292      | 113.7       |
| L265      | L265       | V293      | 59.9        |
| L265      | L265       | L294      | 2366.9      |
| L265      | L277       | I238      | 4000.5      |
| L265      | L288       | V241      | 3090.9      |
| L265      | L288       | L292      | 5275.6      |
| L265      | L292       | L225      | 3236.8      |
| L265      | L292       | V241      | 3003.7      |
| L265      | L292       | L288      | 4255.7      |

| First Res | Second Res | Third Res | Scaled Flow |
|-----------|------------|-----------|-------------|
| L265      | L294       | L225      | 6968.0      |
| L268      | I150       | M239      | 3490.4      |
| L268      | M239       | I150      | 6414.8      |
| L268      | L265       | L294      | 4182.5      |
| L268      | L268       | I150      | 105.2       |
| L268      | L268       | I238      | 407.7       |
| L268      | L268       | M239      | 765.6       |
| L268      | L268       | L265      | 113.7       |
| L268      | L268       | L294      | 165.5       |
| L268      | L294       | L265      | 4603.3      |
| I276      | I276       | L292      | 215.5       |
| L277      | L225       | V241      | 4965.8      |
| L277      | L225       | L294      | 6293.2      |
| L277      | V241       | L225      | 3193.2      |
| L277      | V241       | L265      | 4402.2      |
| L277      | V241       | L288      | 4142.8      |
| L277      | V241       | L292      | 3944.8      |
| L277      | V241       | L294      | 4230.7      |
| L277      | L265       | V241      | 3927.0      |
| L277      | L265       | L294      | 4282.7      |
| L277      | L277       | M120      | 598.6       |
| L277      | L277       | I130      | 440.0       |
| L277      | L277       | V212      | 272.3       |
| L277      | L277       | I215      | 42.6        |
| L277      | L277       | I220      | 312.2       |
| L277      | L277       | L225      | 637.0       |
| L277      | L277       | I238      | 2494.4      |
| L277      | L277       | V241      | 153.8       |
| L277      | L277       | L265      | 97.3        |
| L277      | L277       | L288      | 165.5       |
| L277      | L277       | L292      | 334.0       |
| L277      | L277       | L294      | 89.9        |
| L277      | L288       | V241      | 4223.9      |
| L277      | L288       | L292      | 4398.9      |
| L277      | L292       | V241      | 4918.9      |
| L277      | L292       | L288      | 5379.9      |
| L277      | L294       | L225      | 3543.0      |
| L277      | L294       | V241      | 3704.0      |
| L277      | L294       | L265      | 4203.2      |
| L283      | L283       | V16       | 59.9        |
| L283      | L283       | I87       | 65.1        |



| First Res | Second Res | Third Res | Scaled Flow |
|-----------|------------|-----------|-------------|
| L283      | L283       | M137      | 89.9        |
| L283      | L283       | V161      | 272.3       |
| L283      | L283       | V212      | 55.1        |
| L283      | L283       | L287      | 562.2       |
| L283      | L283       | M291      | 407.7       |
| L283      | L283       | V343      | 334.0       |
| L283      | L287       | V343      | 4630.3      |
| L283      | V343       | L287      | 3888.3      |
| V285      | L77        | M81       | 3898.5      |
| V285      | M81        | L77       | 4701.8      |
| V285      | V285       | L77       | 59.9        |
| V285      | V285       | L78       | 495.1       |
| V285      | V285       | M81       | 132.4       |
| V285      | V285       | I87       | 178.1       |
| V285      | V285       | I130      | 173.6       |
| L287      | V26        | L78       | 4302.5      |
| L287      | V26        | V323      | 4968.5      |
| L287      | L78        | V26       | 4302.5      |
| L287      | L78        | L141      | 3659.6      |
| L287      | L78        | V323      | 3397.2      |
| L287      | M137       | I169      | 4686.9      |
| L287      | L141       | L78       | 3460.2      |
| L287      | I169       | M137      | 3752.5      |
| L287      | L287       | V26       | 97.3        |
| L287      | L287       | V45       | 153.8       |
| L287      | L287       | V53       | 178.1       |
| L287      | L287       | L78       | 97.3        |
| L287      | L287       | M137      | 357.2       |
| L287      | L287       | L141      | 76.6        |
| L287      | L287       | L159      | 49.1        |
| L287      | L287       | L167      | 527.7       |
| L287      | L287       | I169      | 165.5       |
| L287      | L287       | V212      | 122.7       |
| L287      | L287       | L283      | 562.2       |
| L287      | L287       | V323      | 220.8       |
| L287      | L287       | V343      | 1623.2      |
| L287      | V323       | V26       | 6143.8      |
| L287      | V323       | L78       | 4200.8      |
| L288      | L225       | L294      | 5196.9      |
| L288      | I238       | L277      | 4736.7      |
| L288      | M239       | V241      | 2756.3      |

| First Res | Second Res | Third Res | Scaled Flow |
|-----------|------------|-----------|-------------|
| L288      | V241       | M239      | 6991.8      |
| L288      | V241       | L265      | 7036.0      |
| L288      | L265       | V241      | 3185.2      |
| L288      | L265       | L294      | 4329.3      |
| L288      | L277       | I238      | 4378.1      |
| L288      | L288       | I197      | 42.6        |
| L288      | L288       | L225      | 677.6       |
| L288      | L288       | I238      | 220.8       |
| L288      | L288       | M239      | 153.8       |
| L288      | L288       | V241      | 1811.2      |
| L288      | L288       | L265      | 254.1       |
| L288      | L288       | L277      | 165.5       |
| L288      | L288       | L292      | 3066.4      |
| L288      | L288       | V293      | 464.3       |
| L288      | L288       | L294      | 407.7       |
| L288      | L294       | L225      | 4338.0      |
| L288      | L294       | L265      | 5010.6      |
| M291      | I150       | M239      | 4633.2      |
| M291      | M239       | I150      | 3771.4      |
| M291      | M291       | I150      | 132.4       |
| M291      | M291       | M216      | 97.3        |
| M291      | M291       | I238      | 220.8       |
| M291      | M291       | M239      | 55.1        |
| M291      | M291       | L283      | 407.7       |
| M291      | M291       | V293      | 55.1        |
| L292      | I150       | M239      | 3285.4      |
| L292      | L225       | L294      | 6481.4      |
| L292      | I238       | L277      | 4341.2      |
| L292      | M239       | I150      | 6491.0      |
| L292      | V241       | L265      | 8574.3      |
| L292      | L265       | V241      | 2930.4      |
| L292      | L265       | L294      | 3916.1      |
| L292      | L277       | I238      | 5005.8      |
| L292      | L292       | M120      | 70.7        |
| L292      | L292       | I150      | 50.6        |
| L292      | L292       | L225      | 1373.2      |
| L292      | L292       | I238      | 205.7       |
| L292      | L292       | M239      | 598.6       |
| L292      | L292       | V241      | 2018.0      |
| L292      | L292       | L265      | 113.7       |
| L292      | L292       | I276      | 215.5       |

| First Res | Second Res | Third Res | Scaled Flow |
|-----------|------------|-----------|-------------|
| L292      | L292       | L277      | 334.0       |
| L292      | L292       | L288      | 3066.4      |
| L292      | L292       | V293      | 237.0       |
| L292      | L292       | L294      | 334.0       |
| L292      | L294       | L225      | 3712.1      |
| L292      | L294       | L265      | 5271.3      |
| V293      | L225       | V241      | 5187.7      |
| V293      | L225       | L292      | 4789.5      |
| V293      | L225       | L294      | 4684.6      |
| V293      | M239       | V241      | 3991.6      |
| V293      | V241       | L225      | 3090.2      |
| V293      | V241       | M239      | 3769.6      |
| V293      | V241       | L265      | 4342.3      |
| V293      | V241       | L288      | 3549.8      |
| V293      | V241       | L292      | 3909.4      |
| V293      | V241       | L294      | 3250.1      |
| V293      | L265       | V241      | 3740.1      |
| V293      | L265       | L294      | 3350.0      |
| V293      | L288       | V241      | 5319.9      |
| V293      | L288       | L292      | 5542.5      |
| V293      | L292       | L225      | 3466.1      |
| V293      | L292       | V241      | 4749.5      |
| V293      | L292       | L288      | 4493.0      |
| V293      | V293       | I197      | 312.2       |
| V293      | V293       | L225      | 637.0       |
| V293      | V293       | I238      | 254.1       |
| V293      | V293       | M239      | 142.7       |
| V293      | V293       | V241      | 113.7       |
| V293      | V293       | L265      | 59.9        |
| V293      | V293       | L288      | 464.3       |
| V293      | V293       | M291      | 55.1        |
| V293      | V293       | L292      | 237.0       |
| V293      | V293       | L294      | 677.6       |
| V293      | L294       | L225      | 4796.2      |
| V293      | L294       | V241      | 5586.1      |
| V293      | L294       | L265      | 6685.0      |
| L294      | L198       | M262      | 4360.6      |
| L294      | I238       | L277      | 6166.7      |
| L294      | V241       | L288      | 5867.0      |
| L294      | V241       | L292      | 6375.4      |
| L294      | M262       | L198      | 6011.8      |

| First Res | Second Res | Third Res | Scaled Flow |
|-----------|------------|-----------|-------------|
| L294      | L277       | I238      | 3636.0      |
| L294      | L288       | V241      | 3375.9      |
| L294      | L288       | L292      | 5165.7      |
| L294      | L292       | V241      | 3441.8      |
| L294      | L292       | L288      | 4846.5      |
| L294      | L294       | L198      | 50.6        |
| L294      | L294       | L225      | 2366.9      |
| L294      | L294       | I238      | 562.2       |
| L294      | L294       | M239      | 527.7       |
| L294      | L294       | V241      | 1535.8      |
| L294      | L294       | M262      | 191.4       |
| L294      | L294       | L265      | 2366.9      |
| L294      | L294       | L268      | 165.5       |
| L294      | L294       | L277      | 89.9        |
| L294      | L294       | L288      | 407.7       |
| L294      | L294       | L292      | 334.0       |
| L294      | L294       | V293      | 677.6       |
| V300      | V300       | V45       | 59.9        |
| V300      | V300       | M219      | 65.1        |
| V300      | V300       | V343      | 97.3        |
| V323      | I169       | L170      | 4241.4      |
| V323      | L170       | I169      | 3622.9      |
| V323      | V323       | V26       | 6979.5      |
| V323      | V323       | L58       | 89.9        |
| V323      | V323       | L77       | 191.4       |
| V323      | V323       | L78       | 1157.6      |
| V323      | V323       | V86       | 813.3       |
| V323      | V323       | L141      | 122.7       |
| V323      | V323       | I169      | 254.1       |
| V323      | V323       | L170      | 142.7       |
| V323      | V323       | L287      | 220.8       |
| V333      | L75        | M182      | 3933.7      |
| V333      | M182       | L75       | 3519.5      |
| V333      | M182       | M201      | 4177.7      |
| V333      | M201       | M182      | 3953.8      |
| V333      | V333       | L75       | 89.9        |
| V333      | V333       | M182      | 55.1        |
| V333      | V333       | M201      | 42.6        |
| L337      | L75        | M182      | 4438.6      |
| L337      | M182       | L75       | 3629.3      |
| L337      | L337       | L75       | 334.0       |

| First Res | Second Res | Third Res | Scaled Flow |
|-----------|------------|-----------|-------------|
| L337      | L337       | M109      | 464.3       |
| L337      | L337       | I149      | 70.7        |
| L337      | L337       | M182      | 165.5       |
| V343      | V33        | V45       | 3430.1      |
| V343      | V33        | L141      | 4080.7      |
| V343      | V45        | V33       | 4726.1      |
| V343      | L141       | V33       | 3645.6      |
| V343      | V343       | V16       | 42.6        |
| V343      | V343       | V33       | 122.7       |
| V343      | V343       | V45       | 381.7       |
| V343      | V343       | L141      | 76.6        |
| V343      | V343       | L167      | 142.7       |
| V343      | V343       | I169      | 46.5        |
| V343      | V343       | L283      | 334.0       |
| V343      | V343       | L287      | 1623.2      |
| V343      | V343       | V300      | 97.3        |
| V361      | V361       | I144      | 256.9       |
| V361      | V361       | L154      | 215.5       |
| V361      | V361       | L167      | 80.7        |
| L367      | L116       | L125      | 4721.7      |
| L367      | L125       | L116      | 4549.8      |
| L367      | L367       | L116      | 76.6        |
| L367      | L367       | L125      | 65.1        |
| L367      | L367       | I149      | 334.0       |

**Table S13.** Community membership for activated p38γ

---

|          |                                                                                                                     |
|----------|---------------------------------------------------------------------------------------------------------------------|
| module1  | 86, 119, 120, 150, 197, 198, 225, 238, 239, 241, 250, 253, 262, 265, 268, 276, 277, 288, 291, 292, 293, 294         |
| module2  | 26, 33, 45, 58, 77, 78, 81, 86, 87, 89, 109, 141, 149, 169, 170, 174, 241, 285, 287, 323                            |
| module3  | 23, 30, 41, 45, 55, 77, 78, 81, 87, 89, 109, 112, 119, 161, 167, 197, 265, 283, 285                                 |
| module4  | 26, 30, 41, 55, 58, 66, 77, 78, 81, 86, 87, 89, 90, 109, 112, 141, 144, 167, 169, 170, 174, 182, 201, 285, 323, 337 |
| module5  | 26, 53, 66, 77, 78, 81, 89, 109, 116, 125, 137, 141, 144, 159, 167, 169, 170, 174, 209, 283, 287, 323, 343          |
| module6  | 58, 75, 77, 90, 109, 144, 174, 182, 186, 187, 201, 250, 253, 333, 337                                               |
| module7  | 53, 116, 125, 137, 159, 169, 186, 215, 216, 219, 300, 367                                                           |
| module8  | 26, 33, 45, 78, 86, 87, 137, 141, 170, 174, 287, 300, 323, 343                                                      |
| module9  | 150, 182, 187, 198, 201, 239, 241, 250, 253, 262, 294                                                               |
| module10 | 120, 130, 212, 215, 220, 225, 238, 241, 265, 268, 277, 288, 291, 292, 293, 294                                      |
| module11 | 58, 75, 150, 197, 198, 239, 250, 253, 262                                                                           |
| module12 | 16, 26, 33, 45, 53, 78, 137, 141, 159, 167, 169, 212, 283, 287, 300, 323, 343                                       |
| module13 | 130, 215, 216, 220, 238, 277, 285                                                                                   |
| module14 | 53, 87, 109, 112, 116, 134, 137, 150, 159, 161, 167, 169, 212, 216, 238, 239, 283, 287, 291, 293                    |
| module15 | 26, 30, 66, 78, 89, 109, 112, 130, 159, 167, 169, 170, 212, 215, 219, 277, 287                                      |
| module16 | 58, 78, 86, 116, 125, 141, 149, 337, 367                                                                            |
| module17 | 144, 154, 167, 361                                                                                                  |
| module18 | 78, 149                                                                                                             |
| module19 | 55, 167                                                                                                             |
| module20 | 182, 337                                                                                                            |
| module21 | 58, 182                                                                                                             |
| module22 | 55, 89                                                                                                              |
| module23 | 55, 197                                                                                                             |
| module24 | 357                                                                                                                 |

**Table S14.** Methyl 3-residue flow for +BIRB796 p38γ

| First Res | Second Res | Third Res | Scaled Flow | First Res | Second Res | Third Res | Scaled Flow |
|-----------|------------|-----------|-------------|-----------|------------|-----------|-------------|
| V16       | V16        | L30       | 527.7       | V26       | L89        | L66       | 8512.1      |
| V16       | V16        | V33       | 653.3       | L30       | L30        | V16       | 527.7       |
| V16       | V16        | I55       | 384.8       | L30       | L30        | V23       | 911.5       |
| V16       | V16        | L78       | 1749.4      | L30       | L30        | V26       | 1749.4      |
| V16       | V16        | M81       | 348.6       | L30       | L30        | V33       | 181.8       |
| V16       | V16        | I87       | 106         | L30       | L30        | L66       | 982.6       |
| V16       | V16        | L89       | 116.9       | L30       | L30        | I87       | 844.9       |
| V16       | V16        | M109      | 150.7       | L30       | L30        | L89       | 1416        |
| V16       | V16        | V343      | 106         | L30       | L30        | L90       | 724.5       |
| V16       | V16        | L367      | 353.4       | L30       | L30        | V361      | 301         |
| V16       | L30        | L89       | 5135.1      | L30       | L66        | L89       | 5492.2      |
| V16       | M81        | V343      | 5646.3      | L30       | L66        | L90       | 5936.1      |
| V16       | L89        | L30       | 3299.8      | L30       | L89        | L66       | 6545.1      |
| V16       | V343       | M81       | 4068.4      | L30       | L90        | L66       | 5226.4      |
| V23       | V23        | V26       | 379.4       | V33       | V33        | V16       | 653.3       |
| V23       | V23        | L30       | 911.5       | V33       | V33        | L30       | 181.8       |
| V23       | V23        | V41       | 1139.5      | V33       | V33        | L337      | 97.3        |
| V23       | V23        | I55       | 384.8       | V41       | V41        | V23       | 1139.5      |
| V23       | V23        | L66       | 571.9       | V41       | V41        | V53       | 187.7       |
| V23       | V23        | L75       | 310.8       | V41       | V41        | I55       | 324.5       |
| V23       | V23        | I87       | 1749.4      | V41       | V41        | L77       | 293.5       |
| V23       | V23        | L89       | 982.6       | V41       | V41        | L78       | 141.8       |
| V23       | V23        | L90       | 95.9        | V41       | V41        | I87       | 1139.5      |
| V23       | V23        | M112      | 141.8       | V41       | V41        | M112      | 527.7       |
| V23       | V23        | L174      | 348.6       | V41       | V41        | I149      | 249.7       |
| V23       | L66        | L89       | 5280.4      | V41       | V41        | L174      | 724.5       |
| V23       | L66        | L90       | 6800.3      | V41       | V53        | M112      | 4442.5      |
| V23       | L89        | L66       | 6559.7      | V41       | L77        | I149      | 4881.9      |
| V23       | L90        | L66       | 4046.2      | V41       | L77        | L174      | 3971.3      |
| V26       | V26        | V23       | 379.4       | V41       | M112       | V53       | 6114.9      |
| V26       | V26        | L30       | 1749.4      | V41       | I149       | L77       | 4670.2      |
| V26       | V26        | L66       | 448.2       | V41       | L174       | L77       | 5415.3      |
| V26       | V26        | L75       | 706.6       | V45       | V45        | L78       | 225.1       |
| V26       | V26        | V86       | 155.8       | V45       | V45        | L90       | 225.1       |
| V26       | V26        | I87       | 412.6       | V53       | V53        | V41       | 187.7       |
| V26       | V26        | L89       | 1874.9      | V53       | V53        | I87       | 205.7       |
| V26       | V26        | L174      | 670.1       | V53       | V53        | M109      | 2332.2      |
| V26       | V26        | V361      | 240.6       | V53       | V53        | M112      | 3633.1      |
| V26       | L66        | L89       | 4508.6      | V53       | V53        | L116      | 782.7       |

| First Res | Second Res | Third Res | Scaled Flow |
|-----------|------------|-----------|-------------|
| V53       | V53        | L154      | 1749.4      |
| V53       | V53        | V161      | 348.6       |
| V53       | V53        | L170      | 3633.1      |
| I55       | V23        | I87       | 4928.6      |
| I55       | I55        | V16       | 384.8       |
| I55       | I55        | V23       | 384.8       |
| I55       | I55        | V41       | 324.5       |
| I55       | I55        | L66       | 218.2       |
| I55       | I55        | L78       | 401.3       |
| I55       | I55        | I87       | 143.8       |
| I55       | I55        | V333      | 130.6       |
| I55       | I87        | V23       | 3713.8      |
| L58       | L58        | L66       | 205.7       |
| L58       | L58        | L77       | 246.2       |
| L58       | L58        | L78       | 348.6       |
| L58       | L58        | M81       | 571.9       |
| L58       | L58        | V86       | 486.5       |
| L58       | L58        | L89       | 412.6       |
| L58       | L66        | L89       | 4912.4      |
| L58       | L89        | L66       | 6061.3      |
| L66       | L66        | V23       | 571.9       |
| L66       | L66        | V26       | 448.2       |
| L66       | L66        | L30       | 982.6       |
| L66       | L66        | I55       | 218.2       |
| L66       | L66        | L58       | 205.7       |
| L66       | L66        | L89       | 4665.1      |
| L66       | L66        | L90       | 3870.3      |
| L66       | L66        | L174      | 106         |
| L75       | L75        | V23       | 310.8       |
| L75       | L75        | V26       | 706.6       |
| L75       | L75        | L174      | 150.7       |
| L75       | L75        | V186      | 612.1       |
| L77       | L77        | V41       | 293.5       |
| L77       | L77        | L58       | 246.2       |
| L77       | L77        | V86       | 187.7       |
| L77       | L77        | I149      | 2754.3      |
| L77       | L77        | L174      | 2149.7      |
| L77       | L77        | V333      | 412.6       |
| L78       | L78        | V16       | 1749.4      |
| L78       | L78        | V41       | 141.8       |
| L78       | L78        | V45       | 225.1       |

| First Res | Second Res | Third Res | Scaled Flow |
|-----------|------------|-----------|-------------|
| L78       | L78        | I55       | 401.3       |
| L78       | L78        | L58       | 348.6       |
| L78       | L78        | M81       | 670.1       |
| L78       | L78        | L89       | 187.7       |
| L78       | L78        | M109      | 124.5       |
| L78       | L78        | V343      | 293.5       |
| L78       | M81        | V343      | 5826.3      |
| L78       | V343       | M81       | 4404.5      |
| M81       | M81        | V16       | 348.6       |
| M81       | M81        | L58       | 571.9       |
| M81       | M81        | L78       | 670.1       |
| M81       | M81        | V343      | 2996.1      |
| V86       | V26        | L89       | 4323.2      |
| V86       | L77        | L174      | 4148.7      |
| V86       | V86        | V26       | 155.8       |
| V86       | V86        | L58       | 486.5       |
| V86       | V86        | L77       | 187.7       |
| V86       | V86        | L89       | 116.9       |
| V86       | V86        | L174      | 320         |
| V86       | L89        | V26       | 4018.4      |
| V86       | L174       | L77       | 4840.7      |
| I87       | V26        | L89       | 4979.5      |
| I87       | V53        | M112      | 5019        |
| I87       | I87        | V16       | 106         |
| I87       | I87        | V23       | 1749.4      |
| I87       | I87        | V26       | 412.6       |
| I87       | I87        | L30       | 844.9       |
| I87       | I87        | V41       | 1139.5      |
| I87       | I87        | V53       | 205.7       |
| I87       | I87        | I55       | 143.8       |
| I87       | I87        | L89       | 171.1       |
| I87       | I87        | M112      | 187.7       |
| I87       | I87        | V161      | 106         |
| I87       | I87        | V361      | 106.8       |
| I87       | L89        | V26       | 3838.9      |
| I87       | M112       | V53       | 4894.5      |
| L89       | V16        | L78       | 3890.1      |
| L89       | V23        | I87       | 6021.8      |
| L89       | L66        | L90       | 12887.1     |
| L89       | L78        | V16       | 4398.1      |
| L89       | I87        | V23       | 3337.1      |

| First Res | Second Res | Third Res | Scaled Flow |
|-----------|------------|-----------|-------------|
| L89       | L89        | V16       | 116.9       |
| L89       | L89        | V23       | 982.6       |
| L89       | L89        | V26       | 1874.9      |
| L89       | L89        | L30       | 1416        |
| L89       | L89        | L58       | 412.6       |
| L89       | L89        | L66       | 4665.1      |
| L89       | L89        | L78       | 187.7       |
| L89       | L89        | V86       | 116.9       |
| L89       | L89        | I87       | 171.1       |
| L89       | L89        | L90       | 619.3       |
| L89       | L89        | L174      | 155.8       |
| L89       | L90        | L66       | 3467.4      |
| L90       | L66        | L89       | 11847.7     |
| L90       | L89        | L66       | 3971.9      |
| L90       | L90        | V23       | 95.9        |
| L90       | L90        | L30       | 724.5       |
| L90       | L90        | V45       | 225.1       |
| L90       | L90        | L66       | 3870.3      |
| L90       | L90        | L89       | 619.3       |
| M109      | V16        | L78       | 4210.8      |
| M109      | V53        | L170      | 6922.9      |
| M109      | L78        | V16       | 4009.9      |
| M109      | M109       | V16       | 150.7       |
| M109      | M109       | V53       | 2332.2      |
| M109      | M109       | L78       | 124.5       |
| M109      | M109       | M112      | 2332.2      |
| M109      | M109       | L116      | 454.5       |
| M109      | M109       | L154      | 272.7       |
| M109      | M109       | L170      | 1034.3      |
| M109      | M109       | V343      | 208.6       |
| M109      | M112       | L170      | 6922.9      |
| M109      | L154       | L170      | 4382        |
| M109      | L170       | V53       | 4407.2      |
| M109      | L170       | M112      | 4407.2      |
| M109      | L170       | L154      | 7098.5      |
| M112      | V23        | I87       | 4007.5      |
| M112      | I87        | V23       | 4315.9      |
| M112      | M112       | V23       | 141.8       |
| M112      | M112       | V41       | 527.7       |
| M112      | M112       | V53       | 3633.1      |
| M112      | M112       | I87       | 187.7       |

| First Res | Second Res | Third Res | Scaled Flow |
|-----------|------------|-----------|-------------|
| M112      | M112       | M109      | 2332.2      |
| M112      | M112       | L154      | 527.7       |
| M112      | M112       | L170      | 3633.1      |
| M112      | L154       | L170      | 3697.6      |
| M112      | L170       | L154      | 10957.6     |
| L116      | V53        | M109      | 5231.3      |
| L116      | V53        | L154      | 6055.7      |
| L116      | V53        | L170      | 6458.1      |
| L116      | M109       | V53       | 4292.6      |
| L116      | L116       | V53       | 782.7       |
| L116      | L116       | M109      | 454.5       |
| L116      | L116       | I144      | 527.7       |
| L116      | L116       | L154      | 106         |
| L116      | L116       | L159      | 793.7       |
| L116      | L116       | V161      | 293.5       |
| L116      | L116       | L170      | 268.9       |
| L116      | L154       | V53       | 3271.4      |
| L116      | L154       | L170      | 4400.8      |
| L116      | L170       | V53       | 4473.6      |
| L116      | L170       | L154      | 5643        |
| M120      | M120       | M219      | 679.5       |
| M120      | M120       | L283      | 130.6       |
| L125      | L125       | I215      | 338.8       |
| L125      | L125       | L283      | 284.9       |
| I130      | I130       | I220      | 793.7       |
| I130      | I130       | V300      | 1520.3      |
| I130      | I130       | V361      | 173.9       |
| V134      | V134       | M291      | 571.9       |
| M137      | M137       | I209      | 763.7       |
| M137      | M137       | V212      | 619.3       |
| M137      | M137       | I215      | 246.2       |
| M137      | M137       | M219      | 246.2       |
| M137      | M137       | L283      | 844.9       |
| M137      | M137       | M291      | 2627.8      |
| M137      | M137       | V293      | 106         |
| M137      | I209       | I215      | 5509.5      |
| M137      | V212       | V293      | 6878.2      |
| M137      | I215       | I209      | 3743.1      |
| M137      | V293       | V212      | 4070.4      |
| L141      | L141       | I150      | 205.7       |
| L141      | L141       | I197      | 1225.9      |

| First Res | Second Res | Third Res | Scaled Flow |
|-----------|------------|-----------|-------------|
| L141      | L141       | L198      | 1749.4      |
| L141      | L141       | M201      | 724.5       |
| L141      | L141       | I209      | 310.8       |
| L141      | L141       | I215      | 225.1       |
| L141      | L141       | M239      | 141.8       |
| L141      | L141       | V250      | 116.9       |
| L141      | L141       | M262      | 659.4       |
| L141      | L141       | L268      | 268.9       |
| L141      | L141       | L283      | 106         |
| L141      | L141       | M291      | 448.2       |
| L141      | L141       | L294      | 171.1       |
| L141      | I150       | L268      | 5125.5      |
| L141      | L198       | V250      | 7968.5      |
| L141      | M201       | V250      | 6378.6      |
| L141      | I209       | I215      | 4619.3      |
| L141      | I215       | I209      | 4186.4      |
| L141      | I215       | L283      | 4517.3      |
| L141      | M239       | M262      | 4532        |
| L141      | M239       | L294      | 4483.3      |
| L141      | V250       | L198      | 2990.6      |
| L141      | V250       | M201      | 3640.7      |
| L141      | M262       | M239      | 7556.6      |
| L141      | M262       | L268      | 5266.9      |
| L141      | L268       | I150      | 5534.2      |
| L141      | L268       | M262      | 3766.5      |
| L141      | L283       | I215      | 3708.7      |
| L141      | L294       | M239      | 4709.6      |
| I144      | I144       | L116      | 527.7       |
| I144      | I144       | L159      | 150.7       |
| I144      | I144       | I169      | 95.9        |
| I149      | I149       | V41       | 249.7       |
| I149      | I149       | L77       | 2754.3      |
| I149      | I149       | L174      | 436.1       |
| I149      | I149       | V333      | 199.3       |
| I150      | L141       | L198      | 3447.2      |
| I150      | I150       | L141      | 205.7       |
| I150      | I150       | I197      | 448.2       |
| I150      | I150       | L198      | 911.5       |
| I150      | I150       | M201      | 527.7       |
| I150      | I150       | V212      | 448.2       |
| I150      | I150       | V250      | 619.3       |

| First Res | Second Res | Third Res | Scaled Flow |
|-----------|------------|-----------|-------------|
| I150      | I150       | M262      | 248.1       |
| I150      | I150       | L265      | 724.5       |
| I150      | I150       | L268      | 4665.1      |
| I150      | I150       | V293      | 205.7       |
| I150      | I197       | L198      | 4050.3      |
| I150      | L198       | L141      | 5726.2      |
| I150      | L198       | I197      | 5303.8      |
| I150      | L198       | M201      | 5248.3      |
| I150      | M201       | L198      | 4241.1      |
| I150      | M201       | V250      | 4655.9      |
| I150      | V212       | V293      | 5913.8      |
| I150      | V250       | M201      | 4935.4      |
| I150      | M262       | L268      | 2539.2      |
| I150      | L268       | M262      | 12287.7     |
| I150      | V293       | V212      | 4662        |
| L154      | V53        | M109      | 7293.9      |
| L154      | V53        | M112      | 7384        |
| L154      | M109       | V53       | 3452.9      |
| L154      | M109       | M112      | 4220.2      |
| L154      | M112       | V53       | 4312.6      |
| L154      | M112       | M109      | 5206.6      |
| L154      | M112       | L170      | 3540.2      |
| L154      | L154       | V53       | 1749.4      |
| L154      | L154       | M109      | 272.7       |
| L154      | L154       | M112      | 527.7       |
| L154      | L154       | L116      | 106         |
| L154      | L154       | L170      | 3870.3      |
| L154      | L170       | M112      | 11193.9     |
| L159      | L159       | L116      | 793.7       |
| L159      | L159       | I144      | 150.7       |
| L159      | L159       | V161      | 228.3       |
| V161      | V161       | V53       | 348.6       |
| V161      | V161       | I87       | 106         |
| V161      | V161       | L116      | 293.5       |
| V161      | V161       | L159      | 228.3       |
| V161      | V161       | L167      | 106         |
| L167      | L167       | V161      | 106         |
| L167      | L167       | I215      | 448.2       |
| I169      | I169       | I144      | 95.9        |
| L170      | L170       | V53       | 3633.1      |
| L170      | L170       | M109      | 1034.3      |



| First Res | Second Res | Third Res | Scaled Flow |
|-----------|------------|-----------|-------------|
| L170      | L170       | M112      | 3633.1      |
| L170      | L170       | L116      | 268.9       |
| L170      | L170       | L154      | 3870.3      |
| L174      | V26        | L89       | 5622.5      |
| L174      | L66        | L89       | 4774        |
| L174      | L77        | I149      | 7572        |
| L174      | L89        | V26       | 3559.1      |
| L174      | L89        | L66       | 5261.3      |
| L174      | I149       | L77       | 3657.9      |
| L174      | L174       | V23       | 348.6       |
| L174      | L174       | V26       | 670.1       |
| L174      | L174       | V41       | 724.5       |
| L174      | L174       | L66       | 106         |
| L174      | L174       | L75       | 150.7       |
| L174      | L174       | L77       | 2149.7      |
| L174      | L174       | V86       | 320         |
| L174      | L174       | L89       | 155.8       |
| L174      | L174       | I149      | 436.1       |
| L174      | L174       | V186      | 124.5       |
| M182      | M182       | V187      | 494.7       |
| M182      | M182       | V323      | 96.5        |
| V186      | V186       | L75       | 612.1       |
| V186      | V186       | L174      | 124.5       |
| V186      | V186       | V187      | 996.5       |
| V186      | V186       | V300      | 97.3        |
| V187      | V187       | M182      | 494.7       |
| V187      | V187       | V186      | 996.5       |
| I197      | I150       | L268      | 5879.4      |
| I197      | I197       | L141      | 1225.9      |
| I197      | I197       | I150      | 448.2       |
| I197      | I197       | L198      | 2149.7      |
| I197      | I197       | M201      | 348.6       |
| I197      | I197       | I209      | 1488        |
| I197      | I197       | V212      | 268.9       |
| I197      | I197       | I215      | 527.7       |
| I197      | I197       | I238      | 95.9        |
| I197      | I197       | M239      | 116.9       |
| I197      | I197       | V250      | 379.4       |
| I197      | I197       | M262      | 369         |
| I197      | I197       | L265      | 225.1       |
| I197      | I197       | L268      | 320         |

| First Res | Second Res | Third Res | Scaled Flow |
|-----------|------------|-----------|-------------|
| I197      | I197       | M291      | 106         |
| I197      | I197       | V293      | 670.1       |
| I197      | L198       | M201      | 7493        |
| I197      | M201       | L198      | 3353.8      |
| I197      | M201       | V250      | 4658.5      |
| I197      | V212       | V293      | 4643.6      |
| I197      | I238       | M239      | 4391.8      |
| I197      | I238       | M262      | 3244.2      |
| I197      | I238       | V293      | 3128.3      |
| I197      | M239       | I238      | 4607.9      |
| I197      | M239       | M262      | 4640.5      |
| I197      | V250       | M201      | 4786        |
| I197      | M262       | I238      | 4865.6      |
| I197      | M262       | M239      | 6633.4      |
| I197      | M262       | L268      | 4570.6      |
| I197      | L268       | I150      | 5273.9      |
| I197      | L268       | M262      | 4217.9      |
| I197      | V293       | V212      | 6304.9      |
| I197      | V293       | I238      | 5578.5      |
| L198      | I150       | L268      | 6172.7      |
| L198      | I197       | I209      | 7884.4      |
| L198      | L198       | L141      | 1749.4      |
| L198      | L198       | I150      | 911.5       |
| L198      | L198       | I197      | 2149.7      |
| L198      | L198       | M201      | 2299.8      |
| L198      | L198       | I209      | 137.1       |
| L198      | L198       | V212      | 1225.9      |
| L198      | L198       | I215      | 106         |
| L198      | L198       | M216      | 187.7       |
| L198      | L198       | I238      | 911.5       |
| L198      | L198       | M239      | 1058.5      |
| L198      | L198       | V241      | 187.7       |
| L198      | L198       | V250      | 1874.9      |
| L198      | L198       | M262      | 974.2       |
| L198      | L198       | L265      | 571.9       |
| L198      | L198       | L268      | 724.5       |
| L198      | L198       | I276      | 348.6       |
| L198      | L198       | M291      | 187.7       |
| L198      | L198       | L292      | 106         |
| L198      | L198       | V293      | 1225.9      |
| L198      | L198       | L294      | 670.1       |

| First Res | Second Res | Third Res | Scaled Flow |
|-----------|------------|-----------|-------------|
| L198      | I209       | I197      | 2720.4      |
| L198      | I209       | I215      | 4318.1      |
| L198      | V212       | V293      | 5584.3      |
| L198      | I215       | I209      | 4036.2      |
| L198      | M216       | I276      | 3904.9      |
| L198      | M216       | L292      | 5384.8      |
| L198      | I238       | M239      | 4940.9      |
| L198      | I238       | V241      | 6731.9      |
| L198      | I238       | I276      | 7630.6      |
| L198      | M239       | I238      | 5279.4      |
| L198      | M239       | V241      | 8272.9      |
| L198      | M239       | M262      | 6355.7      |
| L198      | M239       | L294      | 5527.9      |
| L198      | V241       | I238      | 3952.2      |
| L198      | V241       | M239      | 4545.5      |
| L198      | V241       | I276      | 4040        |
| L198      | M262       | M239      | 6345        |
| L198      | L268       | I150      | 5615.8      |
| L198      | I276       | M216      | 4679.5      |
| L198      | I276       | I238      | 5368.3      |
| L198      | I276       | V241      | 4841.3      |
| L198      | I276       | L292      | 4755.9      |
| L198      | L292       | M216      | 4649.6      |
| L198      | L292       | I276      | 3426.8      |
| L198      | V293       | V212      | 5584.3      |
| L198      | L294       | M239      | 4565.9      |
| M201      | I150       | L268      | 5907.5      |
| M201      | I197       | L198      | 3219.6      |
| M201      | L198       | I197      | 7527.6      |
| M201      | M201       | L141      | 724.5       |
| M201      | M201       | I150      | 527.7       |
| M201      | M201       | I197      | 348.6       |
| M201      | M201       | L198      | 2299.8      |
| M201      | M201       | M239      | 187.7       |
| M201      | M201       | V250      | 2459        |
| M201      | M201       | L253      | 2149.7      |
| M201      | M201       | M262      | 248.1       |
| M201      | M201       | L265      | 782.7       |
| M201      | M201       | L268      | 412.6       |
| M201      | M201       | L294      | 844.9       |
| M201      | M239       | M262      | 5211.7      |

| First Res | Second Res | Third Res | Scaled Flow |
|-----------|------------|-----------|-------------|
| M201      | M239       | L294      | 3925.7      |
| M201      | M262       | M239      | 5840.3      |
| M201      | M262       | L268      | 4131.9      |
| M201      | L268       | I150      | 5430.2      |
| M201      | L268       | M262      | 4665.2      |
| M201      | L294       | M239      | 6475.5      |
| I209      | M137       | M291      | 5015.2      |
| I209      | L141       | L198      | 4749.1      |
| I209      | I197       | L198      | 7574.7      |
| I209      | L198       | L141      | 3780.4      |
| I209      | L198       | I197      | 3238.3      |
| I209      | L198       | V212      | 3852.1      |
| I209      | I209       | M137      | 763.7       |
| I209      | I209       | L141      | 310.8       |
| I209      | I209       | I197      | 1488        |
| I209      | I209       | L198      | 137.1       |
| I209      | I209       | V212      | 118.6       |
| I209      | I209       | I215      | 1967.9      |
| I209      | I209       | M262      | 158         |
| I209      | I209       | L283      | 384.8       |
| I209      | I209       | M291      | 679.5       |
| I209      | I209       | V293      | 261         |
| I209      | V212       | L198      | 3714.1      |
| I209      | V212       | V293      | 4491.8      |
| I209      | M291       | M137      | 4789.7      |
| I209      | V293       | V212      | 5553.9      |
| V212      | M137       | M291      | 4337.8      |
| V212      | I150       | L268      | 4925.8      |
| V212      | I197       | L198      | 3589.7      |
| V212      | I197       | I209      | 4511        |
| V212      | L198       | I197      | 6324.1      |
| V212      | I209       | I197      | 3628.9      |
| V212      | V212       | M137      | 619.3       |
| V212      | V212       | I150      | 448.2       |
| V212      | V212       | I197      | 268.9       |
| V212      | V212       | L198      | 1225.9      |
| V212      | V212       | I209      | 118.6       |
| V212      | V212       | I238      | 982.6       |
| V212      | V212       | M239      | 619.3       |
| V212      | V212       | V241      | 571.9       |
| V212      | V212       | M262      | 1012        |

| First Res | Second Res | Third Res | Scaled Flow |
|-----------|------------|-----------|-------------|
| V212      | V212       | L265      | 95.9        |
| V212      | V212       | L268      | 1139.5      |
| V212      | V212       | L276      | 1058.5      |
| V212      | V212       | M291      | 1139.5      |
| V212      | V212       | L292      | 106         |
| V212      | V212       | V293      | 3870.3      |
| V212      | I238       | M239      | 5638.5      |
| V212      | I238       | V241      | 5727.5      |
| V212      | I238       | L276      | 6561.3      |
| V212      | M239       | I238      | 4674.2      |
| V212      | M239       | V241      | 6147        |
| V212      | M239       | M262      | 5567        |
| V212      | V241       | I238      | 4610.5      |
| V212      | V241       | M239      | 5969.1      |
| V212      | M262       | M239      | 7050.7      |
| V212      | L268       | I150      | 7132.2      |
| V212      | I276       | I238      | 6784.7      |
| V212      | I276       | L292      | 6248.3      |
| V212      | M291       | M137      | 5599.4      |
| V212      | L292       | I276      | 2964.3      |
| I215      | M137       | M291      | 4965.6      |
| I215      | L141       | L198      | 4588.3      |
| I215      | I197       | L198      | 5757.3      |
| I215      | L198       | L141      | 3767        |
| I215      | L198       | I197      | 3611.6      |
| I215      | I215       | L125      | 338.8       |
| I215      | I215       | M137      | 246.2       |
| I215      | I215       | L141      | 225.1       |
| I215      | I215       | L167      | 448.2       |
| I215      | I215       | I197      | 527.7       |
| I215      | I215       | L198      | 106         |
| I215      | I215       | I209      | 1967.9      |
| I215      | I215       | M216      | 246.2       |
| I215      | I215       | M239      | 106         |
| I215      | I215       | M262      | 353.4       |
| I215      | I215       | L277      | 246.2       |
| I215      | I215       | L283      | 1631.4      |
| I215      | I215       | M291      | 141.8       |
| I215      | I215       | L292      | 571.9       |
| I215      | M216       | L277      | 5929.3      |
| I215      | M216       | L292      | 4814.7      |

| First Res | Second Res | Third Res | Scaled Flow |
|-----------|------------|-----------|-------------|
| I215      | M239       | M262      | 4584.5      |
| I215      | M262       | M239      | 6621.6      |
| I215      | L277       | M216      | 5929.3      |
| I215      | L277       | L292      | 4523.2      |
| I215      | M291       | M137      | 4273.2      |
| I215      | L292       | M216      | 6322.4      |
| I215      | L292       | L277      | 5939.6      |
| M216      | I215       | L283      | 4088.4      |
| M216      | M216       | L198      | 187.7       |
| M216      | M216       | I215      | 246.2       |
| M216      | M216       | I238      | 1225.9      |
| M216      | M216       | M239      | 141.8       |
| M216      | M216       | V241      | 95.9        |
| M216      | M216       | I276      | 1749.4      |
| M216      | M216       | L277      | 7522.2      |
| M216      | M216       | L283      | 293.5       |
| M216      | M216       | L288      | 246.2       |
| M216      | M216       | L292      | 4385.6      |
| M216      | M216       | V293      | 187.7       |
| M216      | I238       | M239      | 7692.3      |
| M216      | I238       | V241      | 8097.7      |
| M216      | I238       | I276      | 6263.3      |
| M216      | M239       | I238      | 3661.8      |
| M216      | M239       | V241      | 5394.3      |
| M216      | V241       | I238      | 3499.8      |
| M216      | V241       | M239      | 4897.5      |
| M216      | V241       | I276      | 2998.9      |
| M216      | V241       | L288      | 3510.6      |
| M216      | I276       | I238      | 7567.7      |
| M216      | I276       | V241      | 8383.7      |
| M216      | L283       | I215      | 4306.2      |
| M216      | L288       | V241      | 4493.1      |
| M219      | M137       | M291      | 4919.7      |
| M219      | M219       | M120      | 679.5       |
| M219      | M219       | M137      | 246.2       |
| M219      | M219       | L283      | 571.9       |
| M219      | M219       | V285      | 535.2       |
| M219      | M219       | M291      | 155.8       |
| M219      | M291       | M137      | 4338.9      |
| I220      | I220       | I130      | 793.7       |
| I220      | I220       | V300      | 284.9       |

| First Res | Second Res | Third Res | Scaled Flow |
|-----------|------------|-----------|-------------|
| I220      | I220       | V361      | 238.5       |
| L225      | L225       | I238      | 246.2       |
| L225      | L225       | M239      | 448.2       |
| L225      | L225       | V241      | 1058.5      |
| L225      | L225       | I276      | 225.1       |
| L225      | L225       | L288      | 1520.3      |
| L225      | L225       | L294      | 2299.8      |
| L225      | L225       | L357      | 250.8       |
| L225      | I238       | M239      | 4515        |
| L225      | I238       | V241      | 4010.5      |
| L225      | I238       | I276      | 5829.4      |
| L225      | M239       | I238      | 5443.2      |
| L225      | M239       | V241      | 5249        |
| L225      | M239       | L294      | 3626.9      |
| L225      | V241       | I238      | 6765        |
| L225      | V241       | M239      | 7344.4      |
| L225      | V241       | I276      | 6120.2      |
| L225      | I276       | I238      | 5682.3      |
| L225      | I276       | V241      | 3536.6      |
| L225      | L294       | M239      | 7812.2      |
| I238      | I197       | L198      | 3342.5      |
| I238      | L198       | I197      | 6753.6      |
| I238      | V212       | V293      | 5135.5      |
| I238      | M216       | L277      | 8452.4      |
| I238      | M216       | L292      | 6759.9      |
| I238      | L225       | L294      | 4407        |
| I238      | I238       | I197      | 95.9        |
| I238      | I238       | L198      | 911.5       |
| I238      | I238       | V212      | 982.6       |
| I238      | I238       | M216      | 1225.9      |
| I238      | I238       | L225      | 246.2       |
| I238      | I238       | M239      | 2996.1      |
| I238      | I238       | V241      | 2996.1      |
| I238      | I238       | M262      | 1313.9      |
| I238      | I238       | L268      | 95.9        |
| I238      | I238       | I276      | 6693        |
| I238      | I238       | L277      | 412.6       |
| I238      | I238       | L288      | 782.7       |
| I238      | I238       | L292      | 619.3       |
| I238      | I238       | V293      | 1416        |
| I238      | I238       | L294      | 320         |

| First Res | Second Res | Third Res | Scaled Flow |
|-----------|------------|-----------|-------------|
| I238      | M239       | V241      | 6289.4      |
| I238      | M239       | M262      | 8611.1      |
| I238      | M239       | L294      | 9712.1      |
| I238      | V241       | M239      | 6289.4      |
| I238      | M262       | M239      | 5262.4      |
| I238      | M262       | L268      | 7491.5      |
| I238      | L268       | M262      | 3019.2      |
| I238      | L277       | M216      | 5482.7      |
| I238      | L277       | L292      | 4888.1      |
| I238      | L292       | M216      | 5056.7      |
| I238      | L292       | L277      | 5637        |
| I238      | V293       | V212      | 6120.1      |
| I238      | L294       | L225      | 4765.7      |
| I238      | L294       | M239      | 3310.7      |
| M239      | L141       | I197      | 3878.1      |
| M239      | L141       | L198      | 3233.8      |
| M239      | I197       | L141      | 3694.2      |
| M239      | I197       | L198      | 3349.9      |
| M239      | L198       | L141      | 6338.6      |
| M239      | L198       | I197      | 6893.1      |
| M239      | L198       | M201      | 6551.8      |
| M239      | M201       | L198      | 3599.8      |
| M239      | V212       | V293      | 5068.4      |
| M239      | M216       | I276      | 3123.2      |
| M239      | M216       | L292      | 4922.4      |
| M239      | L225       | L294      | 3184.5      |
| M239      | I238       | I276      | 9369.4      |
| M239      | M239       | L141      | 141.8       |
| M239      | M239       | I197      | 116.9       |
| M239      | M239       | L198      | 1058.5      |
| M239      | M239       | M201      | 187.7       |
| M239      | M239       | V212      | 619.3       |
| M239      | M239       | I215      | 106         |
| M239      | M239       | M216      | 141.8       |
| M239      | M239       | L225      | 448.2       |
| M239      | M239       | I238      | 2996.1      |
| M239      | M239       | V241      | 5599.2      |
| M239      | M239       | M262      | 5718.9      |
| M239      | M239       | L265      | 293.5       |
| M239      | M239       | L268      | 448.2       |
| M239      | M239       | I276      | 1317.9      |

| First Res | Second Res | Third Res | Scaled Flow |
|-----------|------------|-----------|-------------|
| M239      | M239       | L288      | 571.9       |
| M239      | M239       | L292      | 171.1       |
| M239      | M239       | V293      | 982.6       |
| M239      | M239       | L294      | 2806.7      |
| M239      | M239       | L357      | 172.1       |
| M239      | M262       | L268      | 13029.4     |
| M239      | L268       | M262      | 2208.8      |
| M239      | I276       | M216      | 6800.6      |
| M239      | I276       | I238      | 5534.2      |
| M239      | L292       | M216      | 5170.8      |
| M239      | V293       | V212      | 6114        |
| M239      | L294       | L225      | 7945.8      |
| V241      | V212       | V293      | 4859.4      |
| V241      | M216       | I238      | 2345.4      |
| V241      | M216       | I276      | 2821.3      |
| V241      | M216       | L292      | 4765.3      |
| V241      | I238       | M216      | 9523        |
| V241      | I238       | I276      | 8176.2      |
| V241      | M239       | M262      | 13602.3     |
| V241      | V241       | L198      | 187.7       |
| V241      | V241       | V212      | 571.9       |
| V241      | V241       | M216      | 95.9        |
| V241      | V241       | L225      | 1058.5      |
| V241      | V241       | I238      | 2996.1      |
| V241      | V241       | M239      | 5599.2      |
| V241      | V241       | M262      | 1465.7      |
| V241      | V241       | L265      | 141.8       |
| V241      | V241       | L268      | 116.9       |
| V241      | V241       | I276      | 2008.2      |
| V241      | V241       | L288      | 1416        |
| V241      | V241       | L292      | 106         |
| V241      | V241       | V293      | 1139.5      |
| V241      | V241       | L294      | 1139.5      |
| V241      | V241       | L357      | 764.3       |
| V241      | M262       | M239      | 4220.1      |
| V241      | M262       | L268      | 7570.4      |
| V241      | L268       | M262      | 3025.3      |
| V241      | I276       | M216      | 8575.2      |
| V241      | I276       | I238      | 6120.6      |
| V241      | I276       | L292      | 7914.3      |
| V241      | L292       | M216      | 4880.8      |

| First Res | Second Res | Third Res | Scaled Flow |
|-----------|------------|-----------|-------------|
| V241      | L292       | I276      | 2667        |
| V241      | V293       | V212      | 6459.6      |
| V250      | L141       | L198      | 2896.6      |
| V250      | I150       | L268      | 6965.1      |
| V250      | I197       | L198      | 3404.3      |
| V250      | L198       | L141      | 8042.3      |
| V250      | L198       | I197      | 6790.6      |
| V250      | M201       | L253      | 7593.9      |
| V250      | V250       | L141      | 116.9       |
| V250      | V250       | I150      | 619.3       |
| V250      | V250       | I197      | 379.4       |
| V250      | V250       | L198      | 1874.9      |
| V250      | V250       | M201      | 2459        |
| V250      | V250       | L253      | 379.4       |
| V250      | V250       | L265      | 1520.3      |
| V250      | V250       | L268      | 141.8       |
| V250      | V250       | V293      | 141.8       |
| V250      | V250       | L294      | 155.8       |
| V250      | V250       | L367      | 475.7       |
| V250      | L253       | M201      | 3183.3      |
| V250      | L268       | I150      | 4432.5      |
| L253      | M201       | V250      | 7524.6      |
| L253      | V250       | M201      | 3460.1      |
| L253      | V250       | L265      | 4756.3      |
| L253      | L253       | M201      | 2149.7      |
| L253      | L253       | V250      | 379.4       |
| L253      | L253       | L265      | 141.8       |
| L253      | L253       | L294      | 782.7       |
| L253      | L265       | V250      | 3587.3      |
| M262      | I150       | L268      | 4155.8      |
| M262      | I197       | L198      | 3893.3      |
| M262      | I197       | I209      | 4634.2      |
| M262      | L198       | I197      | 5594.9      |
| M262      | L198       | M201      | 6118.9      |
| M262      | M201       | L198      | 3773.8      |
| M262      | I209       | I197      | 3640.1      |
| M262      | I209       | I215      | 3918.7      |
| M262      | V212       | V293      | 6365.5      |
| M262      | I215       | I209      | 4920.8      |
| M262      | I238       | I276      | 7774.1      |
| M262      | M239       | V241      | 14056.8     |

| First Res | Second Res | Third Res | Scaled Flow |
|-----------|------------|-----------|-------------|
| M262      | M239       | L294      | 11403.9     |
| M262      | V241       | M239      | 4054.9      |
| M262      | M262       | L141      | 659.4       |
| M262      | M262       | I150      | 248.1       |
| M262      | M262       | I197      | 369         |
| M262      | M262       | L198      | 974.2       |
| M262      | M262       | M201      | 248.1       |
| M262      | M262       | I209      | 158         |
| M262      | M262       | V212      | 1012        |
| M262      | M262       | I215      | 353.4       |
| M262      | M262       | I238      | 1313.9      |
| M262      | M262       | M239      | 5718.9      |
| M262      | M262       | V241      | 1465.7      |
| M262      | M262       | L265      | 95.1        |
| M262      | M262       | L268      | 1881        |
| M262      | M262       | I276      | 659.4       |
| M262      | M262       | M291      | 95.1        |
| M262      | M262       | L292      | 128.4       |
| M262      | M262       | V293      | 516.8       |
| M262      | M262       | L294      | 937.7       |
| M262      | L268       | I150      | 9455.6      |
| M262      | I276       | I238      | 5753.9      |
| M262      | V293       | V212      | 4877        |
| M262      | L294       | M239      | 2655.7      |
| L265      | I150       | L268      | 6897.6      |
| L265      | I197       | L198      | 3961.4      |
| L265      | L198       | I197      | 5336.6      |
| L265      | L198       | M201      | 4428.4      |
| L265      | M201       | L198      | 4995.7      |
| L265      | M201       | L253      | 6144        |
| L265      | V212       | V293      | 4173.6      |
| L265      | M239       | V241      | 6061        |
| L265      | M239       | M262      | 6179.1      |
| L265      | M239       | L294      | 5068.5      |
| L265      | V241       | M239      | 4952.2      |
| L265      | V241       | M262      | 4038.4      |
| L265      | L253       | M201      | 3569.3      |
| L265      | M262       | M239      | 4739.6      |
| L265      | M262       | V241      | 3791.1      |
| L265      | M262       | L268      | 3835.6      |
| L265      | L265       | I150      | 724.5       |

| First Res | Second Res | Third Res | Scaled Flow |
|-----------|------------|-----------|-------------|
| L265      | L265       | I197      | 225.1       |
| L265      | L265       | L198      | 571.9       |
| L265      | L265       | M201      | 782.7       |
| L265      | L265       | V212      | 95.9        |
| L265      | L265       | M239      | 293.5       |
| L265      | L265       | V241      | 141.8       |
| L265      | L265       | V250      | 1520.3      |
| L265      | L265       | L253      | 141.8       |
| L265      | L265       | M262      | 95.1        |
| L265      | L265       | L268      | 225.1       |
| L265      | L265       | V293      | 412.6       |
| L265      | L265       | L294      | 187.7       |
| L265      | L265       | L357      | 228.7       |
| L265      | L268       | I150      | 4681.2      |
| L265      | L268       | M262      | 4627.8      |
| L265      | V293       | V212      | 6263.9      |
| L265      | L294       | M239      | 4460        |
| L268      | I197       | L198      | 4020.6      |
| L268      | L198       | I197      | 5339.9      |
| L268      | L198       | M201      | 5218.4      |
| L268      | L198       | V250      | 5809.1      |
| L268      | M201       | L198      | 4260.6      |
| L268      | M201       | V250      | 5436.1      |
| L268      | V212       | V293      | 7429.3      |
| L268      | I238       | M239      | 3914        |
| L268      | I238       | V241      | 4391.8      |
| L268      | I238       | M262      | 2575.2      |
| L268      | I238       | V293      | 3510.6      |
| L268      | M239       | I238      | 6039.2      |
| L268      | M239       | V241      | 6798.6      |
| L268      | M239       | M262      | 4715.7      |
| L268      | M239       | L294      | 5712.9      |
| L268      | V241       | I238      | 4607.9      |
| L268      | V241       | M239      | 4622.9      |
| L268      | V241       | M262      | 2696.3      |
| L268      | V250       | L198      | 3480.7      |
| L268      | V250       | M201      | 3989.5      |
| L268      | V250       | L265      | 3808.3      |
| L268      | M262       | I238      | 7788.8      |
| L268      | M262       | M239      | 9243.7      |
| L268      | M262       | V241      | 7772.5      |

| First Res | Second Res | Third Res | Scaled Flow |
|-----------|------------|-----------|-------------|
| L268      | L265       | V250      | 4313.6      |
| L268      | L268       | L141      | 268.9       |
| L268      | L268       | I150      | 4665.1      |
| L268      | L268       | I197      | 320         |
| L268      | L268       | L198      | 724.5       |
| L268      | L268       | M201      | 412.6       |
| L268      | L268       | V212      | 1139.5      |
| L268      | L268       | I238      | 95.9        |
| L268      | L268       | M239      | 448.2       |
| L268      | L268       | V241      | 116.9       |
| L268      | L268       | V250      | 141.8       |
| L268      | L268       | M262      | 1881        |
| L268      | L268       | L265      | 225.1       |
| L268      | L268       | V293      | 246.2       |
| L268      | L268       | L294      | 141.8       |
| L268      | V293       | V212      | 4256.1      |
| L268      | V293       | I238      | 4493.1      |
| L268      | L294       | M239      | 4078.1      |
| I276      | V212       | V293      | 6235.4      |
| I276      | M216       | L277      | 8654.2      |
| I276      | M216       | L292      | 6197.3      |
| I276      | L225       | L294      | 4563        |
| I276      | M239       | V241      | 5760.6      |
| I276      | M239       | M262      | 7289.5      |
| I276      | M239       | L294      | 7332.5      |
| I276      | V241       | M239      | 7300.7      |
| I276      | M262       | M239      | 5582.1      |
| I276      | I276       | L198      | 348.6       |
| I276      | I276       | V212      | 1058.5      |
| I276      | I276       | M216      | 1749.4      |
| I276      | I276       | L225      | 225.1       |
| I276      | I276       | I238      | 6693        |
| I276      | I276       | M239      | 1317.9      |
| I276      | I276       | V241      | 2008.2      |
| I276      | I276       | M262      | 659.4       |
| I276      | I276       | L277      | 782.7       |
| I276      | I276       | L288      | 320         |
| I276      | I276       | M291      | 128.8       |
| I276      | I276       | L292      | 1416        |
| I276      | I276       | V293      | 619.3       |
| I276      | I276       | L294      | 205.7       |

| First Res | Second Res | Third Res | Scaled Flow |
|-----------|------------|-----------|-------------|
| I276      | L277       | M216      | 5869.2      |
| I276      | L277       | L292      | 4701.3      |
| I276      | L292       | M216      | 5515.7      |
| I276      | L292       | L277      | 6169.6      |
| I276      | V293       | V212      | 4998.8      |
| I276      | L294       | L225      | 4448.9      |
| I276      | L294       | M239      | 3718.9      |
| L277      | I215       | L283      | 4088.4      |
| L277      | I238       | I276      | 5656.1      |
| L277      | I276       | I238      | 7145.1      |
| L277      | L277       | I215      | 246.2       |
| L277      | L277       | M216      | 7522.2      |
| L277      | L277       | I238      | 412.6       |
| L277      | L277       | I276      | 782.7       |
| L277      | L277       | L283      | 293.5       |
| L277      | L277       | L288      | 225.1       |
| L277      | L277       | L292      | 3408.7      |
| L277      | L283       | I215      | 4306.2      |
| L283      | M137       | M291      | 5382.3      |
| L283      | M216       | L277      | 6049.8      |
| L283      | L277       | M216      | 6049.8      |
| L283      | L283       | M120      | 130.6       |
| L283      | L283       | L125      | 284.9       |
| L283      | L283       | M137      | 844.9       |
| L283      | L283       | L141      | 106         |
| L283      | L283       | I209      | 384.8       |
| L283      | L283       | I215      | 1631.4      |
| L283      | L283       | M216      | 293.5       |
| L283      | L283       | M219      | 571.9       |
| L283      | L283       | L277      | 293.5       |
| L283      | L283       | M291      | 527.7       |
| L283      | M291       | M137      | 4491.4      |
| V285      | V285       | M219      | 535.2       |
| L288      | M216       | I276      | 4115.4      |
| L288      | M216       | L277      | 5975.2      |
| L288      | L225       | L294      | 6928.7      |
| L288      | I238       | M239      | 5427.6      |
| L288      | I238       | V241      | 4485.3      |
| L288      | I238       | I276      | 7380.7      |
| L288      | M239       | I238      | 4811.2      |
| L288      | M239       | V241      | 5232.9      |

| First Res | Second Res | Third Res | Scaled Flow |
|-----------|------------|-----------|-------------|
| L288      | M239       | L294      | 5585.6      |
| L288      | V241       | I238      | 5886.3      |
| L288      | V241       | M239      | 7747        |
| L288      | V241       | I276      | 6256.8      |
| L288      | I276       | M216      | 4450.5      |
| L288      | I276       | I238      | 5388        |
| L288      | I276       | V241      | 3480.5      |
| L288      | L277       | M216      | 5824.4      |
| L288      | L288       | M216      | 246.2       |
| L288      | L288       | L225      | 1520.3      |
| L288      | L288       | I238      | 782.7       |
| L288      | L288       | M239      | 571.9       |
| L288      | L288       | V241      | 1416        |
| L288      | L288       | I276      | 320         |
| L288      | L288       | L277      | 225.1       |
| L288      | L288       | V293      | 246.2       |
| L288      | L288       | L294      | 268.9       |
| L288      | L288       | V300      | 95.9        |
| L288      | L294       | L225      | 3521.8      |
| L288      | L294       | M239      | 4364.8      |
| M291      | L141       | L198      | 4919.1      |
| M291      | I197       | L198      | 4008        |
| M291      | I197       | I209      | 3191.7      |
| M291      | L198       | L141      | 3781.7      |
| M291      | L198       | I197      | 4641.8      |
| M291      | I209       | I197      | 5606.5      |
| M291      | I209       | I215      | 5797        |
| M291      | V212       | V293      | 7041.4      |
| M291      | I215       | I209      | 3548.9      |
| M291      | I215       | L283      | 3502.6      |
| M291      | L283       | I215      | 5192.3      |
| M291      | M291       | V134      | 571.9       |
| M291      | M291       | M137      | 2627.8      |
| M291      | M291       | L141      | 448.2       |
| M291      | M291       | I197      | 106         |
| M291      | M291       | L198      | 187.7       |
| M291      | M291       | I209      | 679.5       |
| M291      | M291       | V212      | 1139.5      |
| M291      | M291       | I215      | 141.8       |
| M291      | M291       | M219      | 155.8       |
| M291      | M291       | M262      | 95.1        |

| First Res | Second Res | Third Res | Scaled Flow |
|-----------|------------|-----------|-------------|
| M291      | M291       | I276      | 128.8       |
| M291      | M291       | L283      | 527.7       |
| M291      | M291       | V293      | 348.6       |
| M291      | V293       | V212      | 4480.2      |
| L292      | L198       | V212      | 3739.7      |
| L292      | L198       | V293      | 3607.5      |
| L292      | V212       | L198      | 3739.7      |
| L292      | V212       | V293      | 4599        |
| L292      | M216       | L277      | 8549.6      |
| L292      | I238       | M239      | 6136        |
| L292      | I238       | V241      | 6484        |
| L292      | I238       | I276      | 5607.3      |
| L292      | M239       | I238      | 4101.9      |
| L292      | M239       | V241      | 5553.3      |
| L292      | M239       | M262      | 5401.7      |
| L292      | V241       | I238      | 3837.1      |
| L292      | V241       | M239      | 4915.9      |
| L292      | V241       | M262      | 3752.3      |
| L292      | V241       | I276      | 3123.8      |
| L292      | M262       | M239      | 5195.5      |
| L292      | M262       | V241      | 4077        |
| L292      | I276       | I238      | 8061        |
| L292      | I276       | V241      | 7588.4      |
| L292      | L277       | M216      | 6539.6      |
| L292      | L292       | L198      | 106         |
| L292      | L292       | V212      | 106         |
| L292      | L292       | I215      | 571.9       |
| L292      | L292       | M216      | 4385.6      |
| L292      | L292       | I238      | 619.3       |
| L292      | L292       | M239      | 171.1       |
| L292      | L292       | V241      | 106         |
| L292      | L292       | M262      | 128.4       |
| L292      | L292       | I276      | 1416        |
| L292      | L292       | L277      | 3408.7      |
| L292      | L292       | V293      | 155.8       |
| L292      | V293       | L198      | 3975.7      |
| L292      | V293       | V212      | 5068.4      |
| V293      | M137       | M291      | 3951.7      |
| V293      | I150       | L268      | 5168.2      |
| V293      | L198       | V250      | 6770        |
| V293      | M216       | I276      | 3617.3      |



| First Res | Second Res | Third Res | Scaled Flow |
|-----------|------------|-----------|-------------|
| V293      | M216       | L292      | 5220.5      |
| V293      | I238       | M239      | 5553.4      |
| V293      | I238       | V241      | 5331.4      |
| V293      | I238       | I276      | 8061        |
| V293      | M239       | I238      | 4659.9      |
| V293      | M239       | V241      | 6115.7      |
| V293      | M239       | M262      | 6945.4      |
| V293      | V241       | I238      | 4787.1      |
| V293      | V241       | M239      | 6544.1      |
| V293      | V250       | L198      | 3222.8      |
| V293      | V250       | L265      | 3550.4      |
| V293      | M262       | M239      | 5586.9      |
| V293      | M262       | L268      | 5063.9      |
| V293      | L265       | V250      | 4837.9      |
| V293      | L268       | I150      | 5438        |
| V293      | L268       | M262      | 3859.1      |
| V293      | I276       | M216      | 5277.9      |
| V293      | I276       | I238      | 5607.3      |
| V293      | M291       | M137      | 5484.4      |
| V293      | L292       | M216      | 4967.8      |
| V293      | V293       | M137      | 106         |
| V293      | V293       | I150      | 205.7       |
| V293      | V293       | I197      | 670.1       |
| V293      | V293       | L198      | 1225.9      |
| V293      | V293       | I209      | 261         |
| V293      | V293       | V212      | 3870.3      |
| V293      | V293       | M216      | 187.7       |
| V293      | V293       | I238      | 1416        |
| V293      | V293       | M239      | 982.6       |
| V293      | V293       | V241      | 1139.5      |
| V293      | V293       | V250      | 141.8       |
| V293      | V293       | M262      | 516.8       |
| V293      | V293       | L265      | 412.6       |
| V293      | V293       | L268      | 246.2       |
| V293      | V293       | I276      | 619.3       |
| V293      | V293       | L288      | 246.2       |
| V293      | V293       | M291      | 348.6       |
| V293      | V293       | L292      | 155.8       |
| L294      | L141       | L198      | 3535.2      |
| L294      | L198       | L141      | 5448.5      |
| L294      | L198       | V250      | 5622.5      |

| First Res | Second Res | Third Res | Scaled Flow |
|-----------|------------|-----------|-------------|
| L294      | M201       | V250      | 6416.3      |
| L294      | I238       | M239      | 3440.8      |
| L294      | I238       | V241      | 4107.1      |
| L294      | I238       | I276      | 6208.1      |
| L294      | M239       | I238      | 9570.9      |
| L294      | M239       | V241      | 8770.6      |
| L294      | M239       | M262      | 9173.8      |
| L294      | V241       | I238      | 6629.5      |
| L294      | V241       | M239      | 5089.6      |
| L294      | V241       | I276      | 6351.1      |
| L294      | V250       | L198      | 3559.1      |
| L294      | V250       | M201      | 3701.6      |
| L294      | V250       | L265      | 3939.3      |
| L294      | M262       | M239      | 5050.6      |
| L294      | M262       | L268      | 6350.3      |
| L294      | L265       | V250      | 4139.7      |
| L294      | L268       | M262      | 3300        |
| L294      | I276       | I238      | 5455.9      |
| L294      | I276       | V241      | 3457.9      |
| L294      | L294       | L141      | 171.1       |
| L294      | L294       | L198      | 670.1       |
| L294      | L294       | M201      | 844.9       |
| L294      | L294       | L225      | 2299.8      |
| L294      | L294       | I238      | 320         |
| L294      | L294       | M239      | 2806.7      |
| L294      | L294       | V241      | 1139.5      |
| L294      | L294       | V250      | 155.8       |
| L294      | L294       | L253      | 782.7       |
| L294      | L294       | M262      | 937.7       |
| L294      | L294       | L265      | 187.7       |
| L294      | L294       | L268      | 141.8       |
| L294      | L294       | I276      | 205.7       |
| L294      | L294       | L288      | 268.9       |
| V300      | V300       | I130      | 1520.3      |
| V300      | V300       | V186      | 97.3        |
| V300      | V300       | I220      | 284.9       |
| V300      | V300       | L288      | 95.9        |
| V300      | V300       | V333      | 128.8       |
| V323      | V323       | M182      | 96.5        |
| V333      | L77        | I149      | 5363.5      |
| V333      | I149       | L77       | 4324.3      |

| First Res | Second Res | Third Res | Scaled Flow |
|-----------|------------|-----------|-------------|
| V333      | V333       | I55       | 130.6       |
| V333      | V333       | L77       | 412.6       |
| V333      | V333       | I149      | 199.3       |
| V333      | V333       | V300      | 128.8       |
| L337      | L337       | V33       | 97.3        |
| V343      | V16        | L78       | 3667.9      |
| V343      | L78        | V16       | 4827.5      |
| V343      | V343       | V16       | 106         |
| V343      | V343       | L78       | 293.5       |
| V343      | V343       | M81       | 2996.1      |
| V343      | V343       | M109      | 208.6       |
| L357      | M239       | V241      | 4658.5      |
| L357      | V241       | M239      | 7548.6      |
| L357      | L357       | L225      | 250.8       |
| L357      | L357       | M239      | 172.1       |
| L357      | L357       | V241      | 764.3       |
| L357      | L357       | L265      | 228.7       |
| V361      | V26        | L30       | 4132.6      |
| V361      | L30        | V26       | 4415.4      |
| V361      | V361       | V26       | 240.6       |
| V361      | V361       | L30       | 301         |
| V361      | V361       | I87       | 106.8       |
| V361      | V361       | I130      | 173.9       |
| V361      | V361       | I220      | 238.5       |
| V361      | V361       | L367      | 126.2       |
| L367      | L367       | V16       | 353.4       |
| L367      | L367       | V250      | 475.7       |
| L367      | L367       | V361      | 126.2       |

**Table S15.** Community membership for +BIRB796 p38y

---

|          |                                                                                                                                                                |
|----------|----------------------------------------------------------------------------------------------------------------------------------------------------------------|
| module1  | 141, 150, 197, 198, 201, 209, 212, 215, 216, 238, 239, 241, 250, 262, 265, 268, 276, 291, 292, 293, 294, 357                                                   |
| module2  | 120, 125, 137, 141, 150, 161, 167, 197, 198, 201, 209, 212, 215, 216, 219, 238, 239, 241, 250, 253, 262, 265, 268, 276, 277, 283, 291, 292, 293, 294, 357, 367 |
| module3  | 198, 215, 216, 238, 239, 241, 262, 276, 277, 283, 288, 292, 293                                                                                                |
| module4  | 197, 198, 212, 216, 225, 238, 239, 241, 262, 276, 277, 288, 291, 292, 293, 294                                                                                 |
| module5  | 16, 23, 41, 53, 78, 87, 109, 112, 116, 144, 154, 159, 161, 167, 169, 170, 343                                                                                  |
| module6  | 16, 23, 26, 30, 33, 45, 55, 58, 66, 75, 78, 86, 87, 89, 90, 174, 361                                                                                           |
| module7  | 141, 198, 201, 225, 238, 239, 241, 250, 253, 262, 265, 268, 276, 288, 294, 357                                                                                 |
| module8  | 137, 150, 197, 198, 209, 212, 216, 238, 239, 241, 250, 262, 265, 268, 276, 288, 291, 292, 293                                                                  |
| module9  | 134, 137, 141, 197, 198, 209, 212, 215, 219, 262, 276, 283, 291, 293                                                                                           |
| module10 | 23, 26, 41, 55, 58, 66, 75, 77, 86, 89, 149, 174, 186, 333                                                                                                     |
| module11 | 16, 23, 26, 30, 41, 53, 55, 66, 75, 78, 87, 89, 90, 112, 161, 174, 333, 361                                                                                    |
| module12 | 16, 30, 33, 41, 45, 55, 58, 78, 81, 87, 89, 109, 337, 343, 367                                                                                                 |
| module13 | 16, 58, 78, 81, 109, 343                                                                                                                                       |
| module14 | 216, 225, 238, 239, 241, 276, 277, 288, 293, 294, 300                                                                                                          |
| module15 | 130, 186, 220, 288, 300, 333, 361, 367                                                                                                                         |
| module16 | 75, 174, 182, 186, 187, 300, 323                                                                                                                               |
| module17 | 120, 137, 219, 283, 285, 291                                                                                                                                   |
| module18 | 198, 239                                                                                                                                                       |
| module19 | 198, 238                                                                                                                                                       |
| module20 | 198, 276                                                                                                                                                       |
| module21 | 58, 66                                                                                                                                                         |
| module22 | 119                                                                                                                                                            |
| module23 | 239, 276                                                                                                                                                       |
| module24 | 239, 268                                                                                                                                                       |
| module25 | 241, 268                                                                                                                                                       |
| module26 | 287                                                                                                                                                            |

## References

- 1 Tugarinov, V., Kanelis, V. & Kay, L. E. Isotope labeling strategies for the study of high-molecular-weight proteins by solution NMR spectroscopy. *Nat. Protoc.* **1**, 749-754, doi:10.1038/nprot.2006.101 (2006).
- 2 Tugarinov, V. & Kay, L. Ile, Leu, and Val methyl assignments of the 723-residue malate synthase G using a new labeling strategy and novel NMR methods. *J. Am. Chem. Soc.* **125**, 13868-13878, doi:10.1021/ja030345s (2003).
- 3 Hyberts, S. G., Takeuchi, K. & Wagner, G. Poisson-gap sampling and forward maximum entropy reconstruction for enhancing the resolution and sensitivity of protein NMR data. *J. Am. Chem. Soc.* **132**, 2145-2147, doi:10.1021/ja908004w (2010).
- 4 Aoto, P. C., Fenwick, R. B., Kroon, G. J. A. & Wright, P. E. Accurate scoring of non-uniform sampling schemes for quantitative NMR. *Journal of magnetic resonance (San Diego, Calif: 1997)* **246**, 31-35, doi:10.1016/j.jmr.2014.06.020 (2014).
- 5 Otten, R., Chu, B., Krewulak, K. D., Vogel, H. J. & Mulder, F. A. A. Comprehensive and cost-effective NMR spectroscopy of methyl groups in large proteins. *J. Am. Chem. Soc.* **132**, 2952-2960, doi:10.1021/ja907706a (2010).
- 6 Neri, D., Szyperski, T., Otting, G., Senn, H. & Wüthrich, K. Stereospecific nuclear magnetic resonance assignments of the methyl groups of valine and leucine in the DNA-binding domain of the 434 repressor by biosynthetically directed fractional <sup>13</sup>C labeling. *Biochemistry* **28**, 7510-7516 (1989).
- 7 Shi, Z., Resing, K. A. & Ahn, N. G. Networks for the allosteric control of protein kinases. *Curr. Opin. Struct. Biol.* **16**, 686-692, doi:10.1016/j.sbi.2006.10.011 (2006).
- 8 Huse, M. & Kuriyan, J. The conformational plasticity of protein kinases. *Cell* **109**, 275-282 (2002).
- 9 Diskin, R., Engelberg, D. & Livnah, O. A novel lipid binding site formed by the MAP kinase insert in p38 alpha. *J. Mol. Biol.* **375**, 70-79, doi:10.1016/j.jmb.2007.09.002 (2008).
- 10 Kannan, N. & Neuwald, A. F. Evolutionary constraints associated with functional specificity of the CMGC protein kinases MAPK, CDK, GSK, SRPK, DYRK, and CK2alpha. *Protein science : a publication of the Protein Society* **13**, 2059-2077, doi:10.1110/ps.04637904 (2004).
- 11 Tokunaga, Y., Takeuchi, K., Takahashi, H. & Shimada, I. Allosteric enhancement of MAP kinase p38 $\alpha$ 's activity and substrate selectivity by docking interactions. *Nat. Struct. Mol. Biol.*, doi:10.1038/nsmb.2861 (2014).
- 12 Masterson, L. R. *et al.* Dynamics connect substrate recognition to catalysis in protein kinase A. *Nat. Chem. Biol.*, 1-8, doi:10.1038/nchembio.452 (2010).

- 13 Srivastava, Atul K. *et al.* Synchronous Opening and Closing Motions Are Essential for cAMP-Dependent Protein Kinase A Signaling. *Structure/Folding and Design* **22**, 1735-1743, doi:10.1016/j.str.2014.09.010 (2014).
- 14 Taylor, S. S. & Kornev, A. P. Protein kinases: evolution of dynamic regulatory proteins. *Trends Biochem. Sci.* **36**, 65-77, doi:10.1016/j.tibs.2010.09.006 (2011).
- 15 Zhang, J. *et al.* Targeting Bcr-Abl by combining allosteric with ATP-binding-site inhibitors. *Nature* **463**, 501-506, doi:10.1038/nature08675 (2010).
- 16 Skora, L., Mestan, J., Fabbro, D., Jahnke, W. & Grzesiek, S. NMR reveals the allosteric opening and closing of Abelson tyrosine kinase by ATP-site and myristoyl pocket inhibitors. *Proc. Natl. Acad. Sci. U. S. A.*, doi:10.1073/pnas.1314712110 (2013).
- 17 Zhang, Y.-Y., Wu, J.-W. & Wang, Z.-X. Mitogen-activated protein kinase (MAPK) phosphatase 3-mediated cross-talk between MAPKs ERK2 and p38alpha. *J. Biol. Chem.* **286**, 16150-16162, doi:10.1074/jbc.M110.203786 (2011).
- 18 Diskin, R., Lebendiker, M., Engelberg, D. & Livnah, O. Structures of p38alpha active mutants reveal conformational changes in L16 loop that induce autophosphorylation and activation. *J. Mol. Biol.* **365**, 66-76, doi:10.1016/j.jmb.2006.08.043 (2007).
- 19 Salvador, J. M. *et al.* Alternative p38 activation pathway mediated by T cell receptor-proximal tyrosine kinases. *Nat. Immunol.* **6**, 390-395, doi:10.1038/ni1177 (2005).
- 20 Tzarum, N., Diskin, R., Engelberg, D. & Livnah, O. Active Mutants of the TCR-Mediated p38 $\alpha$  Alternative Activation Site Show Changes in the Phosphorylation Lip and DEF Site Formation. *J. Mol. Biol.* **405**, 1154-1169, doi:10.1016/j.jmb.2010.11.023 (2011).
- 21 De Nicola, G. F. *et al.* Mechanism and consequence of the autoactivation of p38 $\alpha$  mitogen-activated protein kinase promoted by TAB1. *Nat. Struct. Mol. Biol.*, doi:10.1038/nsmb.2668 (2013).
- 22 Ahn, Y.-Y., Bagrow, J. P. & Lehmann, S. Link communities reveal multiscale complexity in networks. *Nature* **466**, 761-764, doi:10.1038/nature09182 (2010).
- 23 Kalinka, A. T. & Tomancak, P. linkcomm: an R package for the generation, visualization, and analysis of link communities in networks of arbitrary size and type. *Bioinformatics* **27**, 2011-2012, doi:10.1093/bioinformatics/btr311 (2011).
- 24 cluster: Cluster Analysis Basics and Extensions v. R package version 2.0.3 (2015).
